# Supplementary material for: Mapping the end-of-life of chemicals for circular economy opportunities
Source: Royal Society of Chemistry journal article supplement (doi:10.1039/d4su00517a), 2024-01-01
Supplement: d4su00517a1.pdf [file d4su00517a1.pdf]

Supplementary Information

## **Mapping the end-of-life of chemicals for circular economy opportunities**

Taylor Uekert<sup>a,\*</sup>

<sup>a</sup> Strategic Energy Analysis Center, National Renewable Energy Laboratory, Golden, Colorado, 80401, United States

\* [taylor.uekert@nrel.gov](mailto:taylor.uekert@nrel.gov)

**This PDF contains:** Figures S1-S6, Tables S1-S9, Supplementary References

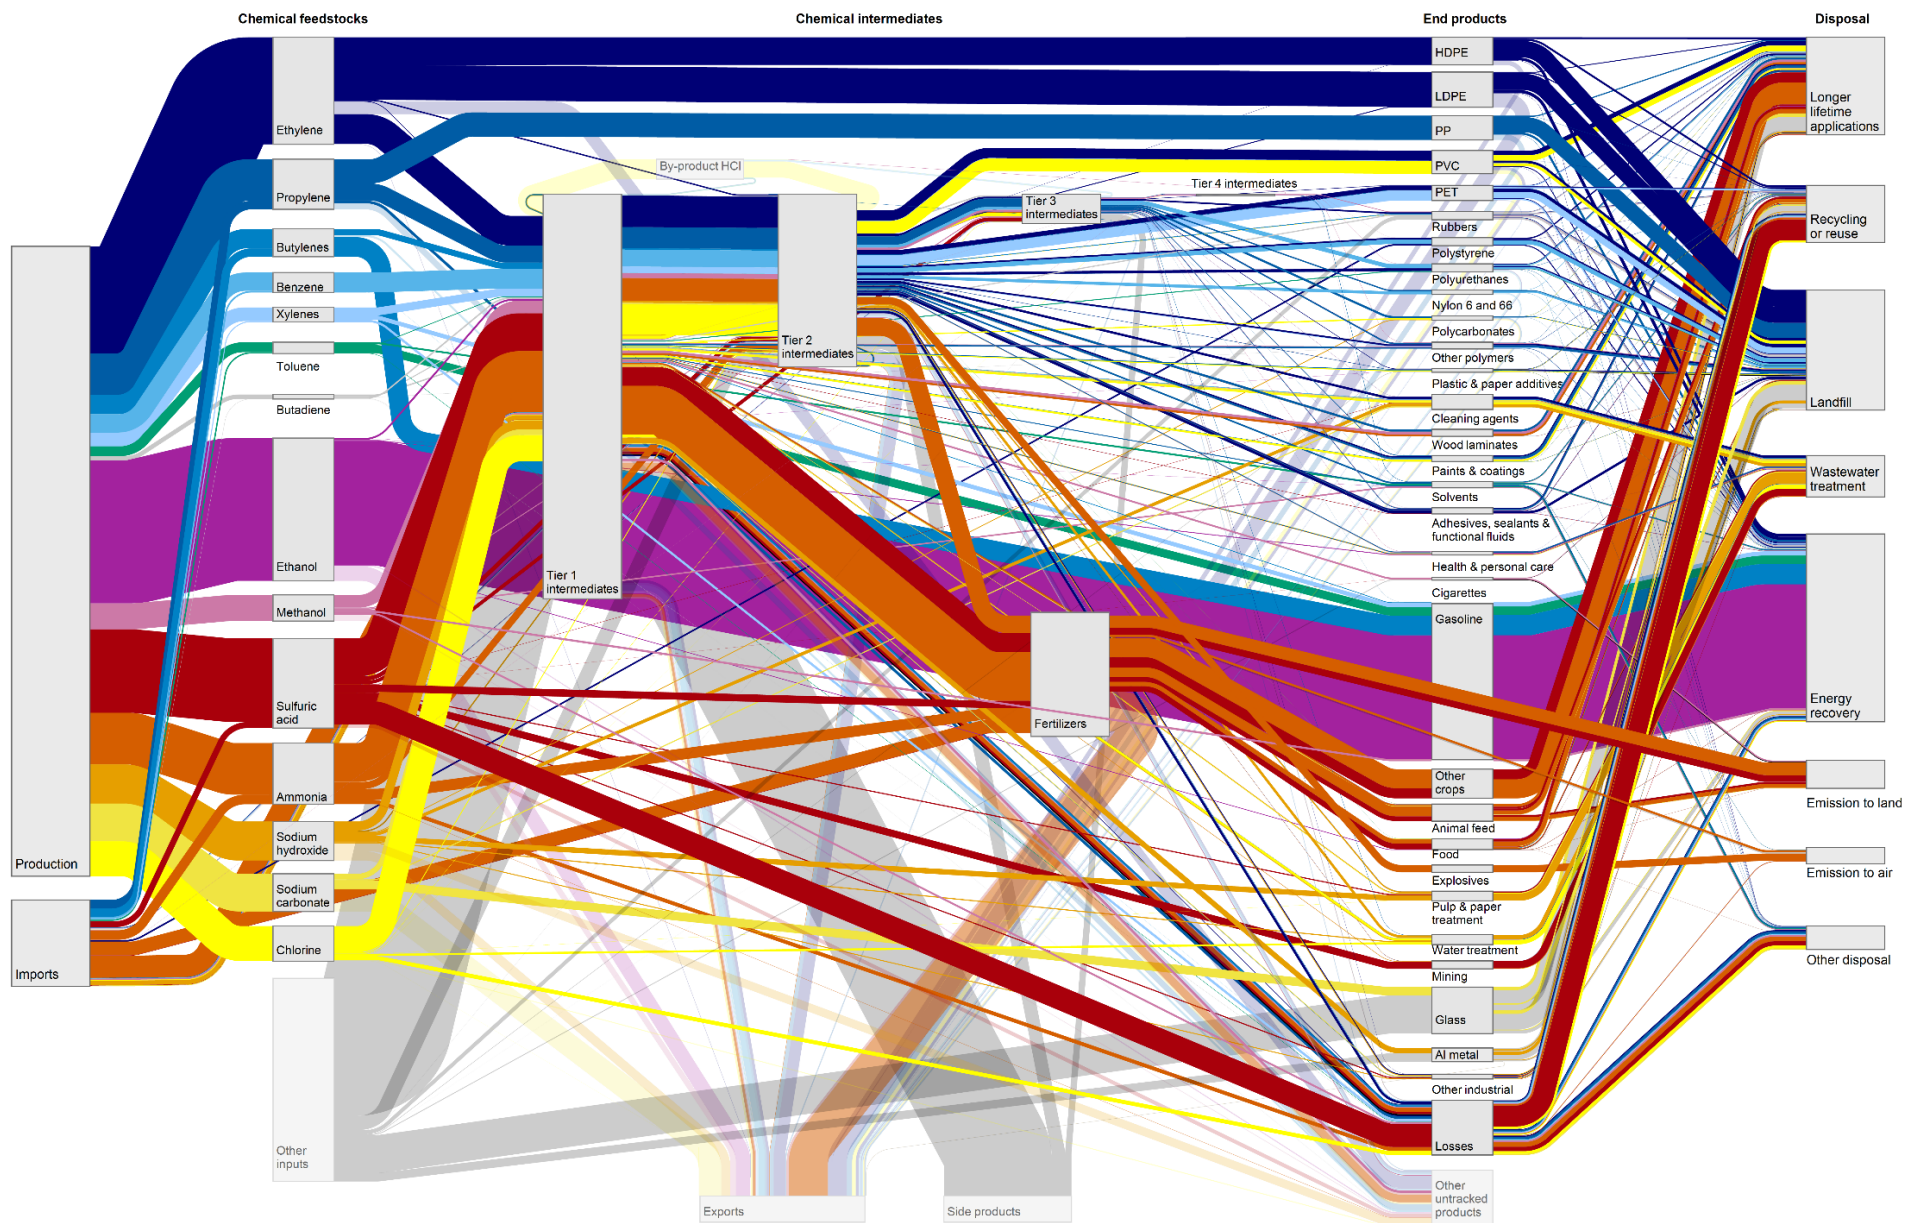

**Figure S1.** Sankey diagram representing the flow of chemicals in the U.S. in million metric tons from production through to intermediates, final products, and disposal. “Other inputs” include feedstocks beyond those listed in the study, such as oxygen, water, hydrogen, or carbon monoxide. “Side products” include by-products that are generated due to chemical reaction stoichiometry, such as carbon dioxide or water. For visual clarity, emissions to water (0.1 Mt) are combined with wastewater treatment (12.4 Mt). Abbreviations: HCl – hydrochloric acid; HDPE – high density polyethylene; LDPE – low density polyethylene; PP – polypropylene; PVC – polyvinyl chloride; PET – polyethylene terephthalate; Al – aluminum.

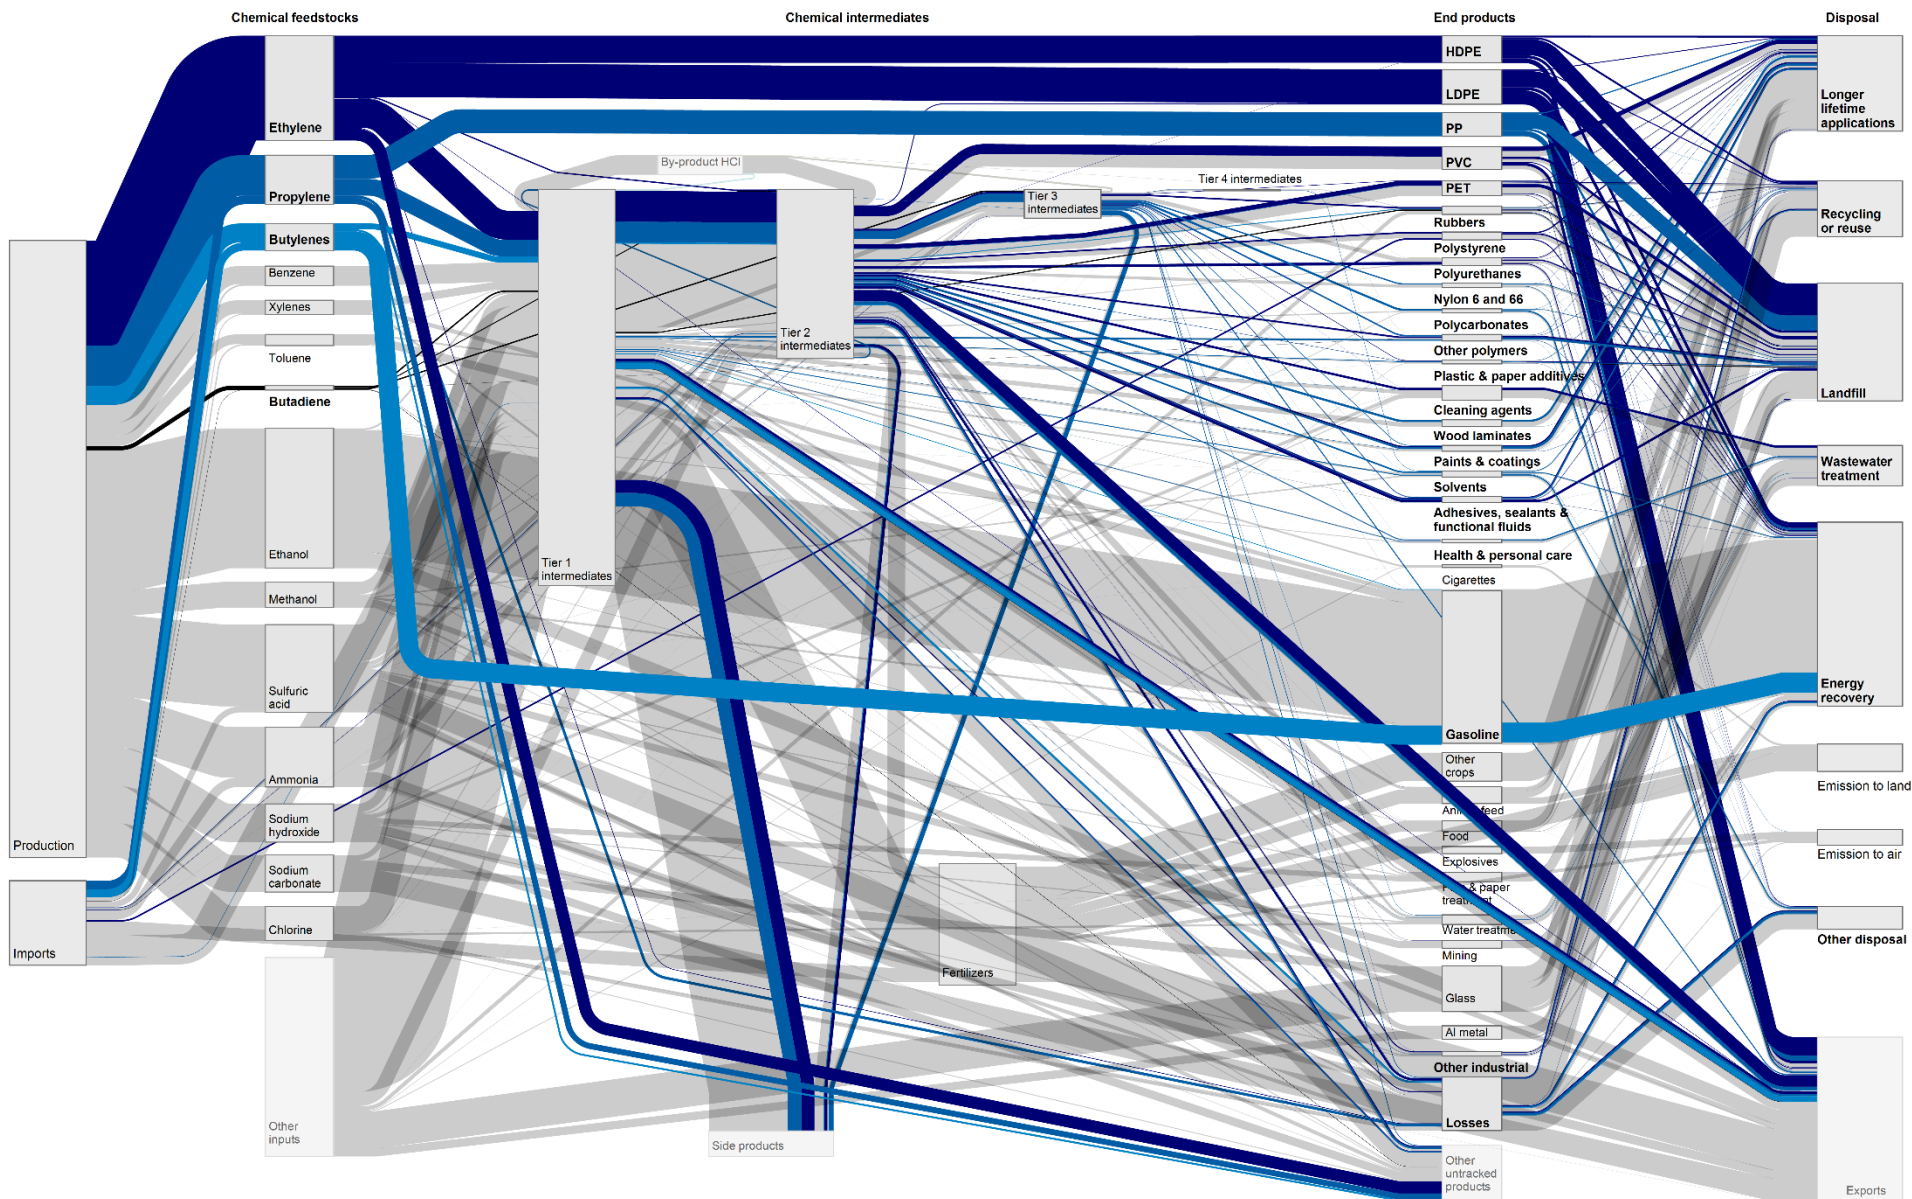

**Figure S2.** Sankey diagram highlighting the flow of olefins (ethylene, propylene, butylenes, and butadiene) in the U.S. in million metric tons from production through to intermediates, final products, and disposal. Bolded text indicates the relevant end-products and disposal types for olefins. “Other inputs” include feedstocks beyond those listed in the study, such as oxygen, water, hydrogen, or carbon monoxide. “Side products” include by-products that are generated due to chemical reaction stoichiometry, such as carbon dioxide or water. Abbreviations: HCl – hydrochloric acid; HDPE – high density polyethylene; LDPE – low density polyethylene; PP – polypropylene; PVC – polyvinyl chloride; PET – polyethylene terephthalate; Al – aluminum.

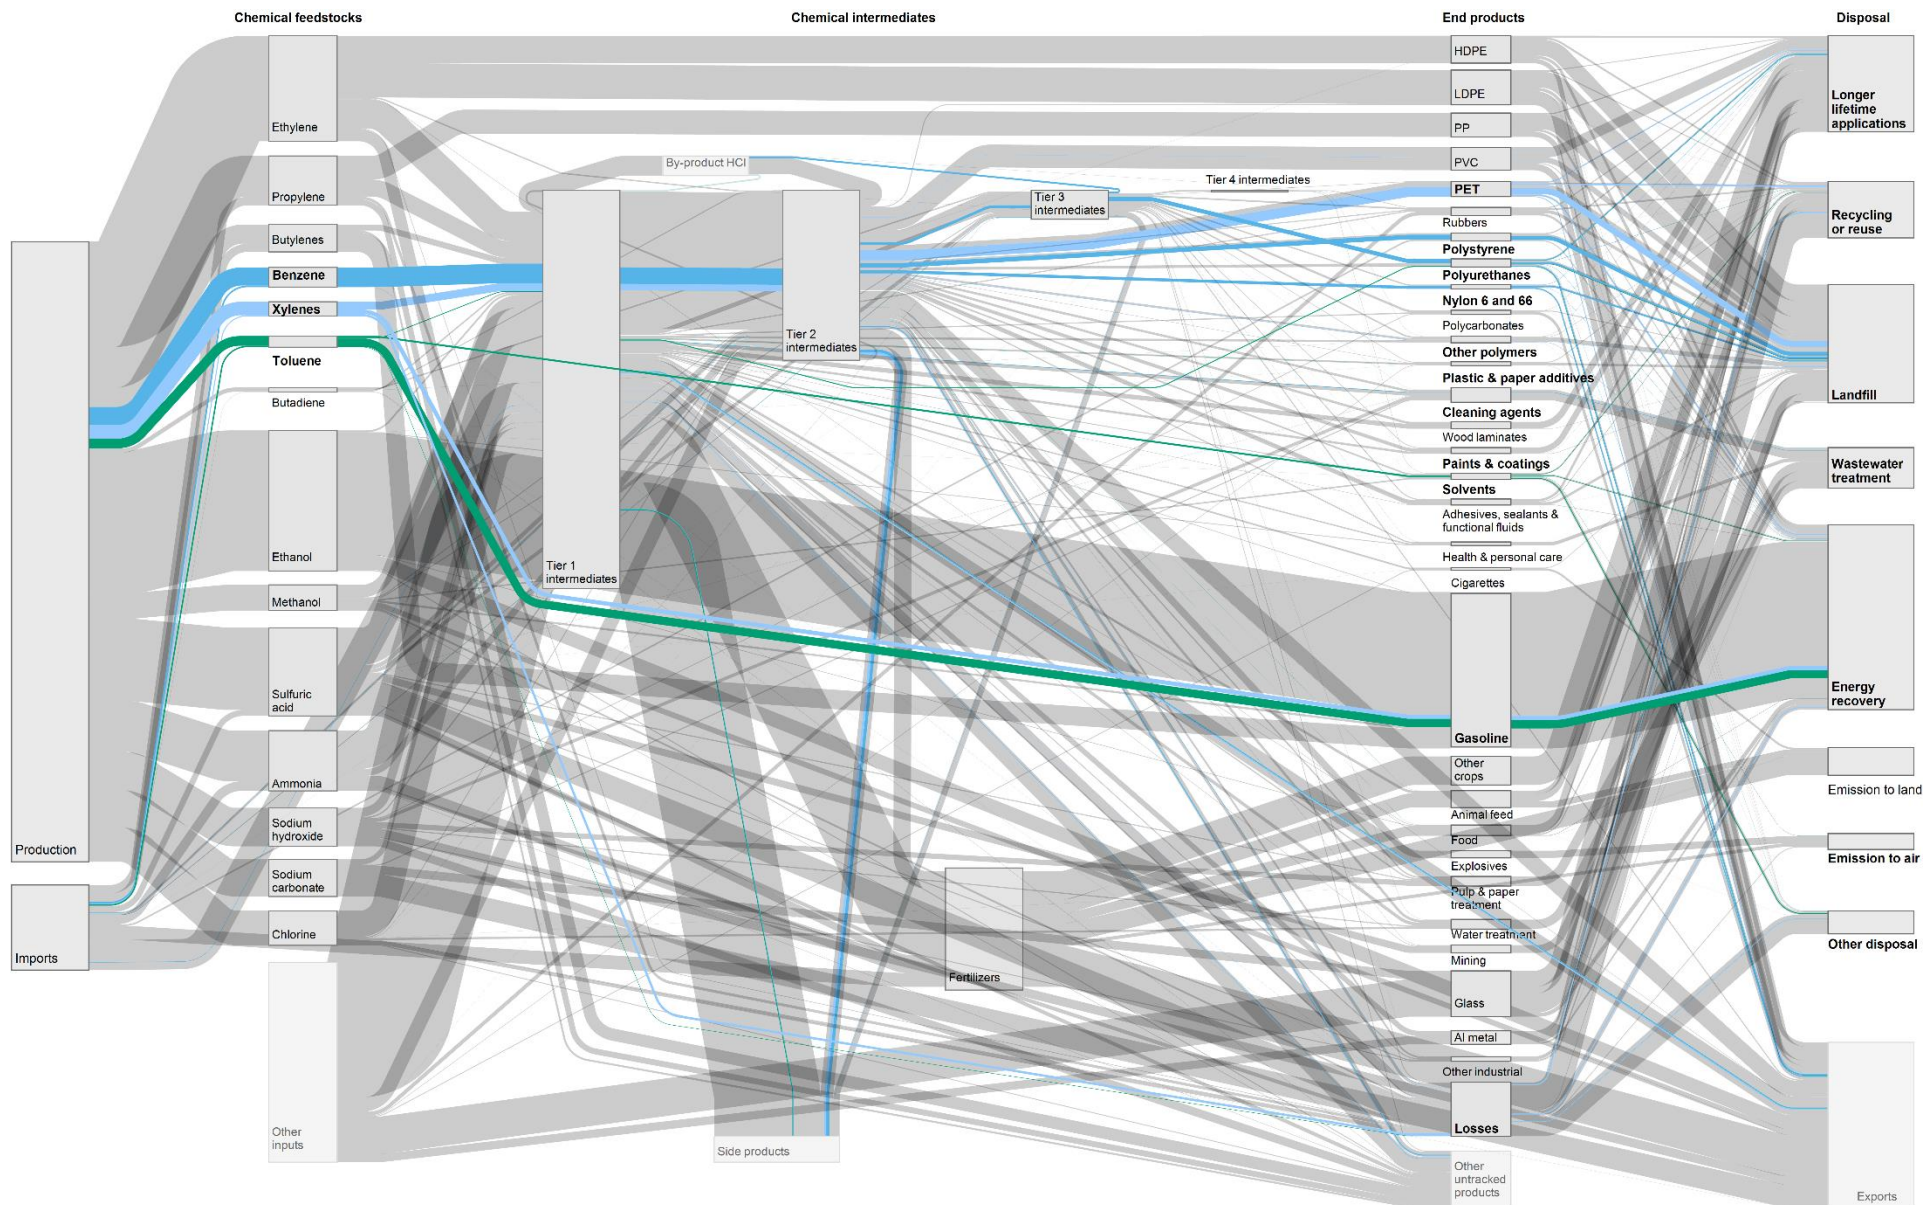

**Figure S3.** Sankey diagram highlighting the flow of aromatics (benzene, toluene, and xylenes) in the U.S. in million metric tons from production through to intermediates, final products, and disposal. Bolded text indicates the relevant end-products and disposal types for aromatics. “Other inputs” include feedstocks beyond those listed in the study, such as oxygen, water, hydrogen, or carbon monoxide. “Side products” include by-products that are generated due to chemical reaction stoichiometry, such as carbon dioxide or water. Abbreviations: HCl – hydrochloric acid; HDPE – high density polyethylene; LDPE – low density polyethylene; PP – polypropylene; PVC – polyvinyl chloride; PET – polyethylene terephthalate; Al – aluminum.

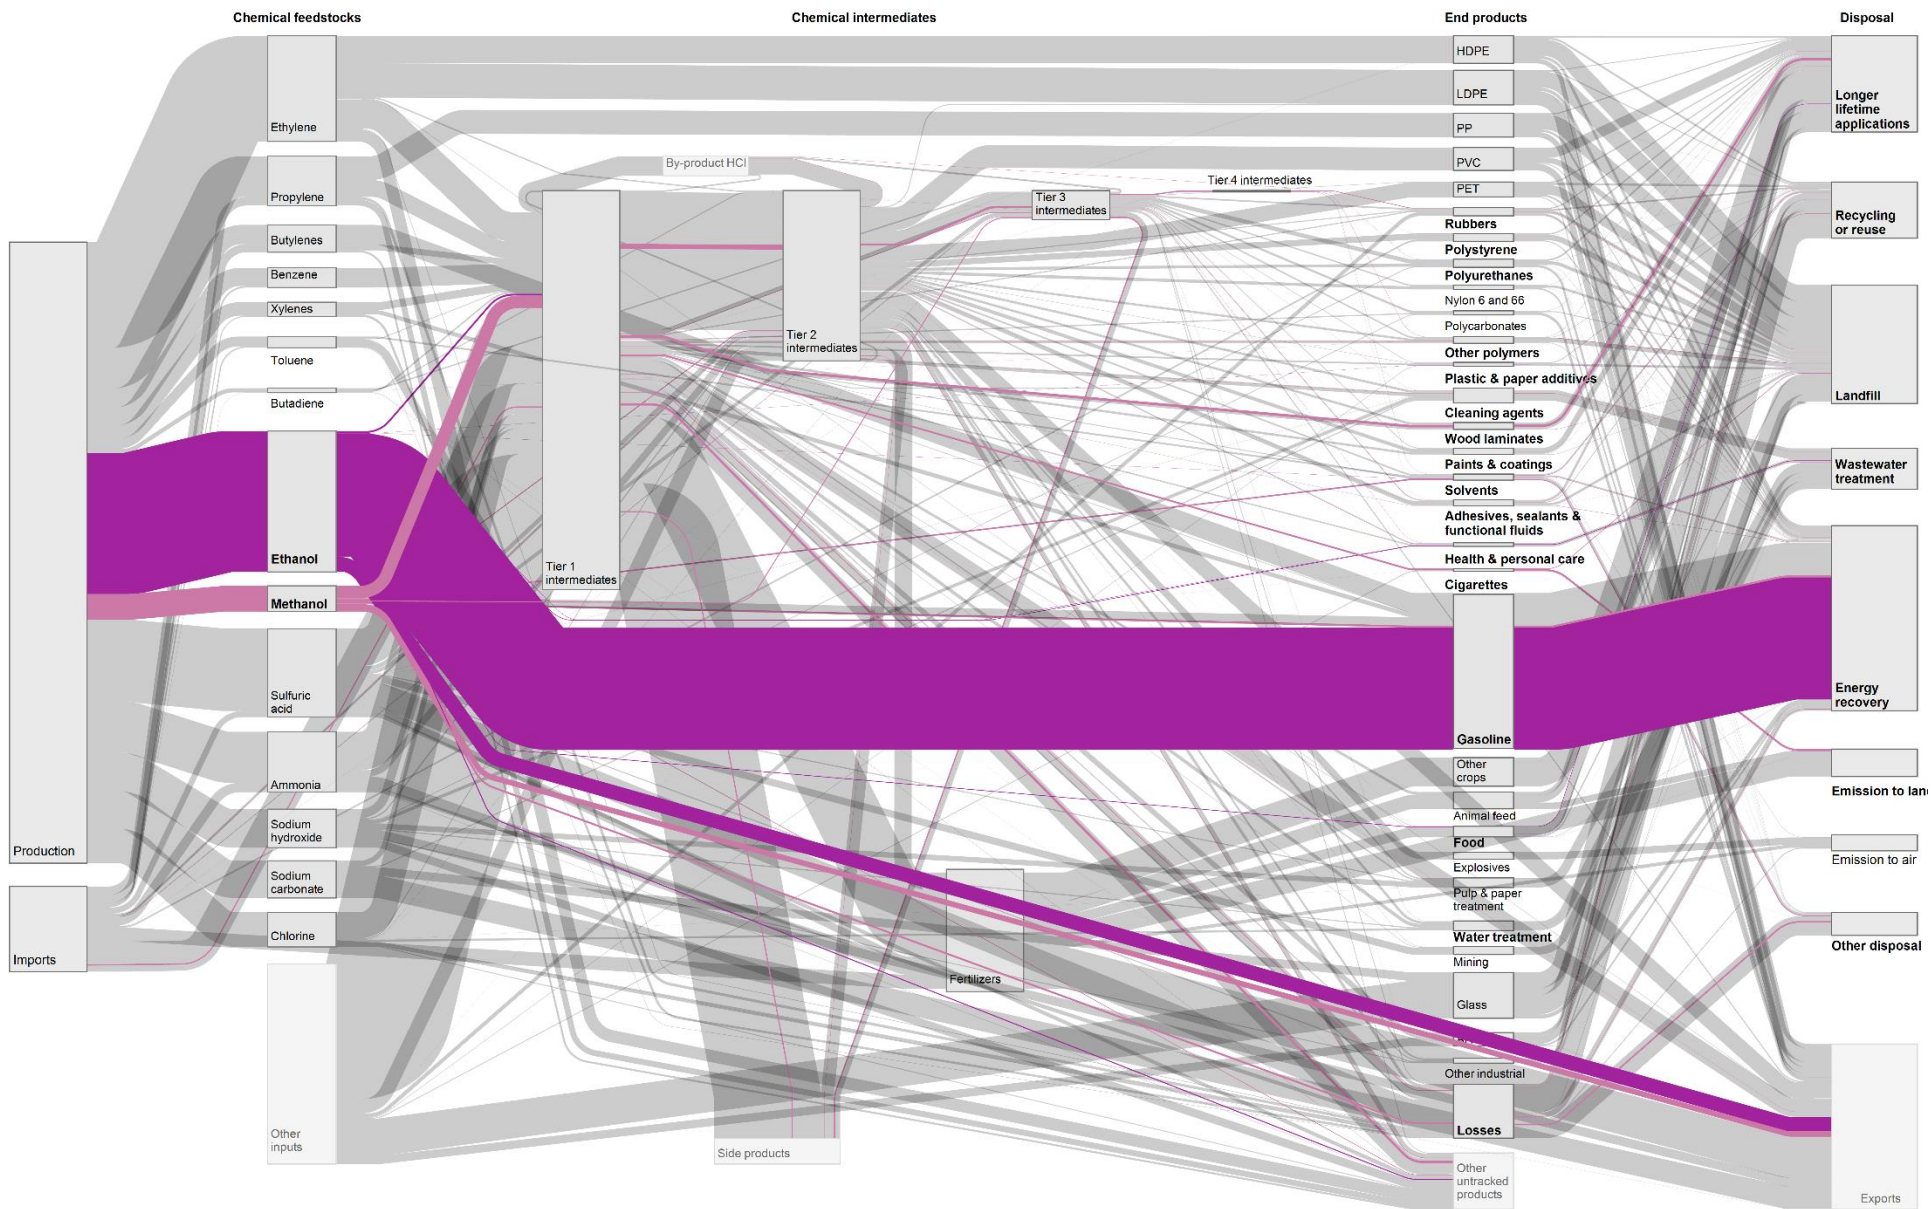

**Figure S4.** Sankey diagram highlighting the flow of alcohols (ethanol and methanol) in the U.S. in million metric tons from production through to intermediates, final products, and disposal. Bolded text indicates the relevant end-products and disposal types for alcohols. “Other inputs” include feedstocks beyond those listed in the study, such as oxygen, water, hydrogen, or carbon monoxide. “Side products” include by-products that are generated due to chemical reaction stoichiometry, such as carbon dioxide or water. Abbreviations: HCl – hydrochloric acid; HDPE – high density polyethylene; LDPE – low density polyethylene; PP – polypropylene; PVC – polyvinyl chloride; PET – polyethylene terephthalate; Al – aluminum.

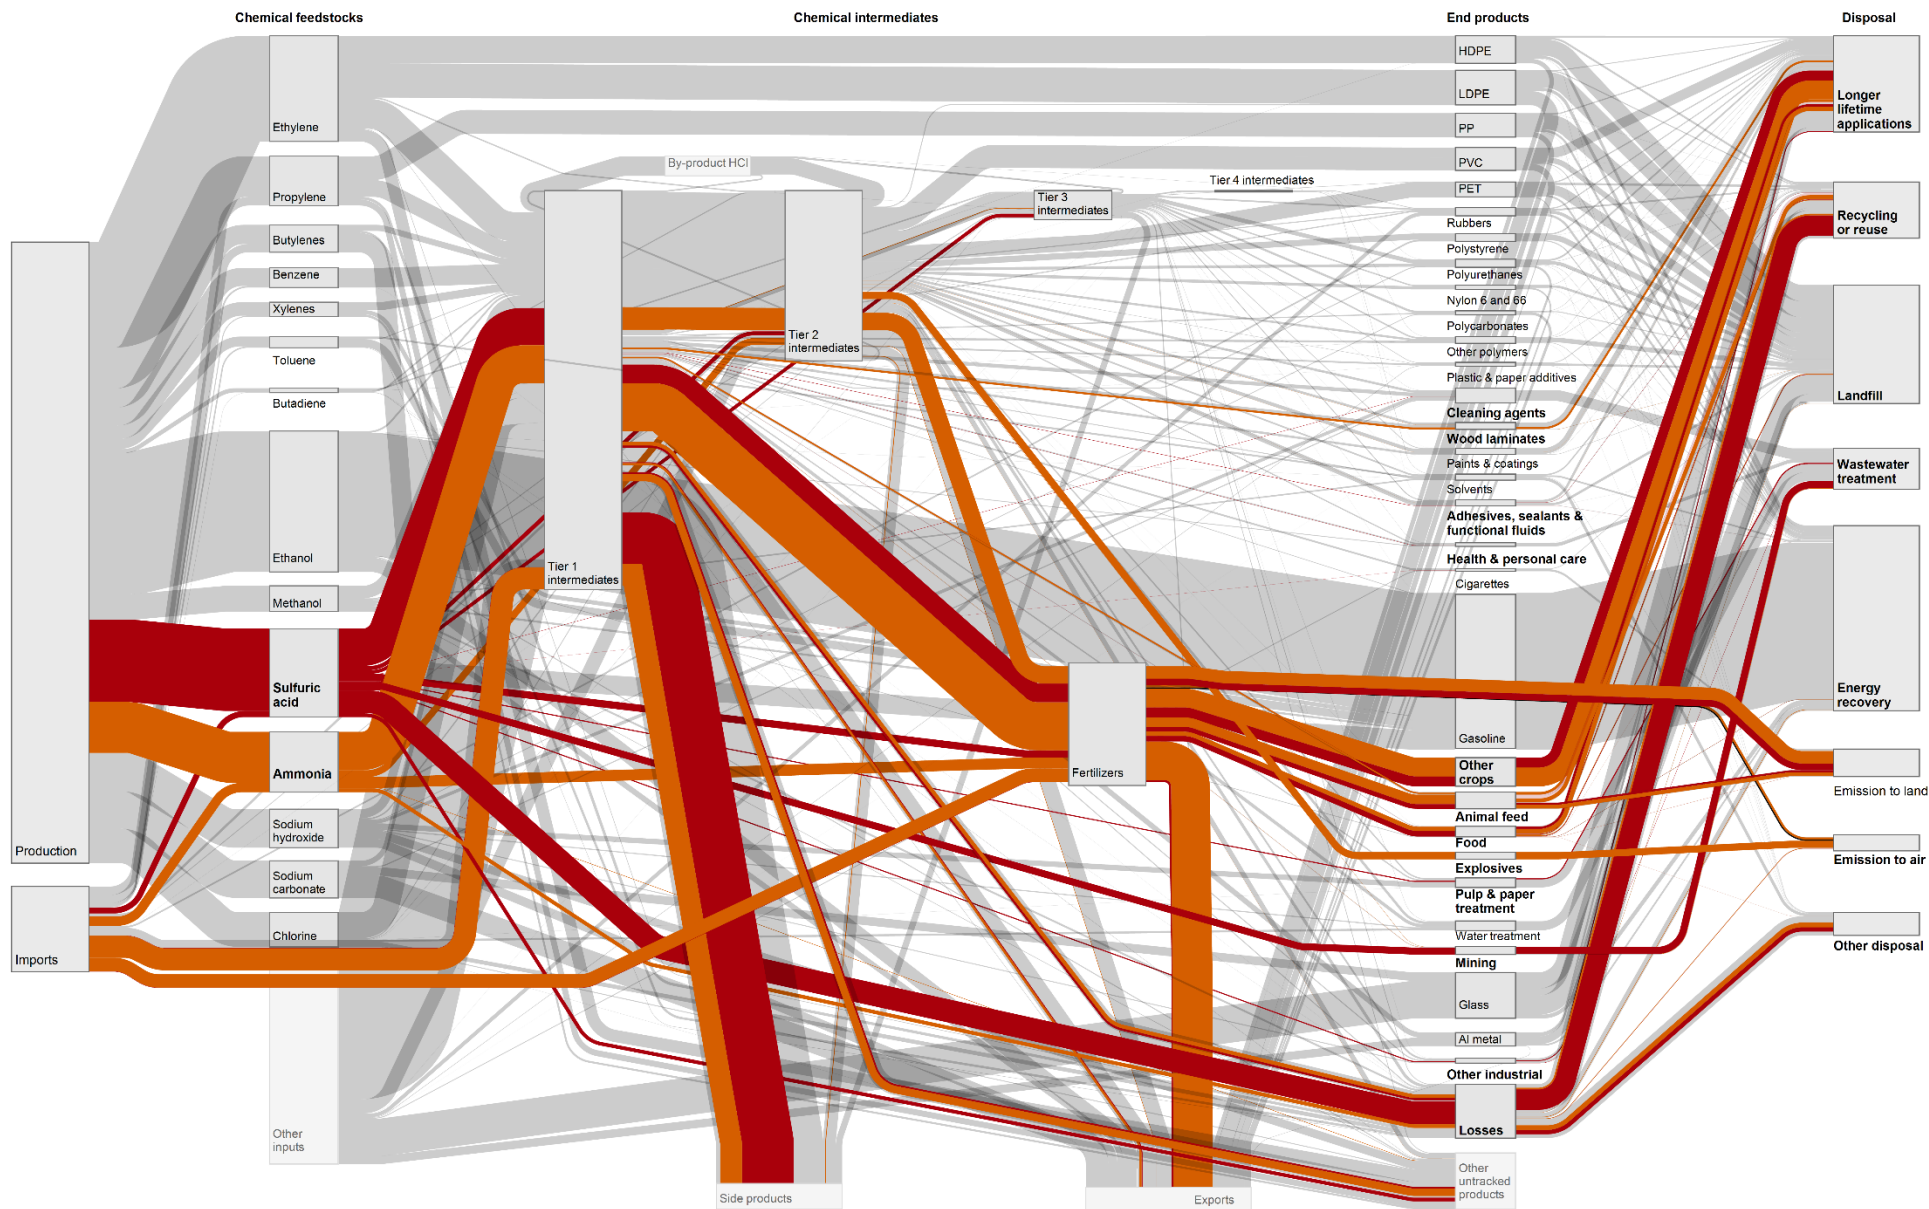

**Figure S5.** Sankey diagram highlighting the flow of sulfuric acid and ammonia in the U.S. in million metric tons from production through to intermediates, final products, and disposal. Bolded text indicates the relevant end-products and disposal types for sulfuric acid or ammonia. “Other inputs” include feedstocks beyond those listed in the study, such as oxygen, water, hydrogen, or carbon monoxide. “Side products” include by-products that are generated due to chemical reaction stoichiometry, such as carbon dioxide or water. Abbreviations: HCl – hydrochloric acid; HDPE – high density polyethylene; LDPE – low density polyethylene; PP – polypropylene; PVC – polyvinyl chloride; PET – polyethylene terephthalate; Al – aluminum.

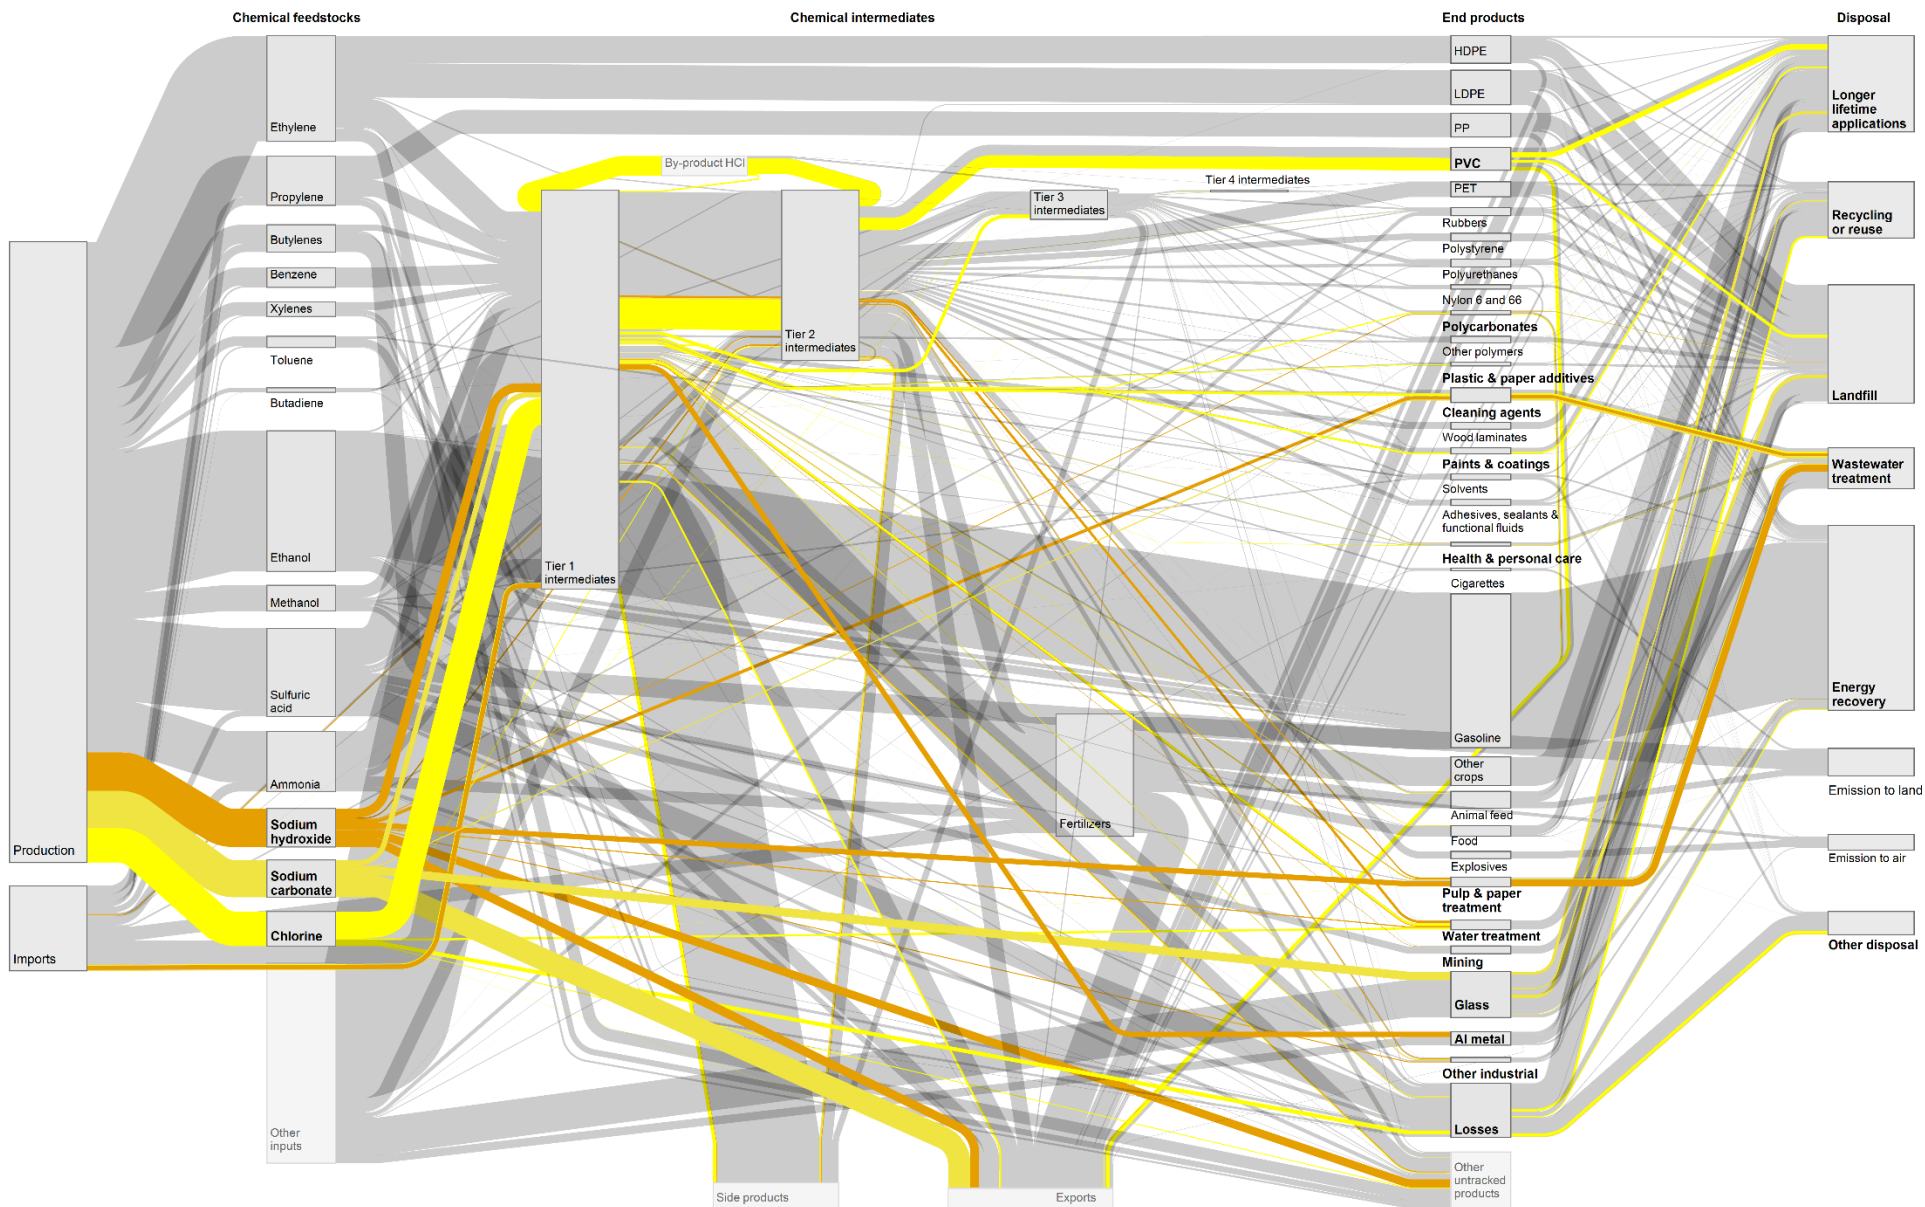

**Figure S6.** Sankey diagram highlighting the flow of chlor-alkali (sodium hydroxide and chlorine) and sodium carbonate in the U.S. in million metric tons from production through to intermediates, final products, and disposal. Bolded text indicates the relevant end-products and disposal types for chlor-alkali or sodium carbonate. “Other inputs” include feedstocks beyond those listed in the study, such as oxygen, water, hydrogen, or carbon monoxide. “Side products” include by-products that are generated due to chemical reaction stoichiometry, such as carbon dioxide or water. Abbreviations: HCl – hydrochloric acid; HDPE – high density polyethylene; LDPE – low density polyethylene; PP – polypropylene; PVC – polyvinyl chloride; PET – polyethylene terephthalate; Al – aluminum.

**Table S1.** Overview of the data sources and assumptions used to estimate the production and consumption of chemicals, intermediates, and end-products in this study (continues to page S12). Y = yes; N = no; N/A = not available.

| Entry                           | Product-ion data? | Consumption data? | Ref.    | Notes                                                                                                                                                                                                                                                                                                                                                                                                                                                                      |
|---------------------------------|-------------------|-------------------|---------|----------------------------------------------------------------------------------------------------------------------------------------------------------------------------------------------------------------------------------------------------------------------------------------------------------------------------------------------------------------------------------------------------------------------------------------------------------------------------|
| <b>Ethylene</b>                 | Y                 | Y                 | 1–3     |                                                                                                                                                                                                                                                                                                                                                                                                                                                                            |
| High density polyethylene       | Y                 | Y                 | 1,4–6   |                                                                                                                                                                                                                                                                                                                                                                                                                                                                            |
| Linear low density polyethylene | Y                 | Y                 | 1,4,6   |                                                                                                                                                                                                                                                                                                                                                                                                                                                                            |
| Low density polyethylene        | Y                 | Y                 | 1,4,6   |                                                                                                                                                                                                                                                                                                                                                                                                                                                                            |
| Ethylene oxide                  | Y                 | Y                 | 1,2     |                                                                                                                                                                                                                                                                                                                                                                                                                                                                            |
| Ethylene dichloride             | Y                 | Y                 | 1,2     |                                                                                                                                                                                                                                                                                                                                                                                                                                                                            |
| Ethylbenzene                    | N                 | N                 | N/A     | Estimated based on ethylene consumption for this end-use and chemical reaction with 100% yield: $C_2H_4 + C_6H_6 \rightarrow C_8H_{10}$ . Production and consumption were assumed to be equal.                                                                                                                                                                                                                                                                             |
| Vinyl acetate                   | Y                 | Y                 | 1       |                                                                                                                                                                                                                                                                                                                                                                                                                                                                            |
| Acetaldehyde                    | N                 | Y                 | 1,2     | Production and consumption were assumed to be equal.                                                                                                                                                                                                                                                                                                                                                                                                                       |
| Ethylene glycol                 | Y                 | Y                 | 1,2     |                                                                                                                                                                                                                                                                                                                                                                                                                                                                            |
| Ethoxylates                     | Y                 | Y                 | 1       |                                                                                                                                                                                                                                                                                                                                                                                                                                                                            |
| Ethanolamines                   | Y                 | Y                 | 1       |                                                                                                                                                                                                                                                                                                                                                                                                                                                                            |
| E-series glycol ethers          | Y                 | Y                 | 1       |                                                                                                                                                                                                                                                                                                                                                                                                                                                                            |
| Polyethylene glycol             | Y                 | Y                 | 1       |                                                                                                                                                                                                                                                                                                                                                                                                                                                                            |
| Polyether polyols               | Y                 | Y                 | 1,4     |                                                                                                                                                                                                                                                                                                                                                                                                                                                                            |
| Vinyl chloride                  | Y                 | Y                 | 1,2     |                                                                                                                                                                                                                                                                                                                                                                                                                                                                            |
| Trichloroethylene               | N                 | N                 | N/A     | Back-calculated based on HFC-125 and HFC-134a requirements using chemical reactions and 100% yield: $C_2HCl_3 + 5HF \rightarrow C_2HF_5 + 3HCl + H_2$ and $C_2HCl_3 + 4HF \rightarrow C_2H_2F_4 + 3HCl$ . Production and consumption were assumed to be equal.                                                                                                                                                                                                             |
| Styrene                         | Y                 | Y                 | 1,2,7   |                                                                                                                                                                                                                                                                                                                                                                                                                                                                            |
| Polyvinyl acetate               | N                 | Y                 | 1,4     | Production and consumption were assumed to be equal.                                                                                                                                                                                                                                                                                                                                                                                                                       |
| Polyvinyl alcohol               | N                 | Y                 | 1       | Production and consumption were assumed to be equal.                                                                                                                                                                                                                                                                                                                                                                                                                       |
| Ethylene vinyl acetate          | N                 | Y                 | 1,4     | Production and consumption were assumed to be equal.                                                                                                                                                                                                                                                                                                                                                                                                                       |
| Ethylene vinyl alcohol          | N                 | Y                 | 1       |                                                                                                                                                                                                                                                                                                                                                                                                                                                                            |
| Polyethylene terephthalate      | Y                 | Y                 | 1,4–6   |                                                                                                                                                                                                                                                                                                                                                                                                                                                                            |
| Antifreeze                      | N                 | N                 | N/A     | Estimated based on ethylene glycol consumption for this end-use. Production and consumption were assumed to be equal.                                                                                                                                                                                                                                                                                                                                                      |
| Polyurethanes                   | Y                 | Y                 | 1,4,6,8 |                                                                                                                                                                                                                                                                                                                                                                                                                                                                            |
| Cleaning agents                 | N                 | N                 | N/A     | Estimated based on the consumption of individual chemicals (ethoxylates, acrylic acid, sodium hydroxide, sodium carbonate, ethanolamine, 2-ethylhexanol, polyethylene glycol, E-series glycol ethers, P-series glycol ethers, ethyleneamines, alkylbenzene, methylamine, methyl chloride, silicones, sulfuric acid, sodium silicate, sodium bicarbonate, sodium hypochlorite, calcium hypochlorite) for this end-use. Production and consumption were assumed to be equal. |
| Herbicides                      | N                 | N                 | N/A     | Estimated based on the consumption of individual chemicals (ethanolamine, butylamines, methyl chloride) for this end-use. Production and consumption were assumed to be equal.                                                                                                                                                                                                                                                                                             |
| Gas treatment                   | N                 | N                 | N/A     | Estimated based on the consumption of individual chemicals (ethanolamine, sodium bicarbonate, ethylene glycol, polyethylene glycol, sodium thiosulfate, sodium sulfite) for this end-use. Production and consumption were assumed to be equal.                                                                                                                                                                                                                             |
| Cement treatment                | N                 | N                 | N/A     | Estimated based on the consumption of individual chemicals (ethanolamine, ethyleneamines, polycarboxylate ethers) for this end-use. Production and consumption were assumed to be equal.                                                                                                                                                                                                                                                                                   |
| Metals and mining               | N                 | N                 | N/A     | Estimated based on the consumption of individual chemicals (ethanolamine, 2-ethylhexanol, polyacrylamide, sulfuric acid, acrylic acid, sodium hydrosulfide, sodium sulfide, hydrofluoric acid, nitric acid, sodium cyanide) for this end-use. Production and consumption were assumed to be equal.                                                                                                                                                                         |
| Ethyleneamines                  | Y                 | Y                 | 1       |                                                                                                                                                                                                                                                                                                                                                                                                                                                                            |
| Brake fluid & lubricants        | N                 | N                 | N/A     | Estimated based on the consumption of individual chemicals (E-series glycol ethers, polyethylene glycol, 2-ethylhexanol, ethyleneamines, silicones, pentaerythritol, methyl isobutyl ketone) for this end-use. Production and consumption were assumed to be equal.                                                                                                                                                                                                        |
| Health care                     | N                 | N                 | N/A     | Estimated based on the consumption of individual chemicals (polyethylene glycol, isopropanol, propylene glycol, methylamine, methylene chloride, acetic anhydride, silicones, methyl cellulose, ethanol,                                                                                                                                                                                                                                                                   |



| Entry                                                            | Product-<br>ion data? | Consum-<br>ption data? | Ref.          | Notes                                                                                                                                                                                                                                                                                                                                                                                                                                                                                                                    |
|------------------------------------------------------------------|-----------------------|------------------------|---------------|--------------------------------------------------------------------------------------------------------------------------------------------------------------------------------------------------------------------------------------------------------------------------------------------------------------------------------------------------------------------------------------------------------------------------------------------------------------------------------------------------------------------------|
|                                                                  |                       |                        |               | sodium bicarbonate) for this end-use. Production and consumption were assumed to be equal.                                                                                                                                                                                                                                                                                                                                                                                                                               |
| Personal care                                                    | N                     | N                      | N/A           | Estimated based on the consumption of individual chemicals (polyethylene glycol, isopropanol, propylene glycol, methylamine, methylene chloride, acetic anhydride, silicones, methyl cellulose, ethanol, sodium bicarbonate) for this end-use. Production and consumption were assumed to be equal.                                                                                                                                                                                                                      |
| Polycarboxylate ethers                                           | N                     | N                      | N/A           |                                                                                                                                                                                                                                                                                                                                                                                                                                                                                                                          |
| Polyvinyl chloride                                               | Y                     | Y                      | 1,4,5         |                                                                                                                                                                                                                                                                                                                                                                                                                                                                                                                          |
| HFC-125                                                          | Y                     | Y                      | 1,9           |                                                                                                                                                                                                                                                                                                                                                                                                                                                                                                                          |
| HFC-134a                                                         | Y                     | Y                      | 1,9           |                                                                                                                                                                                                                                                                                                                                                                                                                                                                                                                          |
| Polystyrene                                                      | Y                     | Y                      | 1,4,5         |                                                                                                                                                                                                                                                                                                                                                                                                                                                                                                                          |
| Acrylonitrile butadiene styrene /<br>styrene-acrylonitrile resin | Y                     | Y                      | 1,4           |                                                                                                                                                                                                                                                                                                                                                                                                                                                                                                                          |
| Styrene-butadiene rubber                                         | Y                     | Y                      | 1,4           |                                                                                                                                                                                                                                                                                                                                                                                                                                                                                                                          |
| Paints & surface coatings                                        | N                     | N                      | N/A           | Estimated based on the consumption of individual chemicals (polyvinyl acetate, acrylate esters, isophthalic acid, melamine, ethyleneamines, titanium dioxide, carbon black, E-series glycol ethers, P-series glycol ethers, methyl methacrylate, benzoic acid, phthalic anhydride, methylene chloride, silicones, pentaerythritol, silicas, sodium bicarbonate, epichlorohydrin, n-methyl-2-pyrrolidone, methyl isobutyl ketone, n-butyl acetate) for this end-use. Production and consumption were assumed to be equal. |
| Adhesives & sealants                                             | N                     | N                      | N/A           | Estimated based on the consumption of individual chemicals (polyvinyl acetate, polyvinyl alcohol, acrylate esters, polyvinyl butyrate, bisphenol A, methylene chloride, silicones, pentaerythritol, methyl cellulose, melamine, epichlorohydrin) for this end-use. Production and consumption were assumed to be equal.                                                                                                                                                                                                  |
| Paper coatings & additives                                       | N                     | N                      | N/A           | Estimated based on the consumption of individual chemicals (polyvinyl acetate, acrylate esters, polyacrylamide, titanium dioxide, carbon black, styrene-butadiene latex, silicones, ethanol, polyvinyl alcohol) for this end-use. Production and consumption were assumed to be equal.                                                                                                                                                                                                                                   |
| Polyvinyl butyral                                                | Y                     | Y                      | 1             |                                                                                                                                                                                                                                                                                                                                                                                                                                                                                                                          |
| Plastic additives                                                | N                     | N                      | N/A           | Estimated based on the consumption of individual chemicals (polyvinyl alcohol, acrylate esters, titanium dioxide, carbon black, 2-ethylhexanol, acrylic acid, benzoic acid, butanol, butylamines) for this end-use. Production and consumption were assumed to be equal.                                                                                                                                                                                                                                                 |
| <b>Propylene</b>                                                 | <b>Y</b>              | <b>Y</b>               | <b>1,2,10</b> |                                                                                                                                                                                                                                                                                                                                                                                                                                                                                                                          |
| Polypropylene                                                    | Y                     | Y                      | 1,4,5         |                                                                                                                                                                                                                                                                                                                                                                                                                                                                                                                          |
| Propylene oxide                                                  | Y                     | Y                      | 1             |                                                                                                                                                                                                                                                                                                                                                                                                                                                                                                                          |
| Acrylonitrile                                                    | Y                     | Y                      | 1,2           |                                                                                                                                                                                                                                                                                                                                                                                                                                                                                                                          |
| Cumene                                                           | Y                     | Y                      | 1,11          |                                                                                                                                                                                                                                                                                                                                                                                                                                                                                                                          |
| Acrylic acid                                                     | Y                     | Y                      | 1,12          |                                                                                                                                                                                                                                                                                                                                                                                                                                                                                                                          |
| 2-ethylhexanol                                                   | Y                     | Y                      | 1,2           |                                                                                                                                                                                                                                                                                                                                                                                                                                                                                                                          |
| Isopropanol                                                      | Y                     | Y                      | 1,2           |                                                                                                                                                                                                                                                                                                                                                                                                                                                                                                                          |
| Butanol                                                          | Y                     | Y                      | 1,2           |                                                                                                                                                                                                                                                                                                                                                                                                                                                                                                                          |
| Epichlorohydrin                                                  | Y                     | Y                      | 1,2           |                                                                                                                                                                                                                                                                                                                                                                                                                                                                                                                          |
| Propylene glycol                                                 | Y                     | Y                      | 1,13          |                                                                                                                                                                                                                                                                                                                                                                                                                                                                                                                          |
| Butanediol                                                       | Y                     | Y                      | 1,2           |                                                                                                                                                                                                                                                                                                                                                                                                                                                                                                                          |
| P-series glycol ethers                                           | Y                     | Y                      | 1             |                                                                                                                                                                                                                                                                                                                                                                                                                                                                                                                          |
| Acrylamide                                                       | Y                     | Y                      | 1,14          |                                                                                                                                                                                                                                                                                                                                                                                                                                                                                                                          |
| Adiponitrile                                                     | Y                     | Y                      | 1             |                                                                                                                                                                                                                                                                                                                                                                                                                                                                                                                          |
| Nitrile rubber                                                   | Y                     | Y                      | 1             |                                                                                                                                                                                                                                                                                                                                                                                                                                                                                                                          |
| Carbon fiber                                                     | Y                     | Y                      | 1,15          |                                                                                                                                                                                                                                                                                                                                                                                                                                                                                                                          |
| Phenol                                                           | Y                     | Y                      | 1,2           |                                                                                                                                                                                                                                                                                                                                                                                                                                                                                                                          |
| Acetone                                                          | Y                     | Y                      | 1,2           |                                                                                                                                                                                                                                                                                                                                                                                                                                                                                                                          |
| Acrylate esters                                                  | Y                     | Y                      | 1             |                                                                                                                                                                                                                                                                                                                                                                                                                                                                                                                          |
| Superabsorbent polymers                                          | Y                     | Y                      | 1,16          |                                                                                                                                                                                                                                                                                                                                                                                                                                                                                                                          |
| Solvents                                                         | N                     | N                      | N/A           | Estimated based on the consumption of individual chemicals (2-ethylhexanol, isopropanol, butanol, tetrahydrofuran, ethanol, methanol, acetone, n-methyl-2-pyrrolidone, methyl isobutyl ketone, toluene) for this end-use. Production and consumption were assumed to be equal.                                                                                                                                                                                                                                           |
| Methyl isobutyl ketone                                           | Y                     | Y                      | 1,2           |                                                                                                                                                                                                                                                                                                                                                                                                                                                                                                                          |
| n-butyl acetate                                                  | Y                     | Y                      | 1,17          |                                                                                                                                                                                                                                                                                                                                                                                                                                                                                                                          |
| Butylamines                                                      | Y                     | Y                      | 1             |                                                                                                                                                                                                                                                                                                                                                                                                                                                                                                                          |

| Entry                            | Product-<br>ion data? | Consum-<br>ption data? | Ref.          | Notes                                                                                                                                                                                                                             |
|----------------------------------|-----------------------|------------------------|---------------|-----------------------------------------------------------------------------------------------------------------------------------------------------------------------------------------------------------------------------------|
| Tetrahydrofuran                  | Y                     | Y                      | 1,2           |                                                                                                                                                                                                                                   |
| Gamma-butyrolactone              | N                     | N                      | N/A           | Estimated from known butanediol consumption using chemical reaction with 100% yield: $C_4H_{10}O_2 \rightarrow C_4H_6O_2 + 2H_2$ and 100%. Production and consumption were assumed to be equal.                                   |
| Polybutylene terephthalate       | Y                     | Y                      | 1,4           |                                                                                                                                                                                                                                   |
| Polyacrylamide                   | Y                     | Y                      | 1             |                                                                                                                                                                                                                                   |
| Hexamethylene diamine            | Y                     | Y                      | 1,2           |                                                                                                                                                                                                                                   |
| Bisphenol A                      | Y                     | Y                      | 1,2,18        |                                                                                                                                                                                                                                   |
| Methyl methacrylate              | Y                     | Y                      | 1             |                                                                                                                                                                                                                                   |
| Pesticides                       | N                     | N                      | N/A           | Estimated based on the consumption of individual chemicals (butylamines, methylamine) for this end-use.                                                                                                                           |
| N-methyl-2-pyrrolidone           | N                     | N                      | N/A           | Estimated from known gamma-butyrolactone consumption using chemical reaction with 100% yield: $C_4H_6O_2 + CH_3N \rightarrow C_5H_9NO + H_2O$ and 100% yield.                                                                     |
| Polycarbonate                    | Y                     | Y                      | 1,4,19        |                                                                                                                                                                                                                                   |
| Polymethyl methacrylate          | Y                     | Y                      | 1,4           |                                                                                                                                                                                                                                   |
| <b>Butylenes</b>                 | <b>Y</b>              | <b>Y</b>               | <b>1,20</b>   |                                                                                                                                                                                                                                   |
| Gasoline                         | N                     | N                      | N/A           | Estimated based on the consumption of individual chemicals (butylenes, toluene, methyl tert butyl ether, ethyleneamines, polyacrylamide, ethanol, xylenes) for this end-use. Production and consumption were assumed to be equal. |
| Methyl tert-butyl ether          | Y                     | Y                      | 1,2,21        |                                                                                                                                                                                                                                   |
| Ethyl tert-butyl ether           | Y                     | Y                      | 1,22          |                                                                                                                                                                                                                                   |
| Butyl rubber and polyisobutylene | Y                     | Y                      | 1,4           |                                                                                                                                                                                                                                   |
| <b>Butadiene</b>                 | <b>Y</b>              | <b>Y</b>               | <b>1,2,20</b> |                                                                                                                                                                                                                                   |
| Polybutadiene                    | Y                     | Y                      | 1,4           |                                                                                                                                                                                                                                   |
| <b>Benzene</b>                   | <b>Y</b>              | <b>Y</b>               | <b>1,2,23</b> |                                                                                                                                                                                                                                   |
| Nitrobenzene                     | Y                     | Y                      | 1,2           |                                                                                                                                                                                                                                   |
| Cyclohexanol / cyclohexanone     | N                     | N                      | N/A           | Estimated from known benzene consumption and chemical reaction: $2C_6H_6 + 5H_2 + O_2 \rightarrow C_6H_{12}O + C_6H_{10}O$ . Production and consumption were assumed to be equal.                                                 |
| Alkylbenzene                     | Y                     | Y                      | 1             |                                                                                                                                                                                                                                   |
| Aniline                          | Y                     | Y                      | 1,2           |                                                                                                                                                                                                                                   |
| Adipic acid                      | Y                     | Y                      | 1,2           |                                                                                                                                                                                                                                   |
| Caprolactam                      | Y                     | Y                      | 1,2           |                                                                                                                                                                                                                                   |
| Methylene diphenyl diisocyanate  | Y                     | Y                      | 1,2,24        |                                                                                                                                                                                                                                   |
| Nylon 6 / 66                     | Y                     | Y                      | 1,4           |                                                                                                                                                                                                                                   |
| <b>Toluene</b>                   | <b>Y</b>              | <b>Y</b>               | <b>1,2</b>    |                                                                                                                                                                                                                                   |
| Toluene diisocyanate             | Y                     | Y                      | 1,2,25        |                                                                                                                                                                                                                                   |
| Benzoic acid                     | Y                     | Y                      | 1,26          |                                                                                                                                                                                                                                   |
| Sodium / potassium benzoate      | N                     | N                      | N/A           | Estimated from known toluene consumption and chemical reaction with 100% yield: $C_7H_6O_2 + NaOH \rightarrow C_7H_5NaO_2 + H_2O$ . Production and consumption were assumed to be equal.                                          |
| <b>Xylenes</b>                   | <b>Y</b>              | <b>Y</b>               | <b>1,2</b>    |                                                                                                                                                                                                                                   |
| Isophthalic acid                 | Y                     | Y                      | 1,2           |                                                                                                                                                                                                                                   |
| Terephthalic acid                | Y                     | Y                      | 1,2           |                                                                                                                                                                                                                                   |
| Dimethyl terephthalate           | Y                     | Y                      | 1             |                                                                                                                                                                                                                                   |
| Phthalic anhydride               | Y                     | Y                      | 1,2           |                                                                                                                                                                                                                                   |
| <b>Methanol</b>                  | <b>Y</b>              | <b>Y</b>               | <b>1,2,27</b> |                                                                                                                                                                                                                                   |
| Formaldehyde                     | Y                     | Y                      | 1,2,28        |                                                                                                                                                                                                                                   |
| Acetic acid                      | Y                     | Y                      | 1,2           |                                                                                                                                                                                                                                   |
| Biodiesel                        | N                     | N                      | N/A           | Estimated based on the consumption of methanol for this end-use. Production and consumption were assumed to be equal.                                                                                                             |
| Methylamines                     | N                     | N                      | N/A           | Estimated based on the consumption of methanol for this end-use. Production and consumption were assumed to be equal.                                                                                                             |
| Methyl chloride                  | Y                     | Y                      | 1,2,20        |                                                                                                                                                                                                                                   |
| Polyacetal resins                | Y                     | Y                      | 1,4           |                                                                                                                                                                                                                                   |
| Pentaerythritol                  | Y                     | Y                      | 1,20          |                                                                                                                                                                                                                                   |
| Acetic anhydride                 | Y                     | Y                      | 1,2           |                                                                                                                                                                                                                                   |
| Methylene chloride               | Y                     | Y                      | 1,29          |                                                                                                                                                                                                                                   |
| Methyl chlorosilanes             | N                     | N                      | N/A           | Estimated based on the consumption of methyl chloride for this end-use. Production and consumption were assumed to be equal.                                                                                                      |
| Methyl cellulose                 | Y                     | Y                      | 1             |                                                                                                                                                                                                                                   |
| Cellulose acetates               | Y                     | Y                      | 1,30          |                                                                                                                                                                                                                                   |

| Entry                             | Product-ion data? | Consumption data? | Ref.           | Notes                                                                                                                                                                                                                                                                                                                                                                                                                            |
|-----------------------------------|-------------------|-------------------|----------------|----------------------------------------------------------------------------------------------------------------------------------------------------------------------------------------------------------------------------------------------------------------------------------------------------------------------------------------------------------------------------------------------------------------------------------|
| Cigarettes                        | N                 | N                 | N/A            | Estimated assuming that 100% of cellulose acetates are consumed for this end-use. Production and consumption were assumed to be equal.                                                                                                                                                                                                                                                                                           |
| Chloroform                        | Y                 | Y                 | 1,2            |                                                                                                                                                                                                                                                                                                                                                                                                                                  |
| HFC-32                            | Y                 | Y                 | 1,9            |                                                                                                                                                                                                                                                                                                                                                                                                                                  |
| Silicones                         | Y                 | Y                 | 1              |                                                                                                                                                                                                                                                                                                                                                                                                                                  |
| Carbon tetrachloride              | Y                 | Y                 | 1,31           |                                                                                                                                                                                                                                                                                                                                                                                                                                  |
| HCFC-22                           | Y                 | Y                 | 1              |                                                                                                                                                                                                                                                                                                                                                                                                                                  |
| Refrigerants and air conditioning | N                 | N                 | N/A            | Estimated based on the consumption of individual chemicals (HFC-32, HCFC-22, HFC-125, HFC-134a, carbon tetrachloride, and hydrofluoric acid) for this end-use. Production and consumption were assumed to be equal.                                                                                                                                                                                                              |
| Fluoropolymers                    | N                 | N                 | N/A            | Estimated based on the consumption of HCFC-22 for this end-use. Production and consumption were assumed to be equal.                                                                                                                                                                                                                                                                                                             |
| Silicone rubbers and elastomers   | N                 | N                 | N/A            | Estimated based on the consumption of silicones for this end-use. Production and consumption were assumed to be equal.                                                                                                                                                                                                                                                                                                           |
| <b>Ethanol</b>                    | <b>Y</b>          | <b>Y</b>          | <b>1,32</b>    |                                                                                                                                                                                                                                                                                                                                                                                                                                  |
| Food                              | N                 | N                 | 33             | Estimated based on the consumption of individual chemicals (ethanol, silicas, sodium bicarbonate, fertilizers, sodium/potassium benzoate) for this end-use; food mass itself is not included. 19% of total fertilizer was assumed to be used for food based on the distribution of U.S. crop growth by end-use (data in ref. at left). Production and consumption were assumed to be equal.                                      |
| <b>Ammonia</b>                    | <b>Y</b>          | <b>Y</b>          | <b>1,34,35</b> |                                                                                                                                                                                                                                                                                                                                                                                                                                  |
| Ammonia fertilizer                | Y                 | Y                 | 1,35           |                                                                                                                                                                                                                                                                                                                                                                                                                                  |
| Urea                              | Y                 | Y                 | 1,35           |                                                                                                                                                                                                                                                                                                                                                                                                                                  |
| Nitric acid                       | Y                 | Y                 | 1,35           |                                                                                                                                                                                                                                                                                                                                                                                                                                  |
| Ammonium phosphate fertilizers    | Y                 | Y                 | 1,35           |                                                                                                                                                                                                                                                                                                                                                                                                                                  |
| Complex NPK fertilizers           | Y                 | Y                 | 1,35           |                                                                                                                                                                                                                                                                                                                                                                                                                                  |
| Ammonium sulfate fertilizers      | Y                 | Y                 | 1,35           |                                                                                                                                                                                                                                                                                                                                                                                                                                  |
| Hydrogen cyanide                  | Y                 | Y                 | 1,36           |                                                                                                                                                                                                                                                                                                                                                                                                                                  |
| Urea-based fertilizers            | Y                 | Y                 | 35             |                                                                                                                                                                                                                                                                                                                                                                                                                                  |
| Fertilizers                       | N                 | N                 | N/A            | Estimated based on the consumption of individual chemicals (ammonia fertilizers, ammonium phosphate fertilizers, complex NPK fertilizers, ammonium sulfate fertilizers, ammonium nitrate fertilizers, urea based fertilizers) for this end-use; losses from plant growth (70% nitrogen use efficiency) are accounted for. Production and consumption were assumed to be equal.                                                   |
| Animal feeds                      | N                 | N                 | 33             | Estimated based on the consumption of individual chemicals (urea, phosphoric acid, sodium bicarbonate, methylamine, acetaldehyde, silicas, fertilizers) for this end-use; biomass weight itself is not included. 26% of total fertilizer was assumed to be used for animal feed production based on the distribution of U.S. crop growth by end-use (data in ref. at left). Production and consumption were assumed to be equal. |
| Other crops                       | N                 | N                 | 33             | Estimated based on the consumption of fertilizers for this end-use; crop mass itself is not included. 55% of total fertilizer was assumed to be used for other crops based on the distribution of U.S. crop growth by end-use (data in ref. at left). Production and consumption were assumed to be equal.                                                                                                                       |
| Melamine                          | Y                 | Y                 | 1              |                                                                                                                                                                                                                                                                                                                                                                                                                                  |
| Ammonium nitrate                  | Y                 | Y                 | 1,35,37        |                                                                                                                                                                                                                                                                                                                                                                                                                                  |
| Sodium cyanide                    | Y                 | Y                 | 1              |                                                                                                                                                                                                                                                                                                                                                                                                                                  |
| Wood laminates                    | N                 | N                 | N/A            | Estimated based on the consumption of individual chemicals (melamine, formaldehyde, urea, butanol, phenol, ethanolamine) for this end-use; wood mass itself is not included. Production and consumption were assumed to be equal.                                                                                                                                                                                                |
| Ammonium nitrate fertilizers      | Y                 | Y                 | 1,35,37        |                                                                                                                                                                                                                                                                                                                                                                                                                                  |
| Ammonium nitrate explosives       | Y                 | Y                 | 1              |                                                                                                                                                                                                                                                                                                                                                                                                                                  |
| <b>Chlorine</b>                   | <b>Y</b>          | <b>Y</b>          | <b>1,38</b>    |                                                                                                                                                                                                                                                                                                                                                                                                                                  |
| Phosgene                          | Y                 | Y                 | 1,2,39         |                                                                                                                                                                                                                                                                                                                                                                                                                                  |
| Aluminum chloride                 | Y                 | Y                 | 1              |                                                                                                                                                                                                                                                                                                                                                                                                                                  |
| Sodium hypochlorite               | Y                 | Y                 | 1,40           |                                                                                                                                                                                                                                                                                                                                                                                                                                  |
| Calcium hypochlorite              | Y                 | Y                 | 1,41           |                                                                                                                                                                                                                                                                                                                                                                                                                                  |
| Titanium dioxide                  | Y                 | Y                 | 1,42           |                                                                                                                                                                                                                                                                                                                                                                                                                                  |
| Pulp and paper treatment          | N                 | N                 | N/A            | Estimated based on the consumption of individual chemicals (chlorine, sodium hydroxide, polyvinyl acetate, methylamine, aluminum chloride,                                                                                                                                                                                                                                                                                       |

| Entry                   | Product-<br>ion data? | Consum-<br>ption data? | Ref.           | Notes                                                                                                                                                                                                                                                                                                                                         |
|-------------------------|-----------------------|------------------------|----------------|-----------------------------------------------------------------------------------------------------------------------------------------------------------------------------------------------------------------------------------------------------------------------------------------------------------------------------------------------|
|                         |                       |                        |                | sulfuric acid, aluminum sulfate, sodium aluminate, sodium hydrosulfide, sodium hydrosulfite, sodium sulfide, sodium sulfite, sodium silicate, silicas) for this end-use. Production and consumption were assumed to be equal.                                                                                                                 |
| Water treatment         | N                     | N                      | N/A            | Estimated based on the consumption of individual chemicals (chlorine, sodium hydroxide, acrylic acid, polyacrylamide, methylamine, aluminum chloride, sodium hypochlorite, aluminum sulfate, sodium aluminate, sodium sulfite, sodium thiosulfate, sodium bicarbonate) for this end-use. Production and consumption were assumed to be equal. |
| Catalysts               | N                     | N                      | N/A            | Estimated based on the consumption of individual chemicals (aluminum chloride, sodium aluminate, sodium silicate, silicas) for end-use. Production and consumption were assumed to be equal.                                                                                                                                                  |
| <b>Sodium hydroxide</b> | <b>Y</b>              | <b>Y</b>               | <b>1,43,44</b> |                                                                                                                                                                                                                                                                                                                                               |
| Aluminum oxide          | Y                     | Y                      | 45             |                                                                                                                                                                                                                                                                                                                                               |
| Sodium hydrosulfide     | Y                     | Y                      | 1              |                                                                                                                                                                                                                                                                                                                                               |
| Sodium hydrosulfite     | Y                     | Y                      | 1              |                                                                                                                                                                                                                                                                                                                                               |
| Sodium sulfide          | Y                     | Y                      | 1              |                                                                                                                                                                                                                                                                                                                                               |
| Sodium sulfite          | Y                     | Y                      | 1              |                                                                                                                                                                                                                                                                                                                                               |
| Sodium thiosulfate      | Y                     | Y                      | 1              |                                                                                                                                                                                                                                                                                                                                               |
| Textiles processing     | N                     | N                      | N/A            | Estimated based on the consumption of individual chemicals (sodium hydroxide, sodium hydrosulfite) for this end-use. Production and consumption were assumed to be equal.                                                                                                                                                                     |
| Aluminum metal          | Y                     | Y                      | 46             |                                                                                                                                                                                                                                                                                                                                               |
| Aluminum sulfate        | Y                     | Y                      | 1,47           |                                                                                                                                                                                                                                                                                                                                               |
| Sodium aluminate        | Y                     | Y                      | 1              |                                                                                                                                                                                                                                                                                                                                               |
| <b>Sulfuric acid</b>    | <b>Y</b>              | <b>Y</b>               | <b>1,48,49</b> |                                                                                                                                                                                                                                                                                                                                               |
| Phosphoric acid         | Y                     | Y                      | 1,50           |                                                                                                                                                                                                                                                                                                                                               |
| Hydrofluoric acid       | Y                     | Y                      | 1              |                                                                                                                                                                                                                                                                                                                                               |
| Lead acid batteries     | N                     | N                      | N/A            | Estimated based on the consumption of individual chemicals (sulfuric acid, silicas) for this end-use; other non-chemical components were not included. Production and consumption were assumed to be equal.                                                                                                                                   |
| <b>Sodium carbonate</b> | <b>Y</b>              | <b>Y</b>               | <b>1,51,52</b> |                                                                                                                                                                                                                                                                                                                                               |
| Glass, flat             | Y                     | Y                      | 53–55          |                                                                                                                                                                                                                                                                                                                                               |
| Glass, container        | Y                     | Y                      | 53–55          |                                                                                                                                                                                                                                                                                                                                               |
| Glass, other            | Y                     | Y                      | 53–55          |                                                                                                                                                                                                                                                                                                                                               |
| Sodium silicate         | Y                     | Y                      | 1,56           |                                                                                                                                                                                                                                                                                                                                               |
| Sodium bicarbonate      | Y                     | Y                      | 1              |                                                                                                                                                                                                                                                                                                                                               |
| Silicas                 | Y                     | Y                      | 1,57           |                                                                                                                                                                                                                                                                                                                                               |
| Adsorbents              | N                     | N                      | N/A            | Estimated based on the consumption of individual chemicals (sodium silicate, silicas) for this end-use. Production and consumption were assumed to be equal.                                                                                                                                                                                  |

**Table S2.** End-of-life assumptions for the end-products included in this study (continues to page S15). N/A = not available.

| End-product                    | Dispose (%) | Longer life (%) | Land -fill (%) | Recycle or reuse (%) | Energy recover (%) | Incin-erate (%) | Emit to air (%) | Emit to land (%) | Emit to water (%) | Waste-water (%) | Other (%) | Notes                                                                                                                                                                                                                      | Ref.  |
|--------------------------------|-------------|-----------------|----------------|----------------------|--------------------|-----------------|-----------------|------------------|-------------------|-----------------|-----------|----------------------------------------------------------------------------------------------------------------------------------------------------------------------------------------------------------------------------|-------|
| ABS & other resins             | 87          | 13              | 70             | 22                   | 8                  | 0               | 0               | 0                | 0                 | 0               | 0         | Data from 2019.                                                                                                                                                                                                            | 6     |
| Adhesives & sealants           | 6           | 94              | 100            | 0                    | 0                  | 0               | 0               | 0                | 0                 | 0               | 0         | Assume products go to electronics (5-year lifetime), construction (50-year), and consumer products (1-year), for average of 17 years. All disposed is landfilled.                                                          | N/A   |
| Adsorbents                     | 100         | 0               | 100            | 0                    | 0                  | 0               | 0               | 0                | 0                 | 0               | 0         | Assume all are landfilled.                                                                                                                                                                                                 | N/A   |
| Aluminum metal                 | 86.5        | 13.5            | 68             | 17                   | 14                 | 0               | 0               | 0                | 0                 | 0               | 1         | Data from 2018.                                                                                                                                                                                                            | 58    |
| Animal feed                    | 75          | 25              | 0              | 50                   | 0                  | 0               | 0               | 50               | 0                 | 0               | 0         | Using nitrogen use efficiency of livestock, assume 75% of incoming feed is released as manure. Half is reused as fertilizer while the other half is disposed.                                                              | 59    |
| Antifreeze                     | 100         | 0               | 88             | 12                   | 0                  | 0               | 0               | 0                | 0                 | 0               | 0         | Data from 1999.                                                                                                                                                                                                            | 60    |
| Biodiesel                      | 100         | 0               | 0              | 0                    | 100                | 0               | 0               | 0                | 0                 | 0               | 0         | Assume biodiesel is burned for energy.                                                                                                                                                                                     | N/A   |
| Brake fluid & lubricants       | 100         | 0               | 0              | 40                   | 46                 | 0               | 0               | 0                | 14                | 0               | 0         | Data from 2006.                                                                                                                                                                                                            | 61    |
| Carbon fiber                   | 30          | 70              | 98             | 0                    | 0                  | 2               | 0               | 0                | 0                 | 0               | 0         | 30% loss during manufacturing. Assume 50-year lifetime in durable goods.                                                                                                                                                   | 62,63 |
| Catalysts                      | 50          | 50              | 70             | 30                   | 0                  | 0               | 0               | 0                | 0                 | 0               | 0         | Assume 2-year lifetime. Data from 1996.                                                                                                                                                                                    | 64    |
| Cement & concrete              | 100         | 0               | 0              | 0                    | 0                  | 0               | 0               | 0                | 0                 | 100             | 0         | Assume all chemicals used for grinding end up in wastewater treatment.                                                                                                                                                     | N/A   |
| Cigarettes                     | 100         | 0               | 25             | 0                    | 0                  | 0               | 0               | 75               | 0                 | 0               | 0         | Data from 2009.                                                                                                                                                                                                            | 65    |
| Cleaning agents                | 100         | 0               | 0              | 0                    | 0                  | 0               | 0               | 0                | 2.4               | 97.6            | 0         | Assume all end up in water. 84% sent to wastewater treatment and 16% to septic tanks (U.S. average); ~15% of septic tanks fail, so 2.4% go to groundwater.                                                                 | 66,67 |
| Explosives                     | 100         | 0               | 0              | 0                    | 0                  | 0               | 100             | 0                | 0                 | 0               | 0         | Assume all explosives are detonated and released to the environment.                                                                                                                                                       | N/A   |
| Fertilizer, ammonia            | 30          | 70              | 0              | 0                    | 0                  | 0               | 29              | 71               | 0                 | 0               | 0         | Longer lifetime is based on the nitrogen use efficiency of the U.S. (first ref. at right). Air emissions are based on volatilization rates reported in second ref. at right, with remainder assumed to be emitted to land. | 68,69 |
| Fertilizer, ammonium nitrate   | 30          | 70              | 0              | 0                    | 0                  | 0               | 3               | 97               | 0                 | 0               | 0         | Longer lifetime is based on the nitrogen use efficiency of the U.S. (first ref. at right). Air emissions are based on volatilization rates reported in second ref. at right, with remainder assumed to be emitted to land. | 68,69 |
| Fertilizer, ammonium phosphate | 30          | 70              | 0              | 0                    | 0                  | 0               | 3               | 97               | 0                 | 0               | 0         | Longer lifetime is based on the nitrogen use efficiency of the U.S. (first ref. at right). Air emissions are based on volatilization rates reported in second ref. at right, with remainder assumed to be emitted to land. | 68,69 |
| Fertilizer, ammonium sulfate   | 30          | 70              | 0              | 0                    | 0                  | 0               | 2               | 98               | 0                 | 0               | 0         | Longer lifetime is based on the nitrogen use efficiency of the U.S. (first ref. at right). Air emissions are based on volatilization                                                                                       | 68,69 |

| End-product                 | Dispose (%) | Longer life (%) | Land -fill (%) | Recycle or reuse (%) | Energy recover (%) | Incin-erate (%) | Emit to air (%) | Emit to land (%) | Emit to water (%) | Waste-water (%) | Other (%) | Notes                                                                                                                                                                                                                                                                                                            | Ref.      |
|-----------------------------|-------------|-----------------|----------------|----------------------|--------------------|-----------------|-----------------|------------------|-------------------|-----------------|-----------|------------------------------------------------------------------------------------------------------------------------------------------------------------------------------------------------------------------------------------------------------------------------------------------------------------------|-----------|
| Fertilizer, complex NPK     | 30          | 70              | 0              | 0                    | 0                  | 0               | 3               | 97               | 0                 | 0               | 0         | rates reported in second ref. at right, with remainder assumed to be emitted to land. Longer lifetime is based on the nitrogen use efficiency of the U.S. (first ref. at right). Air emissions are based on volatilization rates reported in second ref. at right, with remainder assumed to be emitted to land. | 68,69     |
| Fertilizer, urea            | 30          | 70              | 0              | 0                    | 0                  | 0               | 32              | 68               | 0                 | 0               | 0         | Longer lifetime is based on the nitrogen use efficiency of the U.S. (first ref. at right). Air emissions are based on volatilization rates reported in second ref. at right, with remainder assumed to be emitted to land.                                                                                       | 68,69     |
| Food                        | 31          | 69              | 37             | 42                   | 9                  | 0               | 0               | 5                | 0                 | 4               | 3         | Data from 2019 includes residential, manufacturing, retailers, and distributors. Recycling includes compost, donation, animal feed, and anaerobic digestion.                                                                                                                                                     | 70        |
| Gas treatment               | 100         | 0               | 0              | 0                    | 0                  | 0               | 0               | 0                | 0                 | 100             | 0         | Assume all consumed amines sent to wastewater treatment.                                                                                                                                                                                                                                                         | N/A       |
| Gasoline                    | 100         | 0               | 0              | 0                    | 100                | 0               | 0               | 0                | 0                 | 0               | 0         | Assume all gasoline is burned for energy.                                                                                                                                                                                                                                                                        | N/A       |
| Glass, container            | 100         | 0               | 55             | 31                   | 13                 | 0               | 0               | 0                | 0                 | 0               | 0         | Data from 2018.                                                                                                                                                                                                                                                                                                  | N/A       |
| Glass, flat                 | 51          | 49              | 86             | 0                    | 13                 | 0               | 0               | 0                | 0                 | 0               | 0         | Data from 2018 for "durable" glass.                                                                                                                                                                                                                                                                              | 58        |
| Glass, other                | 3           | 97              | 100            | 0                    | 0                  | 0               | 0               | 0                | 0                 | 0               | 0         | Assumed to be fiberglass for insulation (50-year lifetime) and automotives (10-year) for average of 30 years.                                                                                                                                                                                                    | N/A       |
| HDPE                        | 92          | 8               | 78             | 9                    | 13                 | 0               | 0               | 0                | 0                 | 0               | 1         | Average from refs. (2015, 2018-2019).                                                                                                                                                                                                                                                                            | 5,6,58,71 |
| Health care                 | 100         | 0               | 3              | 0                    | 0                  | 0               | 0               | 0                | 2.3               | 94.7            | 0         | 3% of production thrown away; assume remainder sent to wastewater and septic tanks (see cleaning agents).                                                                                                                                                                                                        | 72        |
| Herbicides                  | 100         | 0               | 0              | 0                    | 0                  | 0               | 0               | 0                | 100               | 0               | 0         | Herbicides kill aqueous weeds, so assume all ends up in water.                                                                                                                                                                                                                                                   | N/A       |
| LDPE                        | 96          | 4               | 79             | 4                    | 14.5               | 0               | 0               | 0                | 0                 | 0               | 1         | Average from refs. (2015, 2018-2019).                                                                                                                                                                                                                                                                            | 5,6,58,71 |
| LLDPE                       | 96          | 4               | 79             | 5                    | 14.5               | 0               | 0               | 0                | 0                 | 0               | 1         | Average from refs. (2015, 2018-2019).                                                                                                                                                                                                                                                                            | 5,6,58,71 |
| Lead acid batteries         | 20          | 80              | 0              | 0                    | 0                  | 0               | 0               | 0                | 0                 | 100             | 0         | Assume 5-year lifetime and that batteries are recycled, during which sulfuric acid is neutralized and sent to wastewater.                                                                                                                                                                                        | 58        |
| Losses, ammonia             | 100         | 0               | 3              | 21                   | 12                 | 13              | 0               | 0                | 0                 | 0               | 51        | Data from 2021.                                                                                                                                                                                                                                                                                                  | 73        |
| Losses, benzene             | 100         | 0               | 0              | 47                   | 16                 | 1               | 2               | 0                | 0                 | 0               | 34        | Data from 2021.                                                                                                                                                                                                                                                                                                  | 73        |
| Losses, butanol             | 100         | 0               | 1              | 19                   | 30                 | 3               | 7               | 0                | 0                 | 0               | 40        | Data from 2021.                                                                                                                                                                                                                                                                                                  | 73        |
| Losses, ethylene            | 100         | 0               | 0              | 12                   | 35                 | 1               | 0               | 0                | 0                 | 0               | 52        | Data from 2021.                                                                                                                                                                                                                                                                                                  | 73        |
| Losses, ethylene dichloride | 100         | 0               | 0              | 67                   | 0                  | 0               | 0               | 0                | 0                 | 0               | 33        | Data from 2021.                                                                                                                                                                                                                                                                                                  | 73        |
| Losses, ethylene glycol     | 100         | 0               | 5              | 64                   | 4                  | 1               | 0.5             | 0                | 0                 | 3               | 22.5      | Data from 2021.                                                                                                                                                                                                                                                                                                  | 73        |
| Losses, ethylene oxide      | 100         | 0               | 0              | 0                    | 2                  | 1.5             | 0               | 0                | 0                 | 0               | 96.5      | Data from 2021.                                                                                                                                                                                                                                                                                                  | 73        |
| Losses, formaldehyde        | 100         | 0               | 11             | 17                   | 18                 | 4               | 0               | 0                | 0                 | 3               | 47        | Data from 2021.                                                                                                                                                                                                                                                                                                  | 73        |
| Losses, methanol            | 100         | 0               | 1              | 23                   | 20                 | 2               | 5               | 0                | 0                 | 1               | 48        | Data from 2021.                                                                                                                                                                                                                                                                                                  | 73        |
| Losses, phenol              | 100         | 0               | 2.5            | 56                   | 14                 | 1               | 3               | 0                | 0                 | 1               | 22.5      | Data from 2021.                                                                                                                                                                                                                                                                                                  | 73        |
| Losses, propylene           | 100         | 0               | 0              | 9                    | 44                 | 1               | 0               | 0                | 0                 | 0               | 46        | Data from 2021.                                                                                                                                                                                                                                                                                                  | 73        |

| End-product                     | Dispose (%) | Longer life (%) | Land -fill (%) | Recycle or reuse (%) | Energy recover (%) | Incinerate (%) | Emit to air (%) | Emit to land (%) | Emit to water (%) | Waste-water (%) | Other (%) | Notes                                                                                                                                      | Ref.      |
|---------------------------------|-------------|-----------------|----------------|----------------------|--------------------|----------------|-----------------|------------------|-------------------|-----------------|-----------|--------------------------------------------------------------------------------------------------------------------------------------------|-----------|
| Losses, propylene oxide         | 100         | 0               | 0              | 0                    | 61                 | 0              | 1               | 0                | 0                 | 0               | 38        | Data from 2021.                                                                                                                            | 73        |
| Losses, sulfuric acid           | 100         | 0               | 0              | 90                   | 0                  | 0              | 0.5             | 0                | 0                 | 0               | 9.5       | Data from 2021.                                                                                                                            | 73        |
| Losses, styrene                 | 100         | 0               | 3              | 3                    | 35                 | 4              | 39              | 0                | 0                 | 0               | 16        | Data from 2021.                                                                                                                            | 73        |
| Losses, toluene                 | 100         | 0               | 0              | 70                   | 13                 | 2              | 1               | 0                | 0                 | 0               | 14        | Data from 2021.                                                                                                                            | 73        |
| Losses, xylenes                 | 100         | 0               | 0              | 42                   | 36                 | 3              | 3               | 0                | 0                 | 0               | 16        | Data from 2021.                                                                                                                            | 73        |
| Metals & mining                 | 100         | 0               | 0              | 0                    | 0                  | 0              | 0               | 0                | 0                 | 100             | 0         | Assume all mining chemicals end up in wastewater treatment.                                                                                | 74        |
| Nylon 6 & 66                    | 89          | 11              | 92             | 0                    | 8                  | 0              | 0               | 0                | 0                 | 0               | 0         | Data from 2019.                                                                                                                            | 6         |
| Other crops                     | 0.1         | 99.9            | 100            | 0                    | 0                  | 0              | 0               | 0                | 0                 | 0               | 0         | Assume most crops have long lifetimes.                                                                                                     |           |
| Other polymers                  | 94          | 6               | 82             | 7                    | 9                  | 0              | 0               | 0                | 0                 | 0               | 3         | Average from refs. for "other" (data from 2015, 2018-2019).                                                                                | 5,6,58,71 |
| Paints & surface coatings       | 10          | 90              | 73             | 27                   | 0                  | 0              | 0               | 0                | 0                 | 0               | 0         | Data from 2007.                                                                                                                            | 75,76     |
| Paper coatings & additives      | 100         | 0               | 41             | 53                   | 6                  | 0              | 0               | 0                | 0                 | 0               | 0         | Average from refs. for paper and paperboard (2018-2019).                                                                                   | 58,77     |
| PC                              | 79          | 21              | 82             | 9.5                  | 8.5                | 0              | 0               | 0                | 0                 | 0               | 0         | Data from 2019.                                                                                                                            | 6         |
| Personal care                   | 100         | 0               | 6              | 0                    | 0                  | 0              | 0               | 0                | 2.2               | 91.8            | 0         | 6% of production thrown away; assume remainder sent to wastewater and septic tanks (see cleaning agents).                                  | 72        |
| Pesticides                      | 18          | 88              | 0              | 0                    | 0                  | 0              | 0               | 96               | 0.4               | 0               | 3.6       | Data from 2015.                                                                                                                            | 78        |
| PET                             | 92          | 8               | 71             | 16                   | 13                 | 0              | 0               | 0                | 0                 | 0               | 0         | Average from refs. (2015, 2018-2019).                                                                                                      | 5,6,58,71 |
| Plastic additives               | 100         | 0               | 80             | 6                    | 13                 | 0              | 0               | 0                | 0                 | 0               | 1         | Average from refs. for total of all plastic types (data from 2015, 2018-2019).                                                             | 5,6,58,71 |
| PP                              | 94          | 6               | 86             | 1                    | 12                 | 0              | 0               | 0                | 0                 | 0               | 1         | Average from refs. (2015, 2018-2019).                                                                                                      | 5,6,58,71 |
| PS                              | 84          | 16              | 83             | 2                    | 15                 | 0              | 0               | 0                | 0                 | 0               | 0         | Average from refs. (2015, 2018-2019).                                                                                                      | 5,6,58,71 |
| Pulp & paper treatment          | 100         | 0               | 0              | 0                    | 0                  | 0              | 0               | 0                | 0                 | 100             | 0         | Assume all is sent to wastewater.                                                                                                          | N/A       |
| PUR                             | 71          | 29              | 78.5           | 9                    | 8.5                | 0              | 0               | 0                | 0                 | 0               | 0         | Average from refs. (2016 and 2019).                                                                                                        | 6,8       |
| PVC                             | 39          | 61              | 85             | 1                    | 13                 | 0              | 0               | 0                | 0                 | 0               | 1         | Average from refs. (2015, 2018-2019).                                                                                                      | 5,6,58,71 |
| Refrigerants & air conditioning | 8           | 92              | 79             | 21                   | 0                  | 0              | 0               | 0                | 0                 | 0               | 0         | A/C units have 12.5-year lifetime. Assume recycled or landfilled according to ref. (2021).                                                 | 79        |
| Rubbers                         | 87          | 13              | 45             | 24                   | 31                 | 0              | 0               | 0                | 0                 | 0               | 0         | Average from refs. (2018-2019).                                                                                                            | 6,58      |
| Solvent                         | 100         | 0               | 0.4            | 39                   | 19                 | 2.3            | 4.2             | 0                | 0                 | 0.3             | 35        | Data for butanol, methanol, n-methylpyrrolidone, and methyl isobutyl ketone, as well as an estimated average for non-TRI chemicals (2021). | 73        |
| Superabsorbent polymers         | 100         | 0               | 80             | 0                    | 20                 | 0              | 0               | 0                | 0                 | 0               | 0         | Data for diapers only (2018).                                                                                                              | 80        |
| Textiles processing             | 100         | 0               | 0              | 0                    | 0                  | 0              | 0               | 0                | 0                 | 100             | 0         | Assume all is sent to wastewater.                                                                                                          | N/A       |
| Water treatment                 | 100         | 0               | 36             | 0                    | 0                  | 0              | 0               | 0                | 0                 | 64              | 0         | Assume the polymers and aluminas are used as coagulants and landfilled. Other components in wastewater.                                    | N/A       |
| Wood laminates                  | 5           | 95              | 100            | 0                    | 0                  | 0              | 0               | 0                | 0                 | 0               | 0         | Assume 20-year lifetime, then landfill.                                                                                                    | N/A       |

**Table S3.** Chemical reactions for the chemical intermediates included in this study (continues to page S17).

| Target chemical                     | Target category     | Starting chemical       | Chemical reaction                                                                                                |
|-------------------------------------|---------------------|-------------------------|------------------------------------------------------------------------------------------------------------------|
| Polyethylene                        | End-product         | Ethylene                | $C_2H_4 \rightarrow (C_2H_4)_n$                                                                                  |
| Ethylene oxide <sup>a</sup>         | Tier 1 intermediate | Ethylene                | $2C_2H_4 + O_2 \rightarrow 2C_2H_4O$                                                                             |
| Ethylene dichloride                 | Tier 1 intermediate | Ethylene                | $C_2H_4 + Cl_2 \rightarrow C_2H_4Cl_2$                                                                           |
| Ethylbenzene                        | Tier 1 intermediate | Ethylene                | $C_2H_4 + C_6H_6 \rightarrow C_8H_{10}$                                                                          |
| Vinyl acetate                       | Tier 1 intermediate | Ethylene                | $2C_2H_4 + 2C_2H_4O_2 + O_2 \rightarrow 2C_4H_6O_2 + 2H_2O$                                                      |
| Acetaldehyde                        | Tier 1 intermediate | Ethylene                | $C_2H_4 + H_2O \rightarrow C_2H_4O$                                                                              |
| Ethylene glycol                     | Tier 2 intermediate | Ethylene oxide          | $C_2H_4O + H_2O \rightarrow C_2H_6O_2$                                                                           |
| Ethanolamines                       | Tier 2 intermediate | Ethylene oxide          | $C_2H_4O + NH_3 \rightarrow C_2H_7NO$                                                                            |
| E-series glycol ethers              | Tier 2 intermediate | Ethylene oxide          | $C_2H_4O + C_4H_{10}O \rightarrow C_6H_{14}O_2$                                                                  |
| Polyethylene glycol                 | Tier 2 intermediate | Ethylene oxide          | $C_2H_4O + C_2H_6O_2 \rightarrow (C_2H_4O)_n + 2H_2O$                                                            |
| Vinyl chloride                      | Tier 2 intermediate | Ethylene dichloride     | $C_2H_4Cl_2 \rightarrow C_2H_3Cl + HCl$                                                                          |
| Trichloroethylene                   | Tier 2 intermediate | Ethylene dichloride     | $C_2H_4Cl_2 + 2Cl_2 \rightarrow C_2HCl_3 + 3HCl$                                                                 |
| Styrene                             | Tier 2 intermediate | Ethylbenzene            | $C_8H_{10} \rightarrow C_8H_8 + H_2$                                                                             |
| Polyvinyl acetate                   | Tier 2 intermediate | Vinyl acetate           | $C_4H_6O_2 \rightarrow (C_4H_6O_2)_n$                                                                            |
| Polyvinyl alcohol                   | Tier 2 intermediate | Vinyl acetate           | $C_4H_6O_2 + 2CH_4O \rightarrow 3C_2H_4O + H_2O$                                                                 |
| Ethylene vinyl acetate <sup>b</sup> | Tier 2 intermediate | Vinyl acetate           | $C_4H_6O_2 + 18C_2H_4 \rightarrow (C_2H_4)_{18}(C_4H_6O_2)$                                                      |
| Ethylene vinyl alcohol <sup>c</sup> | Tier 2 intermediate | Vinyl acetate           | $C_4H_6O_2 + C_2H_4 \rightarrow (C_2H_4O-C_2H_4)_n$                                                              |
| Polyethylene terephthalate          | End-product         | Ethylene glycol         | $C_2H_6O_2 + C_8H_6O_4 \rightarrow C_{10}H_8O_4 + 2H_2O$                                                         |
| Polyurethanes                       | End-product         | Ethylene glycol         | $C_{15}H_{10}N_2O_2 + C_9H_6N_2O_2 + C_2H_6O_2 + CH_{10}O_2 + 2H_2O \rightarrow (C_{27}H_{36}N_2O_{10})_n + N_2$ |
| Ethyleneamines                      | Tier 3 intermediate | Ethanolamines           | $C_2H_7NO + NH_3 \rightarrow C_2H_8N_2 + H_2O$                                                                   |
| Polyvinyl chloride                  | End-product         | Vinyl chloride          | $C_2H_3Cl \rightarrow (C_2H_3Cl)_n$                                                                              |
| HFC-125                             | Tier 3 intermediate | Trichloroethylene       | $C_2HCl_3 + 5HF \rightarrow C_2HF_5 + 3HCl + H_2$                                                                |
| HFC-134a                            | Tier 3 intermediate | Trichloroethylene       | $C_2HCl_3 + 4HF \rightarrow C_2H_2F_4 + 3HCl$                                                                    |
| Polystyrene                         | Tier 3 intermediate | Styrene                 | $C_8H_8 \rightarrow (C_8H_8)_n$                                                                                  |
| Acrylonitrile butadiene styrene     | End-product         | Styrene                 | $C_8H_8 + C_3H_3N + C_4H_6 \rightarrow (C_{15}H_{17}N)_n$                                                        |
| Styrene-butadiene rubber            | End-product         | Styrene                 | $C_8H_8 + C_4H_6 \rightarrow (C_{12}H_{14})_n$                                                                   |
| Polyvinyl butyral                   | End-product         | Polyvinyl alcohol       | $2C_2H_4O + C_4H_6O \rightarrow (C_8H_{14}O_2)_n + H_2O$                                                         |
| Polypropylene                       | End-product         | Propylene               | $C_3H_6 \rightarrow (C_3H_6)_n$                                                                                  |
| Propylene oxide                     | Tier 1 intermediate | Propylene               | $C_3H_6 + NaOH + HOCl \rightarrow C_3H_6O + NaCl + H_2O$                                                         |
| Acrylonitrile                       | Tier 1 intermediate | Propylene               | $C_3H_6 + NH_3 + 1.5O_2 \rightarrow C_3H_3N + 3H_2O$                                                             |
| Cumene                              | Tier 1 intermediate | Propylene               | $C_3H_6 + C_6H_6 \rightarrow C_9H_{12}$                                                                          |
| Acrylic acid                        | Tier 1 intermediate | Propylene               | $2C_3H_6 + 3O_2 \rightarrow 2C_3H_4O_2 + 2H_2O$                                                                  |
| 2-ethylhexanol                      | Tier 1 intermediate | Propylene               | $2C_3H_6 + 3CO + 6H_2 \rightarrow C_8H_{18}O + CO_2$                                                             |
| Isopropanol                         | Tier 1 intermediate | Propylene               | $C_3H_6 + H_2O \rightarrow C_3H_8O$                                                                              |
| Butanol                             | Tier 1 intermediate | Propylene               | $C_3H_6 + CO + 2H_2 \rightarrow C_4H_{10}O$                                                                      |
| Epichlorohydrin                     | Tier 1 intermediate | Propylene               | $C_3H_6 + 2Cl_2 + NaOH \rightarrow C_3H_5ClO + NaCl + 2HCl$                                                      |
| Propylene glycol                    | Tier 2 intermediate | Propylene oxide         | $C_3H_6O + H_2O \rightarrow C_3H_8O_2$                                                                           |
| Butanediol                          | Tier 2 intermediate | Propylene oxide         | $C_2H_2 + 2CH_2O + 2H_2 \rightarrow C_4H_{10}O_2$                                                                |
| P-series glycol ethers              | Tier 2 intermediate | Propylene oxide         | $C_3H_6O + CH_4O \rightarrow C_4H_{10}O_2$                                                                       |
| Acrylamide                          | Tier 2 intermediate | Acrylonitrile           | $C_3H_3N + H_2O \rightarrow C_3H_5NO$                                                                            |
| Adiponitrile                        | Tier 2 intermediate | Acrylonitrile           | $2C_3H_3N \rightarrow C_6H_8N_2$                                                                                 |
| Nitrile rubber <sup>d</sup>         | Tier 2 intermediate | Acrylonitrile           | $C_3H_3N + C_4H_6 \rightarrow (C_3H_3N)(C_4H_6)$                                                                 |
| Carbon fiber                        | Tier 2 intermediate | Acrylonitrile           | $C_3H_3N + O_2 \rightarrow 2C + CO_2 + NH_3$                                                                     |
| Phenol                              | Tier 2 intermediate | Cumene                  | $C_9H_{12} + O_2 \rightarrow C_6H_6O + C_3H_6O$                                                                  |
| Acetone                             | Tier 2 intermediate | Cumene                  | $C_9H_{12} + O_2 \rightarrow C_6H_6O + C_3H_6O$                                                                  |
| Acrylate esters                     | Tier 2 intermediate | Acrylic acid            | $C_3H_4O_2 + C_4H_{10}O \rightarrow C_7H_{12}O_2 + H_2O$                                                         |
| Superabsorbent polymers             | End-product         | Acrylic acid            | $C_3H_4O_2 \rightarrow (C_3H_4O_2)_n$                                                                            |
| Methyl isobutyl ketone              | Tier 2 intermediate | Isopropanol             | $2C_3H_6O \rightarrow C_6H_{12}O$                                                                                |
| n-butyl acetate                     | Tier 2 intermediate | Butanol                 | $C_4H_{10}O + C_2H_4O_2 \rightarrow C_6H_{12}O_2 + H_2O$                                                         |
| Butylamines                         | Tier 2 intermediate | Butanol                 | $C_4H_{10}O + NH_3 \rightarrow C_4H_{11}N + H_2O$                                                                |
| Tetrahydrofuran                     | Tier 3 intermediate | Butanediol              | $C_4H_{10}O_2 \rightarrow C_4H_8O + H_2O$                                                                        |
| Gamma-butyrolactone                 | Tier 3 intermediate | Butanediol              | $C_4H_{10}O_2 \rightarrow C_4H_6O_2 + 2H_2$                                                                      |
| Polybutylene terephthalate          | End-product         | Butanediol              | $C_4H_{10}O_2 + C_8H_6O_4 \rightarrow (C_{12}H_{12}O_4)_n$                                                       |
| Polyacrylamide                      | Tier 3 intermediate | Acrylamide              | $C_3H_5NO \rightarrow (C_3H_5NO)_n$                                                                              |
| Hexamethylene diamine               | Tier 3 intermediate | Acrylamide              | $C_6H_8N_2 + 4H_2 \rightarrow C_6H_{16}N_2$                                                                      |
| Bisphenol A                         | Tier 3 intermediate | Phenol                  | $2C_6H_6O + C_3H_6O \rightarrow C_{15}H_{16}O_2$                                                                 |
| Methyl methacrylate                 | Tier 3 intermediate | Acetone                 | $C_3H_6O + CH_4O + HCN + H_2SO_4 \rightarrow C_5H_8O_2 + NH_4HSO_4$                                              |
| N-methyl-2-pyrrolidone              | Tier 4 intermediate | Gamma-butyrolactone     | $C_4H_6O_2 + CH_3N \rightarrow C_5H_9NO + H_2O$                                                                  |
| Polycarbonate                       | End-product         | Bisphenol A             | $C_{15}H_{16}O_2 + COCl_2 + 2NaOH \rightarrow (C_{16}H_{14}O_3)_n + 2NaCl + 2H_2O$                               |
| Polymethyl methacrylate             | End-product         | Methyl methacrylate     | $C_5O_2H_8 \rightarrow (C_5O_2H_8)_n$                                                                            |
| Methyl tert-butyl ether             | Tier 1 intermediate | Butylenes               | $CH_4O + C_4H_8 \rightarrow C_5H_{12}O$                                                                          |
| Ethyl tert-butyl ether              | Tier 1 intermediate | Butylenes               | $C_2H_6O + C_4H_8 \rightarrow C_6H_{14}O$                                                                        |
| Polyisobutylene                     | End-product         | Methyl tert-butyl ether | $C_5H_{12}O \rightarrow C_4H_8 + CH_4O$                                                                          |
| Polybutadiene                       | End-product         | Butadiene               | $C_4H_6 \rightarrow (C_4H_6)_n$                                                                                  |



| Target chemical                 | Target category     | Starting chemical          | Chemical reaction                                                                                    |
|---------------------------------|---------------------|----------------------------|------------------------------------------------------------------------------------------------------|
| Nitrobenzene                    | Tier 1 intermediate | Benzene                    | $C_6H_6 + HNO_3 \rightarrow C_6H_5NO_2 + H_2O$                                                       |
| Cyclohexanol / cyclohexanone    | Tier 1 intermediate | Benzene                    | $2C_6H_6 + 5H_2 + O_2 \rightarrow C_6H_{12}O + C_6H_{10}O$                                           |
| Alkylbenzene                    | Tier 1 intermediate | Benzene                    | $C_6H_6 + C_6H_{12} \rightarrow C_{12}H_{18}$                                                        |
| Aniline                         | Tier 2 intermediate | Nitrobenzene               | $C_6H_5NO_2 + H_2 \rightarrow C_6H_7N + O_2$                                                         |
| Adipic acid                     | Tier 2 intermediate | Cyclohexanol/cyclohexanone | $(C_6H_{12}O + C_6H_{10}O) + HNO_3 \rightarrow 2C_6H_{10}O_4$                                        |
| Caprolactam                     | Tier 2 intermediate | Cyclohexanol/cyclohexanone | $(C_6H_{12}O + C_6H_{10}O) + NH_3 \rightarrow 2C_6H_{11}NO + 1.5H_2$                                 |
| Methylene diphenyl diisocyanate | Tier 3 intermediate | Aniline                    | $2C_6H_7N + CH_2O + 2COCl_2 \rightarrow C_{15}H_{10}N_2O_2 + 4HCl + H_2O$                            |
| Nylon 6                         | End-product         | Caprolactam                | $C_6H_{11}NO \rightarrow (C_6H_{11}NO)_n$                                                            |
| Nylon 66                        | End-product         | Hexamethylenediamine       | $C_6H_{12}N_2 + C_6H_{10}O_4 \rightarrow (C_{12}H_{22}N_2O_2)_n + H_2O$                              |
| Toluene diisocyanate            | Tier 1 intermediate | Toluene                    | $C_7H_8 + 2HNO_3 + 2COCl_2 + 6H_2 \rightarrow C_9H_6N_2O_2 + 6H_2O + 4HCl$                           |
| Benzoic acid                    | Tier 1 intermediate | Toluene                    | $C_7H_8 + 1.5O_2 \rightarrow C_7H_6O_2 + H_2O$                                                       |
| Sodium / potassium benzoate     | Tier 2 intermediate | Benzoic acid               | $C_7H_6O_2 + NaOH \rightarrow C_7H_5NaO_2 + H_2O$                                                    |
| Isophthalic acid                | Tier 1 intermediate | Meta-xylene                | $C_8H_{10} + 3O_2 \rightarrow C_8H_6O_4 + 2H_2O$                                                     |
| Terephthalic acid               | Tier 1 intermediate | Para-xylene                | $C_8H_{10} + 3O_2 \rightarrow C_8H_6O_4 + 2H_2O$                                                     |
| Dimethyl terephthalate          | Tier 1 intermediate | Para-xylene                | $C_8H_{10} + 3O_2 + 2CH_4O \rightarrow C_{10}H_{10}O_4 + 4H_2O$                                      |
| Phthalic anhydride              | Tier 1 intermediate | Ortho-xylene               | $C_8H_{10} + 3O_2 \rightarrow C_8H_4O_3 + 3H_2O$                                                     |
| Formaldehyde                    | Tier 1 intermediate | Methanol                   | $CH_4O \rightarrow CH_2O + H_2$                                                                      |
| Acetic acid                     | Tier 1 intermediate | Methanol                   | $CH_4O + CO \rightarrow C_2H_4O_2$                                                                   |
| Methylamines                    | Tier 1 intermediate | Methanol                   | $CH_4O + NH_3 \rightarrow CH_5N + H_2O$                                                              |
| Methyl chloride                 | Tier 1 intermediate | Methanol                   | $CH_4O + HCl \rightarrow CH_3Cl + H_2O$                                                              |
| Polyacetal resins               | End-product         | Formaldehyde               | $CH_2O \rightarrow (CH_2O)_n$                                                                        |
| Pentaerythritol                 | Tier 2 intermediate | Formaldehyde               | $3CH_2O + C_2H_4O + H_2 \rightarrow C_5H_{12}O_4$                                                    |
| Acetic anhydride                | Tier 2 intermediate | Acetic acid                | $2C_2H_4O_2 \rightarrow C_4H_6O_3 + H_2O$                                                            |
| Methylene chloride              | Tier 2 intermediate | Methyl chloride            | $CH_3Cl + Cl_2 \rightarrow CH_2Cl_2 + HCl$                                                           |
| Methyl chlorosilanes            | Tier 2 intermediate | Methyl chloride            | $2CH_3Cl + Si \rightarrow C_2H_6Cl_2Si$                                                              |
| Cellulose acetates              | Tier 3 intermediate | Acetic anhydride           | $4C_4H_6O_3 + 4(C_6H_{10}O_5)_n + H_2O \rightarrow C_{20}H_{38}O_{11}$                               |
| Chloroform                      | Tier 3 intermediate | Methylene chloride         | $CH_2Cl_2 + Cl_2 \rightarrow CHCl_3 + HCl$                                                           |
| HFC-32                          | Tier 3 intermediate | Methylene chloride         | $CH_2Cl_2 + 2HF \rightarrow CH_2F_2 + 2HCl$                                                          |
| Silicones                       | Tier 3 intermediate | Methyl chlorosilanes       | $C_2H_6Cl_2Si + H_2O \rightarrow (CH_3)_2OSi)_n + 2HCl$                                              |
| Carbon tetrachloride            | Tier 4 intermediate | Chloroform                 | $CHCl_3 + Cl_2 \rightarrow CCl_4 + HCl$                                                              |
| HCFC-22                         | Tier 4 intermediate | Chloroform                 | $CHCl_3 + 2HF \rightarrow CHClF_2 + 2HCl$                                                            |
| Urea                            | Tier 1 intermediate | Ammonia                    | $2NH_3 + CO_2 \rightarrow COH_4N_2 + H_2O$                                                           |
| Nitric acid                     | Tier 1 intermediate | Ammonia                    | $NH_3 + 2O_2 \rightarrow HNO_3 + H_2O$                                                               |
| Ammonium phosphate              | Tier 1 intermediate | Ammonia                    | $NH_3 + H_3PO_4 \rightarrow NH_4H_2PO_4$                                                             |
| Ammonium sulfate                | Tier 1 intermediate | Ammonia                    | $2NH_3 + H_2SO_4 \rightarrow (NH_4)_2SO_4$                                                           |
| Hydrogen cyanide                | Tier 1 intermediate | Ammonia                    | $2NH_3 + 2CH_4 + 3O_2 \rightarrow 2HCN + 6H_2O$                                                      |
| Melamine                        | Tier 2 intermediate | Urea                       | $6COH_4N_2 \rightarrow C_3H_6N_6 + 6NH_3 + 3CO_2$                                                    |
| Ammonium nitrate                | Tier 2 intermediate | Nitric acid                | $HNO_3 + NH_3 \rightarrow NH_4NO_3$                                                                  |
| Sodium cyanide                  | Tier 2 intermediate | Hydrogen cyanide           | $HCN + NaOH \rightarrow NaCN + H_2O$                                                                 |
| Phosgene                        | Tier 1 intermediate | Chlorine                   | $CO + Cl_2 \rightarrow COCl_2$                                                                       |
| Aluminum chloride               | Tier 1 intermediate | Chlorine                   | $3Cl_2 + Al_2O_3 \rightarrow 2AlCl_3 + 1.5O_2$                                                       |
| Sodium hypochlorite             | Tier 1 intermediate | Chlorine                   | $Cl_2 + 2NaOH \rightarrow NaOCl + NaCl + H_2O$                                                       |
| Calcium hypochlorite            | Tier 1 intermediate | Chlorine                   | $2Cl_2 + 2NaOH + Ca(OH)_2 \rightarrow Ca(OCl)_2 + 2NaCl + 2H_2O$                                     |
| Titanium dioxide                | Tier 1 intermediate | Chlorine                   | $2Cl_2 + TiO_2 \rightarrow TiO_2 + 2Cl_2$                                                            |
| Aluminum oxide                  | Tier 1 intermediate | Sodium hydroxide           | $NaOH + Al_2O_3 \rightarrow Al_2O_3 + NaOH$                                                          |
| Sodium hydrosulfide             | Tier 1 intermediate | Sodium hydroxide           | $NaOH + H_2S \rightarrow NaSH + H_2O$                                                                |
| Sodium hydrosulfite             | Tier 1 intermediate | Sodium hydroxide           | $2NaOH + 2SO_2 \rightarrow Na_2S_2O_4 + O_2$                                                         |
| Sodium sulfide                  | Tier 1 intermediate | Sodium hydroxide           | $2NaOH + 2SO_2 \rightarrow Na_2S_2O_4 + O_2$                                                         |
| Sodium sulfite                  | Tier 1 intermediate | Sodium hydroxide           | $2NaOH + 2SO_2 + Na_2CO_3 \rightarrow 2Na_2SO_3 + CO_2 + H_2O$                                       |
| Sodium thiosulfate              | Tier 1 intermediate | Sodium hydroxide           | $2NaOH + 2SO_2 \rightarrow Na_2S_2O_3 + H_2O + O_2$                                                  |
| Aluminum metal                  | Tier 2 intermediate | Aluminum oxide             | $2Al_2O_3 + 3C \rightarrow 4Al + 3CO_2$                                                              |
| Aluminum sulfate                | Tier 2 intermediate | Aluminum oxide             | $Al_2O_3 + 3H_2SO_4 \rightarrow Al_2(SO_4)_3 + 3H_2O$                                                |
| Sodium aluminate                | Tier 2 intermediate | Aluminum oxide             | $Al_2O_3 + 2NaOH \rightarrow 2NaAlO_2 + H_2O$                                                        |
| Phosphoric acid                 | Tier 1 intermediate | Sulfuric acid              | $3H_2SO_4 + Ca_3(PO_4)_2 \rightarrow 2H_3PO_4 + 3CaSO_4$                                             |
| Hydrofluoric acid               | Tier 1 intermediate | Sulfuric acid              | $H_2SO_4 + CaF_2 \rightarrow 2HF + CaSO_4$                                                           |
| Glass <sup>e</sup>              | End-product         | Sodium carbonate           | $0.15Na_2CO_3 + 0.75SiO_2 + 0.10CaO \rightarrow (Na_2O)_{0.15}(SiO_2)_{0.75}(CaO)_{0.10} + 0.15CO_2$ |
| Sodium silicate                 | Tier 1 intermediate | Sodium carbonate           | $Na_2CO_3 + SiO_2 \rightarrow Na_2SiO_3 + CO_2$                                                      |
| Sodium bicarbonate              | Tier 1 intermediate | Sodium carbonate           | $Na_2CO_3 + CO_2 + H_2O \rightarrow SiO_2 + Na_2SO_4 + H_2O$                                         |
| Silicas                         | Tier 2 intermediate | Sodium silicate            | $Na_2SiO_3 + H_2SO_4 \rightarrow SiO_2 + Na_2SO_4 + H_2O$                                            |

<sup>a</sup> Side reaction of:  $C_2H_4 + 3O_2 \rightarrow 2CO_2 + 2H_2O$

<sup>b</sup> EVA is typically 15wt% vinyl acetate

<sup>c</sup> EVOH is typically 25-50 mol% ethylene.

<sup>d</sup> Acrylonitrile content varies from 16-53%. 50% assumed here.

<sup>e</sup> Ratio of sodium carbonate, silica, and lime based on ref. <sup>81</sup>

**Table S4.** Greenhouse gas (GHG) emission factors for the studied chemical classes, where the low and high values are the minimum and maximum of the range of factors sourced from ecoinvent 3.9.1 (with ReCiPe H midpoint method), Carbon Minds, and the Material Flows through Industry tool, in kilogram of carbon dioxide equivalent per kilogram of chemical. Quantity of the chemical class that is wasted each year in the United States (landfill, wastewater treatment, or emission to air, water, or land), in million metric tons (Mt). Total GHG emissions associated with the production of each chemical class for applications that end up being wasted, in Mt carbon dioxide equivalent.

| <b>Chemical</b>  | <b>GHG emissions, low (kg CO<sub>2</sub> eq./kg)</b> | <b>GHG emissions, high (kg CO<sub>2</sub> eq./kg)</b> | <b>Quantity wasted (Mt)</b> | <b>Wasted GHG emissions, low (Mt CO<sub>2</sub> eq.)</b> | <b>Wasted GHG emissions, high (Mt CO<sub>2</sub> eq.)</b> |
|------------------|------------------------------------------------------|-------------------------------------------------------|-----------------------------|----------------------------------------------------------|-----------------------------------------------------------|
| Ethylene         | 0.80                                                 | 1.93                                                  | 15.1                        | 12.1                                                     | 29.1                                                      |
| Propylene        | 0.95                                                 | 1.56                                                  | 6.89                        | 6.55                                                     | 10.8                                                      |
| Butylenes        | 1.70                                                 | 2.39                                                  | 0.14                        | 0.24                                                     | 0.33                                                      |
| Benzene          | 1.23                                                 | 2.01                                                  | 2.45                        | 3.01                                                     | 4.91                                                      |
| Xylenes          | 1.11                                                 | 1.84                                                  | 2.11                        | 2.34                                                     | 3.88                                                      |
| Toluene          | 1.00                                                 | 1.69                                                  | 0.15                        | 0.15                                                     | 0.25                                                      |
| Butadiene        | 1.23                                                 | 2.37                                                  | 0.18                        | 0.22                                                     | 0.43                                                      |
| Ethanol          | 1.44                                                 | 3.02                                                  | 0.31                        | 0.45                                                     | 0.94                                                      |
| Methanol         | 0.43                                                 | 0.93                                                  | 1.28                        | 0.55                                                     | 1.19                                                      |
| Sulfuric acid    | 0.13                                                 | 0.19                                                  | 4.93                        | 0.63                                                     | 0.93                                                      |
| Ammonia          | 0.51                                                 | 3.40                                                  | 8.59                        | 4.38                                                     | 29.2                                                      |
| Sodium hydroxide | 1.18                                                 | 2.72                                                  | 4.50                        | 5.31                                                     | 12.3                                                      |
| Sodium carbonate | 0.47                                                 | 1.33                                                  | 2.32                        | 1.10                                                     | 3.07                                                      |
| Chlorine         | 1.10                                                 | 2.23                                                  | 2.95                        | 3.23                                                     | 6.58                                                      |

**Table S5.** Chemicals that are wasted (landfill, wastewater treatment, or emission to air, water, or land) and are listed in the EPA Toxics Release Inventory, as well as their parent chemical and end-product application(s). Human toxicity (carcinogenic and non-carcinogenic) factors for each chemical as calculated from ecoinvent 3.9.1 data and the ReCiPe H endpoint method, in disability adjusted life years (DALYs) per kilogram of chemical. Quantity of each chemical disposed, in million metric tons (Mt), and the total toxicity associated with this waste, in DALYs.

| Chemical               | Parent chemical | Product type                                                                                    | Proxy chemical             | Human toxicity (DALYs / kg) | Quantity disposed (Mt) | Total human toxicity (DALYs) |
|------------------------|-----------------|-------------------------------------------------------------------------------------------------|----------------------------|-----------------------------|------------------------|------------------------------|
| Acetic anhydride       | Methanol        | Health care                                                                                     | N/A                        | 1.35E-6                     | 0.020                  | 26.9                         |
| Acrylate esters        | Propylene       | Paper/plastic additives, functional fluids, paint                                               | Butyl acetate              | 1.55E-6                     | 0.079                  | 122                          |
| Acrylic acid           | Propylene       | Paper/plastic additives, cleaning agents, water treatment                                       | N/A                        | 4.63E-7                     | 0.077                  | 35.4                         |
| Acetaldehyde           | Ethylene        | Personal care                                                                                   | N/A                        | 5.37E-7                     | 0.010                  | 5.4                          |
| Ammonia                | Ammonia         | Crops and food, mining                                                                          | N/A                        | 6.83E-7                     | 1.32                   | 899                          |
| Carbon tetrachloride   | Methanol        | Functional fluids                                                                               | N/A                        | 3.85E-7                     | 0.003                  | 1.1                          |
| Chlorine               | Chlorine        | Pulp and paper, water treatment                                                                 | N/A                        | 4.59E-7                     | 0.68                   | 312                          |
| Epichlorohydrin        | Propylene       | Paints, functional fluids                                                                       | N/A                        | 1.19E-6                     | 0.012                  | 14.2                         |
| Ethanolamine           | Ethylene        | Mining, cleaning agents, wood laminates, other industrial                                       | N/A                        | 9.22E-7                     | 0.19                   | 173                          |
| Ethoxylates            | Ethylene        | Cleaning agents                                                                                 | Ethoxylated alcohol (AE11) | 7.92E-7                     | 0.58                   | 459                          |
| Ethylene glycol        | Ethylene        | Functional fluids                                                                               | N/A                        | 7.00E-7                     | 0.74                   | 518                          |
| Formaldehyde           | Methanol        | Wood laminates                                                                                  | N/A                        | 4.05E-7                     | 0.04                   | 16.0                         |
| HFC-32                 | Methanol        | Functional fluids                                                                               | Trifluoro-methane          | 6.48E-6                     | 0.004                  | 30.5                         |
| Hydrofluoric acid      | Sulfuric acid   | Functional fluids, mining                                                                       | N/A                        | 3.66E-6                     | 0.024                  | 87.8                         |
| Isopropanol            | Propylene       | Solvents, health care                                                                           | N/A                        | 7.03E-7                     | 0.18                   | 129                          |
| Methanol               | Methanol        | Solvents                                                                                        | N/A                        | 1.69E-7                     | 0.036                  | 6.1                          |
| Methyl isobutyl ketone | Propylene       | Paper/plastic additives, functional fluids, paints                                              | N/A                        | 1.09E-6                     | 0.009                  | 10.0                         |
| Methyl methacrylate    | Propylene       | Paints                                                                                          | N/A                        | 5.33E-7                     | 0.014                  | 7.4                          |
| Methylamine            | Methanol        | Pulp and paper, water treatment, cleaning agents, other industrial use                          | N/A                        | 9.02E-7                     | 0.12                   | 106                          |
| Methylene chloride     | Methanol        | Health care, paints                                                                             | N/A                        | 5.34E-7                     | 0.021                  | 11.1                         |
| N-methyl-2-pyrrolidone | Propylene       | Paints, solvents                                                                                | N/A                        | 2.33E-6                     | 0.007                  | 15.7                         |
| Nitric acid            | Ammonia         | Mining                                                                                          | N/A                        | 3.79E-7                     | 0.040                  | 15.2                         |
| Phenol                 | Propylene       | Wood laminates                                                                                  | N/A                        | 8.61E-7                     | 0.034                  | 28.9                         |
| Phthalic anhydride     | Xylenes         | Paints,                                                                                         | N/A                        | 5.22E-7                     | 0.002                  | 1.1                          |
| Silicones              | Methanol        | Paper/plastic additives, cleaning agents, functional fluids, health care, paints, personal care | N/A                        | 9.81E-7                     | 0.099                  | 96.7                         |
| Sodium cyanide         | Ammonia         | Mining                                                                                          | N/A                        | 1.28E-6                     | 0.050                  | 64.2                         |
| Sulfuric acid          | Sulfuric acid   | Mining, pulp and paper                                                                          | N/A                        | 1.14E-6                     | 2.61                   | 2980                         |
| Toluene                | Toluene         | Solvents                                                                                        | N/A                        | 9.09E-8                     | 0.034                  | 3.1                          |

**Table S6.** Assumptions for the circularity targets and optimistic circularity scenarios.

| Product             | Relevant chemical class(es)              | Circular economy strategy | Measure for circularity targets (M1) | Measure for optimistic circularity (M2) | Justification                                                                                                                                                                               | Ref.     |
|---------------------|------------------------------------------|---------------------------|--------------------------------------|-----------------------------------------|---------------------------------------------------------------------------------------------------------------------------------------------------------------------------------------------|----------|
| Antifreeze          | Ethylene                                 | Recycle                   | N/A                                  | 80%                                     | M2 assumes the same recycling rate for paint is applicable to antifreeze.                                                                                                                   |          |
| Food                | Ammonia, sulfuric acid                   | Reduce, Recycle           | 15% food wasted                      | 10% food wasted, 76% of waste recycled  | M1 based on EPA's food waste reduction target. M2 assumes food waste can be further reduced and that overall composting rate can meet that of the food manufacturing and processing sector. | 70,82    |
| Glass               | Sodium carbonate                         | Recycle                   | 50%                                  | 66%                                     | M1 based on EPA's recycling target. M2 assumes only container and other glass can be recycled with a maximum sorting/recycling yield of 98%.                                                | 83,84    |
| HDPE                | Ethylene                                 | Recycle                   | 50%                                  | 88%                                     | M1 based on EPA's recycling target. M2 based on maximum sorting yield (95%) and mechanical recycling (93%) yield.                                                                           | 83,85    |
| LDPE/ LLDPE         | Ethylene                                 | Recycle                   | 50%                                  | 90%                                     | M1 based on EPA's recycling target. M2 based on maximum sorting yield (95%) and mechanical recycling yield (95%).                                                                           | 83,85    |
| Nylon 6/66          | Propylene, benzene                       | Recycle                   | 50%                                  | 90%                                     | M1 based on EPA's recycling target. M2 based on maximum sorting yield (95%) and chemical recycling yield (95%)                                                                              | 83,86    |
| Other polymers      |                                          | Recycle                   | 50%                                  | 50%                                     | M1 based on EPA's 50% recycling target. M2 assumes no further improvement is possible.                                                                                                      | 83       |
| Paints and coatings | Ethylene, propylene, methanol, chlorine  | Recycle                   | N/A                                  | 80%                                     | M2 assumes that 20% of paint is unrecyclable.                                                                                                                                               | 87       |
| PC                  | Propylene, chlorine                      | Recycle                   | 50%                                  | 50%                                     | M1 based on EPA's 50% recycling target. M2 assumes no further improvement is possible.                                                                                                      | 83       |
| PET                 | Ethylene, xylenes                        | Recycle                   | 50%                                  | 95%                                     | M1 based on EPA's recycling target. M2 based on maximum sorting yield (95%) and mechanical recycling yield (90%), with remainder sent to chemical recycling (95% yield).                    | 83,85    |
| PP                  | Propylene                                | Recycle                   | 50%                                  | 90%                                     | M1 based on EPA's recycling target. M2 based on maximum sorting yield (95%) and mechanical recycling yield (95%).                                                                           | 83,85    |
| PUR                 | Ethylene, benzene                        | Recycle                   | 50%                                  | 68%                                     | M1 based on EPA's recycling target. M2 assumes that recycling is only applicable to rigid/flexible foams and elastomers (75% of total PUR) with a 90% glycolysis yield.                     | 83,88,89 |
| PVC                 | Ethylene, chlorine                       | Recycle                   | 50%                                  | 50%                                     | M1 based on EPA's 50% recycling target. M2 assumes no further improvement is possible.                                                                                                      | 83       |
| Rubbers             | Ethylene, butylenes, butadiene, methanol | Recycle                   | 50%                                  | 75%                                     | M1 based on EPA's recycling target. M2 assumes a moderate increase in recycling is attainable.                                                                                              | 83       |
| Solvents            | Propylene, toluene, ethanol, methanol,   | Recycle                   | N/A                                  | 85%                                     | M2 assumes that the maximum recycling rate reported for a solvent (N-methylpyrrolidone) in the TRI can be applied to all solvents.                                                          | 73       |

**Table S7.** Disposal of end-of-life chemicals by chemical class and end-product category, in million metric tons (Mt).

| End-product                             | Chemical class (Mt) |           |           |         |         |         |           |         |          |               |         |                  |                  |          | Total |
|-----------------------------------------|---------------------|-----------|-----------|---------|---------|---------|-----------|---------|----------|---------------|---------|------------------|------------------|----------|-------|
|                                         | Ethylene            | Propylene | Butylenes | Benzene | Xylenes | Toluene | Butadiene | Ethanol | Methanol | Sulfuric acid | Ammonia | Sodium hydroxide | Sodium carbonate | Chlorine |       |
| Adhesives, sealants & functional fluids | 1.23                | 0.49      | --        | --      | --      | --      | --        | --      | 0.13     | 0.10          | 0.01    | --               | --               | --       | 1.96  |
| Aluminum metal                          | --                  | --        | --        | --      | --      | --      | --        | --      | --       | --            | --      | 1.63             | --               | --       | 1.63  |
| Animal feed                             | 0.03                | --        | --        | --      | --      | --      | --        | --      | 0.03     | 1.68          | 3.24    | --               | 0.25             | --       | 5.23  |
| Cigarettes                              | --                  | --        | --        | --      | --      | --      | --        | --      | 0.54     | 0.03          | --      | --               | --               | --       | 0.57  |
| Cleaning agents                         | 0.72                | 0.06      | --        | 0.16    | --      | --      | --        | --      | 0.10     | 0.08          | --      | 1.01             | 0.69             | 0.51     | 3.33  |
| Explosives                              | --                  | --        | --        | --      | --      | --      | --        | --      | --       | --            | 2.21    | --               | --               | --       | 2.21  |
| Fertilizers                             | --                  | --        | --        | --      | --      | --      | --        | --      | --       | 2.05          | 4.54    | --               | --               | --       | 6.59  |
| Food                                    | --                  | --        | --        | --      | --      | 0.02    | --        | 0.02    | --       | 1.07          | 2.01    | --               | 0.15             | --       | 3.27  |
| Gasoline                                | --                  | 0.02      | 6.02      | --      | 1.30    | 2.56    | --        | 37.9    | 0.63     | --            | --      | --               | --               | --       | 48.43 |
| Glass                                   | --                  | --        | --        | --      | --      | --      | --        | --      | --       | --            | --      | --               | 2.64             | --       | 2.64  |
| Health & personal care                  | 0.04                | 0.40      | --        | --      | --      | --      | --        | 0.25    | 0.12     | 0.06          | --      | 0.04             | 0.14             | --       | 1.05  |
| Lead acid batteries                     | --                  | --        | --        | --      | --      | --      | --        | --      | --       | 0.34          | --      | --               | 0.01             | --       | 0.35  |
| Mining & metals                         | 0.04                | 0.02      | --        | --      | --      | --      | --        | --      | --       | 2.20          | 0.09    | 0.11             | --               | --       | 2.46  |
| Nylon 6/66                              | 0.03                | 0.38      | --        | 0.93    | --      | --      | --        | --      | --       | --            | --      | --               | --               | --       | 1.34  |
| Other crops                             | --                  | --        | --        | --      | --      | --      | --        | --      | --       | 3.09          | 5.84    | --               | --               | --       | 8.93  |
| Other industrial uses                   | 0.32                | 0.06      | --        | --      | --      | --      | --        | --      | 0.02     | --            | --      | 0.51             | 0.27             | --       | 1.18  |
| Other polymers                          | 0.58                | 0.88      | --        | --      | 0.14    | --      | 0.05      | --      | 0.23     | --            | --      | --               | --               | --       | 1.88  |
| Paints & coatings                       | 0.43                | 0.83      | --        | --      | 0.04    | --      | --        | --      | 0.05     | --            | 0.02    | --               | 0.04             | 0.57     | 1.98  |
| Plastic/paper additives                 | 0.21                | 0.29      | --        | --      | --      | --      | --        | 0.04    | 0.01     | --            | --      | --               | --               | 0.28     | 0.83  |
| Polycarbonates                          | --                  | 0.66      | --        | --      | --      | --      | --        | --      | --       | --            | --      | 0.23             | --               | 0.37     | 1.26  |
| Polyethylene, high density              | 8.54                | --        | --        | --      | --      | --      | --        | --      | --       | --            | --      | --               | --               | --       | 8.54  |
| Polyethylene, low density               | 10.94               | --        | --        | --      | --      | --      | --        | --      | --       | --            | --      | --               | --               | --       | 10.94 |
| Polyethylene terephthalate              | 1.54                | 0.15      | --        | --      | 3.16    | --      | --        | --      | --       | --            | --      | --               | --               | --       | 4.85  |
| Polypropylene                           | --                  | 7.43      | --        | --      | --      | --      | --        | --      | --       | --            | --      | --               | --               | --       | 7.43  |
| Polystyrene                             | 0.50                | --        | --        | 1.42    | --      | --      | --        | --      | 0.02     | --            | --      | --               | --               | --       | 1.94  |
| Polyurethanes                           | 0.84                | --        | --        | 1.29    | --      | 0.28    | --        | --      | 0.05     | --            | --      | --               | --               | --       | 2.46  |
| Polyvinyl chloride                      | 3.13                | --        | --        | --      | 0.12    | --      | --        | --      | --       | --            | --      | --               | --               | 3.84     | 7.09  |
| Pulp & paper treatment                  | 0.03                | --        | --        | --      | --      | --      | --        | --      | 0.02     | 0.34          | --      | 2.18             | 0.12             | 0.13     | 2.82  |
| Rubbers                                 | 0.49                | 0.06      | 0.36      | --      | --      | --      | 0.35      | --      | 0.20     | --            | --      | --               | --               | --       | 1.46  |
| Solvents                                | --                  | 0.89      | --        | --      | --      | 0.56    | --        | 0.04    | 0.46     | --            | --      | --               | --               | --       | 1.95  |
| Water treatment                         | --                  | 0.12      | --        | --      | --      | --      | --        | --      | 0.04     | --            | --      | 1.29             | 0.05             | 1.32     | 2.82  |
| Wood laminates                          | 0.02                | 0.67      | --        | --      | --      | --      | --        | --      | 0.79     | --            | 0.66    | --               | --               | --       | 2.14  |

**Table S8.** Disposal of end-of-life chemicals by chemical class and disposal type, in million metric tons (Mt).

| Chemical                                  | Longer life (Mt) | Recycling / reuse (Mt) | Energy recover (Mt) | Landfill (Mt) | Wastewater (Mt) | Air emissions (Mt) | Land emissions (Mt) | Water emissions (Mt) | Other (Mt) | Total (Mt) |
|-------------------------------------------|------------------|------------------------|---------------------|---------------|-----------------|--------------------|---------------------|----------------------|------------|------------|
| Ethylene                                  | 3.60             | 1.90                   | 2.70                | 14.2          | 0.80            | 0.00               | 0.00                | 0.00                 | 0.50       | 23.7       |
| Propylene                                 | 2.30             | 0.60                   | 1.50                | 6.20          | 0.60            | 0.10               | 0.00                | 0.00                 | 1.30       | 12.6       |
| Butylenes                                 | 0.10             | 0.20                   | 6.30                | 0.10          | 0.00            | 0.00               | 0.00                | 0.00                 | 0.15       | 6.85       |
| Benzene                                   | 0.60             | 0.10                   | 0.40                | 2.30          | 0.15            | 0.00               | 0.00                | 0.00                 | 0.11       | 3.66       |
| Xylenes                                   | 0.30             | 0.80                   | 2.00                | 2.10          | 0.00            | 0.00               | 0.00                | 0.00                 | 0.15       | 5.35       |
| Toluene                                   | 0.10             | 0.20                   | 2.70                | 0.10          | 0.00            | 0.00               | 0.00                | 0.00                 | 0.31       | 3.41       |
| Butadiene                                 | 0.05             | 0.10                   | 0.10                | 0.20          | 0.00            | 0.00               | 0.00                | 0.00                 | 0.00       | 0.45       |
| Ethanol                                   | 0.14             | 0.04                   | 37.9                | 0.06          | 0.24            | 0.00               | 0.00                | 0.00                 | 0.02       | 38.4       |
| Methanol                                  | 0.90             | 0.37                   | 1.00                | 0.51          | 0.28            | 0.05               | 0.42                | 0.02                 | 0.74       | 4.29       |
| Sulfuric acid                             | 4.52             | 7.18                   | 0.08                | 0.13          | 2.75            | 0.07               | 2.72                | 0.02                 | 1.35       | 18.8       |
| Ammonia                                   | 8.69             | 2.00                   | 0.20                | 0.32          | 0.12            | 3.04               | 5.11                | 0.00                 | 1.51       | 21.0       |
| Sodium hydroxide                          | 0.49             | 0.31                   | 0.21                | 1.16          | 4.61            | 0.00               | 0.00                | 0.02                 | 0.01       | 6.81       |
| Sodium carbonate                          | 1.27             | 0.55                   | 0.23                | 1.22          | 0.98            | 0.00               | 0.10                | 0.02                 | 0.35       | 4.72       |
| Chlorine                                  | 2.21             | 0.82                   | 0.48                | 1.23          | 2.01            | 0.03               | 0.00                | 0.01                 | 0.84       | 7.63       |
| Total                                     | 25.3             | 15.2                   | 55.8                | 29.8          | 12.5            | 3.29               | 8.35                | 0.09                 | 7.42       | 157.7      |
| Ethylene – circularity targets            | 3.57             | 9.15                   | 2.65                | 6.97          | 0.82            | 0.00               | 0.00                | 0.03                 | 0.51       | 23.7       |
| Propylene – circularity targets           | 2.34             | 3.97                   | 1.54                | 2.86          | 0.58            | 0.07               | 0.00                | 0.01                 | 1.17       | 12.5       |
| Butylenes – circularity targets           | 0.05             | 0.27                   | 6.26                | 0.06          | 0.00            | 0.00               | 0.00                | 0.00                 | 0.18       | 6.83       |
| Benzene – circularity targets             | 0.63             | 1.38                   | 0.36                | 1.02          | 0.16            | 0.00               | 0.00                | 0.00                 | 0.11       | 3.66       |
| Xylenes – circularity targets             | 0.33             | 1.79                   | 1.96                | 1.08          | 0.00            | 0.02               | 0.00                | 0.00                 | 0.13       | 5.32       |
| Toluene – circularity targets             | 0.08             | 0.23                   | 2.72                | 0.06          | 0.00            | 0.03               | 0.00                | 0.00                 | 0.27       | 3.39       |
| Butadiene – circularity targets           | 0.05             | 0.20                   | 0.10                | 0.08          | 0.00            | 0.00               | 0.00                | 0.00                 | 0.02       | 0.45       |
| Ethanol – circularity targets             | 0.17             | 0.04                   | 37.9                | 0.04          | 0.24            | 0.00               | 0.00                | 0.01                 | 0.02       | 38.4       |
| Methanol – circularity targets            | 0.90             | 0.55                   | 0.98                | 0.33          | 0.28            | 0.05               | 0.42                | 0.02                 | 0.74       | 4.26       |
| Sulfuric acid – circularity targets       | 4.69             | 7.11                   | 0.06                | 0.07          | 2.75            | 0.07               | 2.71                | 0.02                 | 1.34       | 18.8       |
| Ammonia – circularity targets             | 9.01             | 1.88                   | 0.17                | 0.18          | 0.11            | 3.04               | 8.31                | 0.00                 | 1.50       | 21.0       |
| Sodium hydroxide – circularity targets    | 0.49             | 0.79                   | 0.13                | 0.77          | 4.61            | 0.00               | 0.00                | 0.02                 | 0.00       | 6.81       |
| Sodium carbonate – circularity targets    | 1.29             | 1.00                   | 0.23                | 0.75          | 0.98            | 0.00               | 0.09                | 0.02                 | 0.36       | 4.72       |
| Chlorine – circularity targets            | 2.21             | 1.46                   | 0.48                | 0.58          | 2.01            | 0.03               | 0.00                | 0.01                 | 0.85       | 7.62       |
| Total – circularity targets               | 25.8             | 29.8                   | 55.5                | 14.8          | 12.5            | 3.34               | 8.31                | 0.13                 | 7.20       | 157.5      |
| Ethylene – optimistic circularity         | 3.57             | 15.8                   | 0.85                | 2.15          | 0.82            | 0.00               | 0.00                | 0.03                 | 0.51       | 23.7       |
| Propylene – optimistic circularity        | 2.34             | 6.93                   | 0.75                | 1.06          | 0.58            | 0.07               | 0.00                | 0.01                 | 0.80       | 12.5       |
| Butylenes – optimistic circularity        | 0.05             | 0.35                   | 6.21                | 0.03          | 0.00            | 0.00               | 0.00                | 0.00                 | 0.18       | 6.83       |
| Benzene – optimistic circularity          | 0.63             | 2.32                   | 0.11                | 0.33          | 0.16            | 0.00               | 0.00                | 0.00                 | 0.11       | 3.66       |
| Xylenes – optimistic circularity          | 0.34             | 3.03                   | 1.63                | 0.17          | 0.00            | 0.02               | 0.00                | 0.00                 | 0.13       | 5.32       |
| Toluene – optimistic circularity          | 0.08             | 0.62                   | 2.58                | 0.04          | 0.00            | 0.03               | 0.00                | 0.00                 | 0.04       | 3.39       |
| Butadiene – optimistic circularity        | 0.05             | 0.28                   | 0.05                | 0.05          | 0.00            | 0.00               | 0.00                | 0.00                 | 0.02       | 0.45       |
| Ethanol – optimistic circularity          | 0.18             | 0.06                   | 37.9                | 0.03          | 0.24            | 0.00               | 0.00                | 0.01                 | 0.00       | 38.4       |
| Methanol – optimistic circularity         | 0.90             | 0.90                   | 0.87                | 0.30          | 0.28            | 0.06               | 0.42                | 0.02                 | 0.54       | 4.26       |
| Sulfuric acid – optimistic circularity    | 4.75             | 7.12                   | 0.05                | 0.02          | 2.75            | 0.07               | 2.71                | 0.02                 | 1.34       | 18.8       |
| Ammonia – optimistic circularity          | 9.11             | 1.91                   | 0.15                | 0.09          | 0.11            | 3.04               | 5.09                | 0.00                 | 1.50       | 21.0       |
| Sodium hydroxide – optimistic circularity | 0.48             | 1.28                   | 0.03                | 0.31          | 4.61            | 0.00               | 0.00                | 0.02                 | 0.00       | 6.73       |
| Sodium carbonate – optimistic circularity | 1.30             | 1.28                   | 0.16                | 0.53          | 0.98            | 0.00               | 0.09                | 0.02                 | 0.36       | 4.72       |
| Chlorine – optimistic circularity         | 2.21             | 1.49                   | 0.48                | 0.55          | 2.01            | 0.03               | 0.00                | 0.01                 | 0.85       | 7.62       |
| Total – optimistic circularity            | 26.0             | 43.3                   | 51.8                | 5.66          | 12.5            | 3.34               | 8.31                | 0.13                 | 6.38       | 157.4      |

**Table S9.** Quantity of the chemical class that is wasted each year in the United States (landfill, wastewater treatment, or emission to air, water, or land) with different circularity scenarios, in million metric tons (Mt). Total greenhouse gas (GHG) emissions associated with the production of each chemical class for applications that end up being wasted, in Mt carbon dioxide equivalent.

| Chemical         | Quantity wasted (Mt) | Circularity targets scenario                       |                                                    | Optimistic circularity scenario |                                                    |                                                    |
|------------------|----------------------|----------------------------------------------------|----------------------------------------------------|---------------------------------|----------------------------------------------------|----------------------------------------------------|
|                  |                      | Wasted GHG emissions, low (Mt CO <sub>2</sub> eq.) | Wasted GHG emission, high (Mt CO <sub>2</sub> eq.) | Quantity wasted (Mt)            | Wasted GHG emissions, low (Mt CO <sub>2</sub> eq.) | Wasted GHG emission, high (Mt CO <sub>2</sub> eq.) |
| Ethylene         | 7.82                 | 6.26                                               | 15.1                                               | 3.00                            | 2.40                                               | 5.78                                               |
| Propylene        | 3.53                 | 3.35                                               | 5.52                                               | 1.72                            | 1.63                                               | 2.69                                               |
| Butylenes        | 0.06                 | 0.11                                               | 0.15                                               | 0.04                            | 0.06                                               | 0.09                                               |
| Benzene          | 1.18                 | 1.45                                               | 2.37                                               | 0.49                            | 0.61                                               | 0.99                                               |
| Xylenes          | 1.11                 | 1.23                                               | 2.03                                               | 0.20                            | 0.22                                               | 0.36                                               |
| Toluene          | 0.09                 | 0.09                                               | 0.15                                               | 0.07                            | 0.07                                               | 0.12                                               |
| Butadiene        | 0.08                 | 0.09                                               | 0.18                                               | 0.05                            | 0.06                                               | 0.12                                               |
| Ethanol          | 0.28                 | 0.40                                               | 0.85                                               | 0.27                            | 0.40                                               | 0.83                                               |
| Methanol         | 1.09                 | 0.47                                               | 1.02                                               | 1.07                            | 0.46                                               | 0.99                                               |
| Sulfuric acid    | 5.60                 | 0.71                                               | 1.05                                               | 5.55                            | 0.70                                               | 1.04                                               |
| Ammonia          | 8.42                 | 4.30                                               | 28.6                                               | 8.33                            | 4.25                                               | 28.3                                               |
| Sodium hydroxide | 4.10                 | 4.84                                               | 11.2                                               | 3.65                            | 4.30                                               | 9.93                                               |
| Sodium carbonate | 1.84                 | 0.87                                               | 2.44                                               | 1.62                            | 0.77                                               | 2.15                                               |
| Chlorine         | 1.30                 | 1.43                                               | 2.91                                               | 1.27                            | 1.40                                               | 2.84                                               |

## References

- 1 S&P Global, *Chemical Economics Handbook (CEH)*, 2023.
- 2 S. R. Nicholson, N. A. Rorrer, T. Uekert, G. Avery, A. C. Carpenter and G. T. Beckham, *ACS Sustain. Chem. Eng.*, 2023, **11**, 2198–2208.
- 3 United States Department of Energy, *U.S. Ethane: Market Issues and Opportunities*, 2021.
- 4 S. R. Nicholson, N. A. Rorrer, A. C. Carpenter and G. T. Beckham, *Joule*, 2021, **5**, 673–686.
- 5 J. Di, B. K. Reck, A. Miatto and T. E. Graedel, *Resour. Conserv. Recycl.*, 2021, **167**, 105440.
- 6 T. P. Hendrickson, B. Bose, N. Vora, T. Huntington, S. L. Nordahl, B. A. Helms and C. D. Scown, *One Earth*, 2024, **7**, 520–531.
- 7 D. Ozokwelu and M. Mukherjee, *New Process Chemistry for Producing Styrene Monomer Saves Energy, Reduces Emissions*, 2012.
- 8 C. Liang, U. R. Gracida-Alvarez, E. T. Gallant, P. A. Gillis, Y. A. Marques, G. P. Abramo, T. R. Hawkins and J. B. Dunn, *Environ. Sci. Technol.*, 2021, **55**, 14215–14224.
- 9 Expanded HFC Data | US EPA, <https://www.epa.gov/climate-hfcs-reduction/hfc-data-hub/expanded-hfc-data>, (accessed 20 June 2024).
- 10 U.S. Refinery Net Production of Propylene (Thousand Barrels), [https://www.eia.gov/dnav/pet/hist/LeafHandler.ashx?n=PET&s=MPLRX\\_NUS\\_1&f=M](https://www.eia.gov/dnav/pet/hist/LeafHandler.ashx?n=PET&s=MPLRX_NUS_1&f=M), (accessed 20 June 2024).
- 11 Cumene - American Chemistry Council, <https://www.americanchemistry.com/industry-groups/cumene>, (accessed 20 June 2024).
- 12 Chinese acrylic acid supply to get better with change in policies and demand scenario, <https://www.beroeinc.com/article/acrylic-acid/>, (accessed 20 June 2024).
- 13 J. A. Okolie, *iScience*, 2022, **25**, 104903.
- 14 United States Environmental Protection Agency, *Acrylamide Supply Chain - Executive Summary*, 2022.
- 15 J. J. Cook and S. Booth, *Carbon Fiber Manufacturing Facility Siting and Policy Considerations: International Comparison*, 2017.
- 16 Superabsorbent Polymer Makers In The World And Their Production Capacities | Nonwovens Industry, [https://www.nonwovens-industry.com/issues/2021-01-01/view\\_far-east-report/superabsorbent-polymer-makers-in-the-world-and-their-production-capacities/](https://www.nonwovens-industry.com/issues/2021-01-01/view_far-east-report/superabsorbent-polymer-makers-in-the-world-and-their-production-capacities/), (accessed 20 June 2024).
- 17 J. T. Ku, A. Y. Chen and E. I. Lan, *Microb. Cell Fact.*, 2022, **21**, 1–11.
- 18 United States Environmental Protection Agency, *Bisphenol A Action Plan*, 2010.



- 19 North America Polycarbonate (PC) Market Size & Share Analysis - Industry Research Report - Growth Trends, <https://www.mordorintelligence.com/industry-reports/north-america-polycarbonate-pc-market>, (accessed 20 June 2024).
- 20 Chemical Data Reporting under the Toxic Substances Control Act | US EPA, <https://www.epa.gov/chemical-data-reporting>, (accessed 20 June 2024).
- 21 U.S. Oxygenate Plant Production of MTBE (Thousand Barrels), [https://www.eia.gov/dnav/pet/hist/LeafHandler.ashx?n=PET&s=M\\_EPOOXT\\_YOP\\_NUS\\_1&f=M](https://www.eia.gov/dnav/pet/hist/LeafHandler.ashx?n=PET&s=M_EPOOXT_YOP_NUS_1&f=M), (accessed 20 June 2024).
- 22 U.S. Biofuels Plant Net Production of Other Oxygenates (Thousand Barrels), [https://www.eia.gov/dnav/pet/hist/LeafHandler.ashx?n=PET&s=M\\_EPOOXO\\_YNP\\_NUS\\_MBBL&f=M](https://www.eia.gov/dnav/pet/hist/LeafHandler.ashx?n=PET&s=M_EPOOXO_YNP_NUS_MBBL&f=M), (accessed 20 June 2024).
- 23 Benzene | NC DOL, <https://www.labor.nc.gov/benzene>, (accessed 20 June 2024).
- 24 Fast Facts and Frequently Asked Questions - American Chemistry Council, <https://www.americanchemistry.com/industry-groups/diisocyanates-dii/fast-facts-and-frequently-asked-questions>, (accessed 20 June 2024).
- 25 Fast Facts and Frequently Asked Questions - American Chemistry Council, <https://www.americanchemistry.com/industry-groups/diisocyanates-dii/fast-facts-and-frequently-asked-questions>, (accessed 20 June 2024).
- 26 Benzoic Acid - The Chemical Company, <https://thechemco.com/chemical/benzoic-acid/>, (accessed 20 June 2024).
- 27 New methanol plants expected to increase industrial natural gas use through 2020 - U.S. Energy Information Administration (EIA), <https://www.eia.gov/todayinenergy/detail.php?id=38412>, (accessed 23 June 2024).
- 28 Risk Evaluation for Formaldehyde | US EPA, <https://www.epa.gov/assessing-and-managing-chemicals-under-tsca/risk-evaluation-formaldehyde>, (accessed 23 June 2024).
- 29 Fact Sheet: Methylene Chloride or Dichloromethane (DCM) | US EPA, <https://www.epa.gov/assessing-and-managing-chemicals-under-tsca/fact-sheet-methylene-chloride-or-dichloromethane-dcm-0>, (accessed 23 June 2024).
- 30 United States Cellulose Acetate Market Size & Share Analysis - Industry Research Report - Growth Trends, <https://www.mordorintelligence.com/industry-reports/united-states-cellulose-acetate-market>, (accessed 23 June 2024).
- 31 United States Environmental Protection Agency, *Preliminary Information on Manufacturing, Processing, Distribution, Use, and Disposal: Carbon Tetrachloride*, 2017.
- 32 Ethanol explained - supply of ethanol - U.S. Energy Information Administration (EIA), <https://www.eia.gov/energyexplained/biofuels/ethanol-supply.php>, (accessed 23 June 2024).
- 33 FAOSTAT, <https://www.fao.org/faostat/en/#data>, (accessed 23 June 2024).

- 34 United States Environmental Protection Agency, *Anhydrous Ammonia Supply Chain - Executive Summary*, 2022.
- 35 United States Geological Survey, *2019 Minerals Yearbook NITROGEN*, 2024.
- 36 M. Khramov, V. Monical and N. Koryabkina, *Process of catalytic ammoxidation for hydrogen cyanide production*, WO2009002482A1, 2008.
- 37 United States Government Accountability Office, *Chemical Safety: Actions Needed to Improve Federal Oversight of Facilities with Ammonium Nitrate*, 2014.
- 38 United States Environmental Protection Agency, *Chlorine Supply Chain - Executive Summary*, 2022.
- 39 S. T. Hobson, R. A. Richieri and M. H. Parseghian, *Toxicol. Mech. Methods*, 2021, **31**, 293–307.
- 40 United States Environmental Protection Agency, *Sodium Hypochlorite Supply Chain - Executive Summary*, 2022.
- 41 United States Environmental Protection Agency, *Calcium Hypochlorite Supply Chain - Executive Summary*, 2022.
- 42 United States Geological Survey, *Mineral Commodity Summaries: Titanium and Titanium Dioxide*, 2023.
- 43 United States Environmental Protection Agency, *Sodium Hydroxide Supply Chain Profile - Executive Summary*, 2022.
- 44 R. Whitfield, F. Brown and L. Wood, *The Economic Benefits of Sodium Hydroxide Chemistry in the Production of Organic Chemicals in the United States and Canada*, 2017.
- 45 United States Geological Survey, *Mineral Commodity Summaries: Bauxite and Alumina*, 2023.
- 46 United States Geological Survey, *Mineral Commodity Summaries: Aluminum*, 2023.
- 47 United States Environmental Protection Agency, *Aluminum Sulfate Supply Chain - Executive Summary*, 2022.
- 48 United States Environmental Protection Agency, *Sulfuric Acid Supply Chain - Executive Summary*, 2022.
- 49 United States Geological Survey, *Mineral Commodity Summaries: Sulfur*, 2023.
- 50 United States Geological Survey, *Mineral Commodity Summaries: Phosphate Rock*, 2023.
- 51 United States Geological Survey, *Mineral Commodity Summaries: Soda Ash*, 2023.
- 52 United States Environmental Protection Agency, *Sodium Carbonate Supply Chain - Executive Summary*, 2022.
- 53 M. D'Antonio, N. Hildt, Y. Patil, S. Moray, T. Shields and O. Sylvania, *Energy Efficiency Opportunities in the Glass Manufacturing Industry*, 2008.
- 54 United States Department of Energy, *Bandwidth Study on Energy Use and Potential Energy Savings Opportunities in the Manufacturing of Glass*, 2017.
- 55 G. Avery and A. Carpenter, *Supply Chain Energy and Greenhouse Gas Analysis Using the Materials Flows through Industry (MFI) Tool: Examination of Decarbonization Technology Scenarios for the U.S. Glass Manufacturing Sector*, 2023.

- 56 United States Environmental Protection Agency, *Sodium Silicate Supply Chain - Executive Summary*, 2022.
- 57 United States Environmental Protection Agency, *Silica Supply Chain - Executive Summary*, 2022.
- 58 National Overview: Facts and Figures on Materials, Wastes and Recycling | US EPA, <https://www.epa.gov/facts-and-figures-about-materials-waste-and-recycling/national-overview-facts-and-figures-materials>, (accessed 22 November 2021).
- 59 A. Angelidis, L. Crompton, T. Misselbrook, T. Yan, C. K. Reynolds and S. Stergiadis, *Agric. Ecosyst. Environ.*, 2019, **280**, 1–15.
- 60 United States Environmental Protection Agency, *Antifreeze Recycling: Best Environmental Practices for Auto Repair and Fleet Maintenance*, 1999.
- 61 United States Environmental Protection Agency, *Stormwater Best Management Practice Developing a Used Oil Recycling Program Minimum Measure*, 2021.
- 62 A. Isa, N. Nosbi, M. Che Ismail, H. Md Akil, W. F. F. Wan Ali and M. F. Omar, *Materials*, 2022, **15**, 4991.
- 63 J. Zhang, V. S. Chevali, H. Wang and C. H. Wang, *Compos. B Eng.*, 2020, **193**, 108053.
- 64 E. Furimsky, *Catal. Today*, 1996, **30**, 223–286.
- 65 T. E. Novotny and E. Slaughter, *Curr. Environ. Health Rep.*, 2014, **1**, 208–216.
- 66 U.S. Wastewater Treatment Factsheet | Center for Sustainable Systems, <https://css.umich.edu/us-wastewater-treatment-factsheet>, (accessed 20 June 2024).
- 67 Nutrients from septic systems can impact well and surface water - Water Quality, <https://www.canr.msu.edu/news/nutrients-from-septic-systems-can-impact-well-and-surface-water>, (accessed 20 June 2024).
- 68 L. Lassaletta, G. Billen, B. Grizzetti, J. Anglade and J. Garnier, *Environ. Res. Lett.*, 2014, **9**, 105011.
- 69 B. Pan, S. K. Lam, A. Mosier, Y. Luo and D. Chen, *Agric. Ecosyst. Environ.*, 2016, **232**, 283–289.
- 70 United States Environmental Protection Agency, *2019 Wasted Food Report: Estimates of generation and management of wasted food in the United States in 2019*, 2023.
- 71 A. Milbrandt, K. Coney, A. Badgett and G. T. Beckham, *Resour. Conserv. Recycl.*, 2022, **183**, 106363.
- 72 Avery Dennison, *The Missing Billions: The real cost of supply chain waste*, 2022.
- 73 Toxics Release Inventory (TRI) Program | US EPA, <https://www.epa.gov/toxics-release-inventory-tri-program>, (accessed 18 January 2024).
- 74 F. Matebese, A. K. Mosai, H. Tutu and Z. R. Tshentu, *Heliyon*, 2024, **10**, e24730.
- 75 United States Environmental Protection Agency, *Quantifying the Disposal of Post-Consumer Architectural Paint*, 2007.

- 76 Paint Products Stewardship Initiative | US EPA, <https://www.epa.gov/evaluate/paint-products-stewardship-initiative>, (accessed 20 June 2024).
- 77 A. Milbrandt, J. Zuboy, K. Coney and A. Badgett, *Waste Manag. Bulletin*, 2024, **2**, 21–28.
- 78 F. Maggi, F. H. M. Tang and F. N. Tubiello, *Nature*, 2023, **620**, 1013–1017.
- 79 Summary of Refrigerant Reclamation Trends | US EPA, <https://www.epa.gov/section608/summary-refrigerant-reclamation-trends>, (accessed 20 June 2024).
- 80 Nondurable Goods: Product-Specific Data | US EPA, <https://www.epa.gov/facts-and-figures-about-materials-waste-and-recycling/nondurable-goods-product-specific-data#DisposableDiapers>, (accessed 20 June 2024).
- 81 C. D. Westbroek, J. Bitting, M. Craglia, J. M. C. Azevedo and J. M. Cullen, *J. Ind. Ecol.*, 2021, **25**, 333–343.
- 82 United States 2030 Food Loss and Waste Reduction Goal | US EPA, <https://www.epa.gov/sustainable-management-food/united-states-2030-food-loss-and-waste-reduction-goal>, (accessed 19 June 2024).
- 83 U.S. National Recycling Goal | US EPA, <https://www.epa.gov/circulareconomy/us-national-recycling-goal>, (accessed 19 June 2024).
- 84 Zero Waste Europe and Eunomia, *How circular is glass?*, 2022.
- 85 T. Uekert, A. Singh, J. S. DesVeaux, T. Ghosh, A. Bhatt, G. Yadav, S. Afzal, J. Walzberg, K. M. Knauer, S. R. Nicholson, G. T. Beckham and A. C. Carpenter, *ACS Sustain. Chem. Eng.*, 2023, **11**, 965–978.
- 86 G. Tonsi, C. Maesani, S. Alini, M. A. Ortenzi and C. Pirola, *Chem. Eng. Trans.*, 2023, **100**, 727–732.
- 87 PaintCare, *Colorado Paint Stewardship Program 2018 Annual Report*, 2019.
- 88 C. Liang, U. R. Gracida-Alvarez, E. T. Gallant, P. A. Gillis, Y. A. Marques, G. P. Abramo, T. R. Hawkins and J. B. Dunn, *Environ. Sci. Technol.*, 2021, **55**, 14215–14224.
- 89 G. Rossignolo, G. Malucelli and A. Lorenzetti, *Green Chem.*, 2024, **26**, 1132–1152.
