# Supplementary material for: Mapping the end-of-life of chemicals for circular economy opportunities
Source: Royal Society of Chemistry journal article supplement (doi:10.1039/d4su00517a), 2024-01-01
Supplement: d4su00517a2.xlsx [file d4su00517a2.xlsx]

## Sheet: Overall
From	Subcategory	To	Quantity (Mt)	Component A	Quantity A	Component B	Quantity B
Ethylene	N/A	Tier 1	9.09
Ethylene	N/A	HDPE	8.48
Ethylene	N/A	LDPE	10.67
Ethylene	N/A	Other	3.78
Ethylene	N/A	Losses	0.19
Ethylene	N/A	Tier 2	0.41
Propylene	N/A	Tier 1	5.21
Propylene	N/A	PP	7.43
Propylene	N/A	Other	1.84
Propylene	N/A	Losses	0.85
Butylenes	N/A	Tier 1	1.87
Butylenes	N/A	Gasoline	6.02
Butylenes	N/A	Other	0.59
Butadiene	N/A	Tier 1	0.46
Butadiene	N/A	Tier 2	0.3
Butadiene	N/A	Tier 3	0.42
Butadiene	N/A	Other polymers	0.05
Butadiene	N/A	Other	0.11
Butadiene	N/A	Losses	0.05
Benzene	N/A	Tier 1	6.08
Benzene	N/A	Losses	0.03
Toluene	N/A	Gasoline	2.56
Toluene	N/A	Solvent	0.56
Toluene	N/A	Tier 1	0.22
Toluene	N/A	Losses	0.12
Xylenes	N/A	Gasoline	1.3
Xylenes	N/A	Tier 1	2.47
Xylenes	N/A	Losses	0.71
Methanol	N/A	Biodiesel	0.63
Methanol	N/A	Solvent	0.46
Methanol	N/A	Tier 1	3.87
Methanol	N/A	Tier 2	0.27
Methanol	N/A	Tier 3	0.28
Methanol	N/A	Other	0.18
Methanol	N/A	Losses	0.58
Ethanol	N/A	Gasoline	37.88
Ethanol	N/A	Solvent	0.04
Ethanol	N/A	Paper and plastic additives	0.04
Ethanol	N/A	Pharmaceuticals	0.16
Ethanol	N/A	Food	0.2
Ethanol	N/A	Personal care	0.09
Ethanol	N/A	Tier 1	0.55
Ethanol	N/A	Other	0.3
Ammonia	N/A	Fertilizers	3.41
Ammonia	N/A	Tier 1	11.87
Ammonia	N/A	Tier 2	2.13
Ammonia	N/A	Other	0.13
Ammonia	N/A	Losses	1.18
Chlorine	N/A	Pulp and paper	0.04
Chlorine	N/A	Water treatment	0.64
Chlorine	N/A	Tier 1	8.08
Chlorine	N/A	Tier 2	0.26
Chlorine	N/A	Tier 3	0.1
Chlorine	N/A	Tier 4	0.03
Chlorine	N/A	Other	0.27
Chlorine	N/A	Losses	1.26
Sodium hydroxide	N/A	PC	0.23
Sodium hydroxide	N/A	Other industrial uses	0.28
Sodium hydroxide	N/A	Cleaning agents	1.01
Sodium hydroxide	N/A	Pulp and paper	1.66
Sodium hydroxide	N/A	Water treatment	0.33
Sodium hydroxide	N/A	Tier 1	2.76
Sodium hydroxide	N/A	Tier 2	0.4
Sodium hydroxide	N/A	Other	2.54
Sulfuric acid	N/A	Cleaning agents	0.08
Sulfuric acid	N/A	Metals and mining	2.19
Sulfuric acid	N/A	Lead acid batteries	0.34
Sulfuric acid	N/A	Cigarettes	0.03
Sulfuric acid	N/A	Pulp and paper	0.34
Sulfuric acid	N/A	Fertilizers	2.25
Sulfuric acid	N/A	Tier 1	11.55
Sulfuric acid	N/A	Tier 2	1.29
Sulfuric acid	N/A	Tier 3	1.1
Sulfuric acid	N/A	Other	1.15
Sulfuric acid	N/A	Losses	7.08
Sodium carbonate	N/A	Glass	2.64
Sodium carbonate	N/A	Cleaning agents	0.33
Sodium carbonate	N/A	Tier 1	1.68
Other	N/A	Tier 1	42.38
Other	N/A	Tier 2	4.42
Other	N/A	Tier 3	0.13
Other	N/A	Glass	11.59
Other	N/A	Paints and coatings	0.01
Other	N/A	Paper and plastic additives	0.16
Other	N/A	Rubbers	1.16
Tier 1	Ethylene	Exports	0.8
Tier 1	Ethylene	Tier 2	22.04	Ethylene	9.6	Chlorine	9.42	Benzene	3.02
Tier 1	Ethylene	Personal care	0.01
Tier 1	Ethylene	Animal feed	0.03
Tier 1	Ethylene	Other	0.16
Tier 1	Ethylene	Side products	4.09
Tier 1	Ethylene	Losses	0.63
Tier 1	Propylene	Exports	0.64
Tier 1	Propylene	Tier 2	6.45
Tier 1	Propylene	Other industrial uses	0.06
Tier 1	Propylene	Other polymers	0.48
Tier 1	Propylene	Cleaning agents	0.05
Tier 1	Propylene	Paper and plastic additives	0.2
Tier 1	Propylene	Water treatment	0.04
Tier 1	Propylene	Solvent	0.27
Tier 1	Propylene	Functional fluids	0.02
Tier 1	Propylene	Paints and coatings	0.09
Tier 1	Propylene	Pharmaceuticals	0.17
Tier 1	Propylene	Adhesives and sealants	0.09
Tier 1	Propylene	Other	0.38
Tier 1	Propylene	Side products	4.2
Tier 1	Propylene	By-product HCl	0.18
Tier 1	Propylene	Losses	0.22
Tier 1	Butylenes	Exports	1.78
Tier 1	Butylenes	Tier 2	0.46
Tier 1	Butylenes	Gasoline	0.21
Tier 1	Butylenes	Losses	0.47
Tier 1	Butadiene	Exports	0.11
Tier 1	Butadiene	Rubbers	0.35
Tier 1	Benzene	Exports	0.22
Tier 1	Benzene	Tier 2	2.16
Tier 1	Benzene	Cleaning agents	0.16
Tier 1	Benzene	Other	0.14
Tier 1	Benzene	Side products	0.18
Tier 1	Toluene	Exports	0.08
Tier 1	Toluene	Tier 2	0.02
Tier 1	Toluene	PUR	0.28
Tier 1	Toluene	Paper and plastic additives	0.04
Tier 1	Toluene	Side products	0.22
Tier 1	Toluene	By-product HCl	0.28
Tier 1	Xylenes	Exports	0.39
Tier 1	Xylenes	Tier 2	1.96
Tier 1	Xylenes	Other	0.04
Tier 1	Xylenes	Losses	0.08
Tier 1	Methanol	Exports	0.07
Tier 1	Methanol	Tier 2	1.54
Tier 1	Methanol	Tier 3	0.18
Tier 1	Methanol	Tier 4	0.02
Tier 1	Methanol	Other polymers	0.16
Tier 1	Methanol	Wood laminates	0.79
Tier 1	Methanol	Cleaning agents	0.07
Tier 1	Methanol	Other industrial uses	0.02
Tier 1	Methanol	Animal feed	0.03
Tier 1	Methanol	Pulp and paper	0.02
Tier 1	Methanol	Water treatment	0.04
Tier 1	Methanol	Other	0.75
Tier 1	Methanol	Side products	0.38
Tier 1	Methanol	Losses	0.25
Tier 1	Ammonia	Exports	0.69
Tier 1	Ammonia	Tier 2	6.96
Tier 1	Ammonia	Tier 3	0.21
Tier 1	Ammonia	Animal feed	0.47
Tier 1	Ammonia	Wood laminates	0.63
Tier 1	Ammonia	Fertilizers	14.91
Tier 1	Ammonia	Metals and mining	0.04
Tier 1	Ammonia	Other	2.35
Tier 1	Ammonia	Losses	1.19
Tier 1	Ammonia	Side products	6.76
Tier 1	Chlorine	Exports	0.48
Tier 1	Chlorine	PC	0.37
Tier 1	Chlorine	Tier 3	1.04
Tier 1	Chlorine	Pulp and paper	0.09
Tier 1	Chlorine	Water treatment	0.68
Tier 1	Chlorine	Personal care	0.06
Tier 1	Chlorine	Cleaning agents	0.51
Tier 1	Chlorine	Paints and coatings	0.57
Tier 1	Chlorine	Paper and plastic additives	0.28
Tier 1	Chlorine	Other	0.18
Tier 1	Chlorine	Side products	1.05
Tier 1	Sodium hydroxide	Exports	0.05
Tier 1	Sodium hydroxide	Tier 2	0.62
Tier 1	Sodium hydroxide	Aluminum metal	1.63
Tier 1	Sodium hydroxide	Metals and mining	0.11
Tier 1	Sodium hydroxide	Pulp and paper	0.14
Tier 1	Sodium hydroxide	Water treatment	0.18
Tier 1	Sodium hydroxide	Other	0.28
Tier 1	Sodium hydroxide	Side products	0.14
Tier 1	Sulfuric acid	Exports	0.28
Tier 1	Sulfuric acid	Animal feed	0.22
Tier 1	Sulfuric acid	Fertilizers	5.76
Tier 1	Sulfuric acid	Metals and mining	0.01
Tier 1	Sulfuric acid	Functional fluids	0.1
Tier 1	Sulfuric acid	Pharmaceuticals	0.06
Tier 1	Sulfuric acid	Food	0.02
Tier 1	Sulfuric acid	Animal feed	0.03
Tier 1	Sulfuric acid	Other	0.53
Tier 1	Sulfuric acid	Losses	0.7
Tier 1	Sulfuric acid	Side products	16.02
Tier 1	Sodium carbonate	Exports	0.1
Tier 1	Sodium carbonate	Tier 2	0.43
Tier 1	Sodium carbonate	Cleaning agents	0.36
Tier 1	Sodium carbonate	Pulp and paper	0.11
Tier 1	Sodium carbonate	Other industrial uses	0.23
Tier 1	Sodium carbonate	Paints and coatings	0.03
Tier 1	Sodium carbonate	Pharmaceuticals	0.12
Tier 1	Sodium carbonate	Food	0.15
Tier 1	Sodium carbonate	Animal feed	0.23
Tier 1	Sodium carbonate	Water treatment	0.05
Tier 1	Sodium carbonate	Other	0.06
Tier 1	Sodium carbonate	Losses	0.36
Tier 2	Ethylene	Exports	3.57
Tier 2	Ethylene	Tier 3	0.54
Tier 2	Ethylene	Antifreeze	0.84
Tier 2	Ethylene	HDPE	0.06
Tier 2	Ethylene	LDPE	0.27
Tier 2	Ethylene	PET	1.4
Tier 2	Ethylene	PUR	0.84
Tier 2	Ethylene	Other industrial uses	0.28
Tier 2	Ethylene	Other polymers	0.5
Tier 2	Ethylene	Cleaning agents	0.7
Tier 2	Ethylene	Metals and mining	0.04
Tier 2	Ethylene	Wood laminates	0.02
Tier 2	Ethylene	Functional fluids	0.05
Tier 2	Ethylene	Paints and coatings	0.42
Tier 2	Ethylene	Pharmaceuticals	0.02
Tier 2	Ethylene	Personal care	0.01
Tier 2	Ethylene	PVC	6.97	Ethylene	3.13	Chlorine	3.84
Tier 2	Ethylene	PS	1.92	Ethylene	0.5	Benzene	1.42
Tier 2	Ethylene	Adhesives and sealants	0.28
Tier 2	Ethylene	Paper and plastic additives	0.06
Tier 2	Ethylene	Pulp and paper	0.03
Tier 2	Ethylene	Losses	0.72
Tier 2	Ethylene	Other	0.33
Tier 2	Ethylene	Side products	0.92
Tier 2	Ethylene	By-product HCl	4.89
Tier 2	Propylene	Exports	1.05
Tier 2	Propylene	Tier 3	2.59
Tier 2	Propylene	Tier 1	0.4
Tier 2	Propylene	Solvent	0.5
Tier 2	Propylene	Pharmaceuticals	0.23
Tier 2	Propylene	PET	0.15
Tier 2	Propylene	Other polymers	0.02
Tier 2	Propylene	PUR	0.03
Tier 2	Propylene	Cleaning agents	0.01
Tier 2	Propylene	Paints and coatings	0.55
Tier 2	Propylene	Rubbers	0.06
Tier 2	Propylene	Wood laminates	0.67
Tier 2	Propylene	Paper and plastic additives	0.07
Tier 2	Propylene	Adhesives and sealants	0.19
Tier 2	Propylene	Functional fluids	0.02
Tier 2	Propylene	Side products	0.14
Tier 2	Propylene	Losses	0.08
Tier 2	Propylene	Other	0.59
Tier 2	Butylenes	Exports	0.12
Tier 2	Butylenes	Rubbers	0.18
Tier 2	Butylenes	Side products	0.16
Tier 2	Benzene	Tier 3	0.85
Tier 2	Benzene	Nylons	0.93
Tier 2	Benzene	Other	0.3
Tier 2	Benzene	Losses	0.11
Tier 2	Benzene	Side products	0.96
Tier 2	Toluene	Food	0.02
Tier 2	Xylenes	Exports	0.03
Tier 2	Xylenes	PET	3.16
Tier 2	Xylenes	PVC	0.12
Tier 2	Xylenes	Other polymers	0.14
Tier 2	Xylenes	Paints and coatings	0.04
Tier 2	Xylenes	Other	0.07
Tier 2	Xylenes	Side products	0.75
Tier 2	Methanol	Tier 3	0.7
Tier 2	Methanol	Functional fluids	0.01
Tier 2	Methanol	Paints and coatings	0.03
Tier 2	Methanol	Adhesives and sealants	0.02
Tier 2	Methanol	Pharmaceuticals	0.06
Tier 2	Methanol	Cigarettes	0.54
Tier 2	Methanol	Other	0.15
Tier 2	Methanol	Side products	0.1
Tier 2	Methanol	By-product HCl	0.09
Tier 2	Ammonia	Exports	0.14
Tier 2	Ammonia	Fertilizers	5.41
Tier 2	Ammonia	Explosives	2.21
Tier 2	Ammonia	Paints and coatings	0.02
Tier 2	Ammonia	Adhesives and sealants	0.01
Tier 2	Ammonia	Wood laminates	0.03
Tier 2	Ammonia	Metals and mining	0.05
Tier 2	Ammonia	Other	0.03
Tier 2	Ammonia	Side products	0.23
Tier 2	Sodium hydroxide	Tier 1	0.13
Tier 2	Sodium hydroxide	Personal care	0.04
Tier 2	Sodium hydroxide	Pulp and paper	0.38
Tier 2	Sodium hydroxide	Water treatment	0.78
Tier 2	Sodium hydroxide	Other industrial uses	0.23
Tier 2	Sodium hydroxide	Side products	0.22
Tier 2	Sodium carbonate	Personal care	0.02
Tier 2	Sodium carbonate	Paints and coatings	0.01
Tier 2	Sodium carbonate	Rubbers	0.07
Tier 2	Sodium carbonate	Food	0.01
Tier 2	Sodium carbonate	Animal feed	0.02
Tier 2	Sodium carbonate	Pulp and paper	0.01
Tier 2	Sodium carbonate	Other industrial uses	0.04
Tier 2	Sodium carbonate	Lead acid batteries	0.01
Tier 2	Sodium carbonate	Other	0.05
Tier 2	Sodium carbonate	Side products	0.57
Tier 3	Ethylene	Exports	0.03
Tier 3	Ethylene	PET	0.14
Tier 3	Ethylene	Cleaning agents	0.02
Tier 3	Ethylene	Other industrial uses	0.04
Tier 3	Ethylene	Functional fluids	0.02
Tier 3	Ethylene	Paints and coatings	0.01
Tier 3	Ethylene	Paper and plastic additives	0.15
Tier 3	Ethylene	Other polymers	0.08
Tier 3	Ethylene	Rubbers	0.49
Tier 3	Ethylene	Nylons	0.03
Tier 3	Ethylene	Other	0.01
Tier 3	Ethylene	By-product HCl	0.07
Tier 3	Propylene	Exports	0.3
Tier 3	Propylene	Tier 4	0.09
Tier 3	Propylene	Tier 2	0.06
Tier 3	Propylene	Metals and mining	0.02
Tier 3	Propylene	Solvent	0.02
Tier 3	Propylene	Paper and plastic additives	0.02
Tier 3	Propylene	Gasoline	0.02
Tier 3	Propylene	Water treatment	0.08
Tier 3	Propylene	Paints and coatings	0.19
Tier 3	Propylene	Other polymers	0.38
Tier 3	Propylene	Nylons	0.38
Tier 3	Propylene	Adhesives and sealants	0.17
Tier 3	Propylene	PC	0.66
Tier 3	Propylene	Other	0.2
Tier 3	Propylene	Side products	1.47
Tier 3	Propylene	Losses	0.19
Tier 3	Benzene	PUR	1.29
Tier 3	Benzene	Side products	0.08
Tier 3	Benzene	By-product HCl	0.77
Tier 3	Methanol	Tier 4	0.34
Tier 3	Methanol	Side products	0.4
Tier 3	Methanol	Losses	0.02
Tier 3	Methanol	Functional fluids	0.07
Tier 3	Methanol	Pharmaceuticals	0.01
Tier 3	Methanol	Cleaning agents	0.03
Tier 3	Methanol	Paints and coatings	0.02
Tier 3	Methanol	Paper and plastic additives	0.01
Tier 3	Methanol	Adhesives and sealants	0.01
Tier 3	Methanol	Personal care	0.05
Tier 4	Propylene	Paints and coatings	0.01
Tier 4	Propylene	Solvent	0.1
Tier 4	Methanol	Functional fluids	0.02
Tier 4	Methanol	PUR	0.05
Tier 4	Methanol	PS	0.02
Tier 4	Methanol	Rubbers	0.2
Tier 4	Methanol	Other polymers	0.07
Tier 4	Methanol	By-product HCl	0.07
By-product HCl	N/A	Tier 1	6.24
Imports	Ethylene	Tier 2	0.11
Imports	Ethylene	Tier 3	0.07
Imports	Propylene	Tier 1	0.13
Imports	Propylene	Tier 2	0.11
Imports	Propylene	Tier 3	0.02
Imports	Benzene	Tier 1	0.13
Imports	Benzene	Tier 2	0.1
Imports	Benzene	Tier 3	0.07
Imports	Xylenes	Tier 2	0.47
Imports	Methanol	Tier 1	0.4
Imports	Methanol	Tier 2	0.11
Imports	Methanol	Tier 3	0.06
Imports	Methanol	Tier 4	0.03
Imports	Ammonia	Tier 1	6.85
Imports	Chlorine	Tier 1	0.23
Imports	Sodium hydroxide	Tier 1	1.36
Imports	Sodium hydroxide	Tier 2	0.28
Imports	Sulfuric acid	Tier 1	0.09
Imports	Sodium carbonate	Tier 1	0.19
Imports	Sodium carbonate	Tier 2	0.03
HDPE	Ethylene	Exports	1.38
HDPE	Ethylene	Longer lifetime	0.5728
HDPE	Ethylene	Recycling	0.592848
HDPE	Ethylene	Energy recovery	0.856336
HDPE	Ethylene	Incineration	0
HDPE	Ethylene	Landfill	5.07214
HDPE	Ethylene	Emission to air	0
HDPE	Ethylene	Emission to land	0
HDPE	Ethylene	Emission to water	0
HDPE	Ethylene	Wastewater	0
HDPE	Ethylene	Other	0.07
LDPE/LLDPE	Ethylene	Exports	4.38
LDPE/LLDPE	Ethylene	Longer lifetime	0.2624
LDPE/LLDPE	Ethylene	Recycling	0.31488
LDPE/LLDPE	Ethylene	Energy recovery	0.94464
LDPE/LLDPE	Ethylene	Incineration	0
LDPE/LLDPE	Ethylene	Landfill	4.9751
LDPE/LLDPE	Ethylene	Emission to air	0
LDPE/LLDPE	Ethylene	Emission to land	0
LDPE/LLDPE	Ethylene	Emission to water	0
LDPE/LLDPE	Ethylene	Wastewater	0
LDPE/LLDPE	Ethylene	Other	0.06
PVC	Ethylene	Exports	0.89
PVC	Ethylene	Longer lifetime	1.3664
PVC	Ethylene	Recycling	0.008736
PVC	Ethylene	Energy recovery	0.113568
PVC	Ethylene	Incineration	0
PVC	Ethylene	Landfill	0.74256
PVC	Ethylene	Emission to air	0
PVC	Ethylene	Emission to land	0
PVC	Ethylene	Emission to water	0
PVC	Ethylene	Wastewater	0
PVC	Ethylene	Other	0.01
PET	Ethylene	Exports	0.07
PET	Ethylene	Longer lifetime	0.117866
PET	Ethylene	Recycling	0.216873
PET	Ethylene	Energy recovery	0.176209
PET	Ethylene	Incineration	0
PET	Ethylene	Landfill	0.962372
PET	Ethylene	Emission to air	0
PET	Ethylene	Emission to land	0
PET	Ethylene	Emission to water	0
PET	Ethylene	Wastewater	0
Rubbers	Ethylene	Exports	0
Rubbers	Ethylene	Longer lifetime	0.0637
Rubbers	Ethylene	Recycling	0.102312
Rubbers	Ethylene	Energy recovery	0.132153
Rubbers	Ethylene	Incineration	0
Rubbers	Ethylene	Landfill	0.191835
Rubbers	Ethylene	Emission to air	0
Rubbers	Ethylene	Emission to land	0
Rubbers	Ethylene	Emission to water	0
Rubbers	Ethylene	Wastewater	0
Imports	N/A	PS	0.13
PS	Ethylene	Longer lifetime	0.100619
PS	Ethylene	Recycling	0.0105649
PS	Ethylene	Energy recovery	0.0792371
PS	Ethylene	Incineration	0
PS	Ethylene	Landfill	0.438445
PS	Ethylene	Emission to air	0
PS	Ethylene	Emission to land	0
PS	Ethylene	Emission to water	0
PS	Ethylene	Wastewater	0
PUR	Ethylene	Exports	0.22
PUR	Ethylene	Longer lifetime	0.1798
PUR	Ethylene	Recycling	0.039618
PUR	Ethylene	Energy recovery	0.035216
PUR	Ethylene	Incineration	0
PUR	Ethylene	Landfill	0.343356
PUR	Ethylene	Emission to air	0
PUR	Ethylene	Emission to land	0
PUR	Ethylene	Emission to water	0
PUR	Ethylene	Wastewater	0
PUR	Ethylene	Other	0.01
Nylon 6 and 66	Ethylene	Exports	0.01
Nylon 6 and 66	Ethylene	Longer lifetime	0.0022
Nylon 6 and 66	Ethylene	Recycling	0
Nylon 6 and 66	Ethylene	Energy recovery	0.001424
Nylon 6 and 66	Ethylene	Incineration	0
Nylon 6 and 66	Ethylene	Landfill	0.016376
Nylon 6 and 66	Ethylene	Emission to air	0
Nylon 6 and 66	Ethylene	Emission to land	0
Nylon 6 and 66	Ethylene	Emission to water	0
Nylon 6 and 66	Ethylene	Wastewater	0
Nylon 6 and 66	Ethylene	Other	0.01
Other polymers	Ethylene	Exports	0
Other polymers	Ethylene	Longer lifetime	0.0348
Other polymers	Ethylene	Recycling	0.038164
Other polymers	Ethylene	Energy recovery	0.049068
Other polymers	Ethylene	Incineration	0
Other polymers	Ethylene	Landfill	0.447064
Other polymers	Ethylene	Emission to air	0
Other polymers	Ethylene	Emission to land	0
Other polymers	Ethylene	Emission to water	0
Other polymers	Ethylene	Wastewater	0
Animal feed	Ethylene	Exports	0
Animal feed	Ethylene	Longer lifetime	0.0075
Animal feed	Ethylene	Recycling	0.01125
Animal feed	Ethylene	Energy recovery	0
Animal feed	Ethylene	Incineration	0
Animal feed	Ethylene	Landfill	0
Animal feed	Ethylene	Emission to air	0
Animal feed	Ethylene	Emission to land	0.01125
Animal feed	Ethylene	Emission to water	0
Animal feed	Ethylene	Wastewater	0
Wood laminates	Ethylene	Exports	0
Wood laminates	Ethylene	Longer lifetime	0.019
Wood laminates	Ethylene	Recycling	0
Wood laminates	Ethylene	Energy recovery	0
Wood laminates	Ethylene	Incineration	0
Wood laminates	Ethylene	Landfill	0.001
Wood laminates	Ethylene	Emission to air	0
Wood laminates	Ethylene	Emission to land	0
Wood laminates	Ethylene	Emission to water	0
Wood laminates	Ethylene	Wastewater	0
Metals and mining	Ethylene	Exports	0
Metals and mining	Ethylene	Longer lifetime	0
Metals and mining	Ethylene	Recycling	0
Metals and mining	Ethylene	Energy recovery	0
Metals and mining	Ethylene	Incineration	0
Metals and mining	Ethylene	Landfill	0
Metals and mining	Ethylene	Emission to air	0
Metals and mining	Ethylene	Emission to land	0
Metals and mining	Ethylene	Emission to water	0
Metals and mining	Ethylene	Wastewater	0.04
Cleaning agents	Ethylene	Exports	0
Cleaning agents	Ethylene	Longer lifetime	0
Cleaning agents	Ethylene	Recycling	0
Cleaning agents	Ethylene	Energy recovery	0
Cleaning agents	Ethylene	Incineration	0
Cleaning agents	Ethylene	Landfill	0
Cleaning agents	Ethylene	Emission to air	0
Cleaning agents	Ethylene	Emission to land	0
Cleaning agents	Ethylene	Emission to water	0.0144
Cleaning agents	Ethylene	Wastewater	0.7056
Paints	Ethylene	Exports	0
Paints	Ethylene	Longer lifetime	0.387
Paints	Ethylene	Recycling	0.01161
Paints	Ethylene	Energy recovery	0
Paints	Ethylene	Incineration	0
Paints	Ethylene	Landfill	0.03139
Paints	Ethylene	Emission to air	0
Paints	Ethylene	Emission to land	0
Paints	Ethylene	Emission to water	0
Paints	Ethylene	Wastewater	0
Personal care	Ethylene	Exports	0
Personal care	Ethylene	Longer lifetime	0
Personal care	Ethylene	Recycling	0
Personal care	Ethylene	Energy recovery	0
Personal care	Ethylene	Incineration	0
Personal care	Ethylene	Landfill	0.0012
Personal care	Ethylene	Emission to air	0
Personal care	Ethylene	Emission to land	0
Personal care	Ethylene	Emission to water	0.0004
Personal care	Ethylene	Wastewater	0.0184
Antifreeze	Ethylene	Exports	0
Antifreeze	Ethylene	Longer lifetime	0
Antifreeze	Ethylene	Recycling	0.1008
Antifreeze	Ethylene	Energy recovery	0
Antifreeze	Ethylene	Incineration	0
Antifreeze	Ethylene	Landfill	0.7392
Antifreeze	Ethylene	Emission to air	0
Antifreeze	Ethylene	Emission to land	0
Antifreeze	Ethylene	Emission to water	0
Antifreeze	Ethylene	Wastewater	0
Pulp and paper treatment	Ethylene	Exports	0
Pulp and paper treatment	Ethylene	Longer lifetime	0
Pulp and paper treatment	Ethylene	Recycling	0
Pulp and paper treatment	Ethylene	Energy recovery	0
Pulp and paper treatment	Ethylene	Incineration	0
Pulp and paper treatment	Ethylene	Landfill	0
Pulp and paper treatment	Ethylene	Emission to air	0
Pulp and paper treatment	Ethylene	Emission to land	0
Pulp and paper treatment	Ethylene	Emission to water	0
Pulp and paper treatment	Ethylene	Wastewater	0.03
Health care	Ethylene	Exports	0
Health care	Ethylene	Longer lifetime	0
Health care	Ethylene	Recycling	0
Health care	Ethylene	Energy recovery	0
Health care	Ethylene	Incineration	0
Health care	Ethylene	Landfill	0.0006
Health care	Ethylene	Emission to air	0
Health care	Ethylene	Emission to land	0
Health care	Ethylene	Emission to water	0.0004
Health care	Ethylene	Wastewater	0.019
Paper and plastic additives	Ethylene	Exports	0
Paper and plastic additives	Ethylene	Longer lifetime	0
Paper and plastic additives	Ethylene	Recycling	0.0504
Paper and plastic additives	Ethylene	Energy recovery	0.0231
Paper and plastic additives	Ethylene	Incineration	0
Paper and plastic additives	Ethylene	Landfill	0.1365
Paper and plastic additives	Ethylene	Emission to air	0
Paper and plastic additives	Ethylene	Emission to land	0
Paper and plastic additives	Ethylene	Emission to water	0
Paper and plastic additives	Ethylene	Wastewater	0
Adhesives and sealants	Ethylene	Exports	0
Adhesives and sealants	Ethylene	Longer lifetime	0.3008
Adhesives and sealants	Ethylene	Recycling	0
Adhesives and sealants	Ethylene	Energy recovery	0
Adhesives and sealants	Ethylene	Incineration	0
Adhesives and sealants	Ethylene	Landfill	0.0192
Adhesives and sealants	Ethylene	Emission to air	0
Adhesives and sealants	Ethylene	Emission to land	0
Adhesives and sealants	Ethylene	Emission to water	0
Adhesives and sealants	Ethylene	Wastewater	0
Other industrial use	Ethylene	Exports	0
Other industrial use	Ethylene	Longer lifetime	0.16
Other industrial use	Ethylene	Recycling	0.048
Other industrial use	Ethylene	Energy recovery	0
Other industrial use	Ethylene	Incineration	0
Other industrial use	Ethylene	Landfill	0.112
Other industrial use	Ethylene	Emission to air	0
Other industrial use	Ethylene	Emission to land	0
Other industrial use	Ethylene	Emission to water	0
Other industrial use	Ethylene	Wastewater	0
Functional fluids	Ethylene	Exports	0
Functional fluids	Ethylene	Longer lifetime	0
Functional fluids	Ethylene	Recycling	0.028
Functional fluids	Ethylene	Energy recovery	0.0322
Functional fluids	Ethylene	Incineration	0
Functional fluids	Ethylene	Landfill	0
Functional fluids	Ethylene	Emission to air	0
Functional fluids	Ethylene	Emission to land	0
Functional fluids	Ethylene	Emission to water	0.0098
Functional fluids	Ethylene	Wastewater	0
Losses	Ethylene	Exports	0
Losses	Ethylene	Longer lifetime	0
Losses	Ethylene	Recycling	0.31109
Losses	Ethylene	Energy recovery	0.210978
Losses	Ethylene	Incineration	0.014156
Losses	Ethylene	Landfill	0.013578
Losses	Ethylene	Emission to air	0.004714
Losses	Ethylene	Emission to land	0
Losses	Ethylene	Emission to water	0
Losses	Ethylene	Wastewater	0.0054
Losses	Ethylene	Other polymers	0.335
PP	Propylene	Exports	1.63
PP	Propylene	Longer lifetime	0.35
PP	Propylene	Recycling	0.05
PP	Propylene	Energy recovery	0.65
PP	Propylene	Incineration	0
PP	Propylene	Landfill	4.69
PP	Propylene	Emission to air	0
PP	Propylene	Emission to land	0
PP	Propylene	Emission to water	0
PP	Propylene	Wastewater	0
PP	Propylene	Other	0.05
PET	Propylene	Exports	0.00649485
PET	Propylene	Longer lifetime	0.0114804
PET	Propylene	Recycling	0.021124
PET	Propylene	Energy recovery	0.0171632
PET	Propylene	Incineration	0
PET	Propylene	Landfill	0.0937376
PET	Propylene	Emission to air	0
PET	Propylene	Emission to land	0
PET	Propylene	Emission to water	0
PET	Propylene	Wastewater	0
PET	Propylene	Other	0
Rubbers	Propylene	Exports	0
Rubbers	Propylene	Longer lifetime	0.0078
Rubbers	Propylene	Recycling	0.012528
Rubbers	Propylene	Energy recovery	0.016182
Rubbers	Propylene	Incineration	0
Rubbers	Propylene	Landfill	0.02349
Rubbers	Propylene	Emission to air	0
Rubbers	Propylene	Emission to land	0
Rubbers	Propylene	Emission to water	0
Rubbers	Propylene	Wastewater	0
Rubbers	Propylene	Other	0
PUR	Propylene	Exports	0.01
PUR	Propylene	Longer lifetime	0.0058
PUR	Propylene	Recycling	0.001278
PUR	Propylene	Energy recovery	0.001136
PUR	Propylene	Incineration	0
PUR	Propylene	Landfill	0.011076
PUR	Propylene	Emission to air	0
PUR	Propylene	Emission to land	0
PUR	Propylene	Emission to water	0
PUR	Propylene	Wastewater	0
PUR	Propylene	Other	0.00071
Nylon 6 and 66	Propylene	Exports	0.13
Nylon 6 and 67	Propylene	Longer lifetime	0.0275
Nylon 6 and 68	Propylene	Recycling	0
Nylon 6 and 69	Propylene	Energy recovery	0.0178
Nylon 6 and 70	Propylene	Incineration	0
Nylon 6 and 71	Propylene	Landfill	0.2047
Nylon 6 and 72	Propylene	Emission to air	0
Nylon 6 and 73	Propylene	Emission to land	0
Nylon 6 and 74	Propylene	Emission to water	0
Nylon 6 and 75	Propylene	Wastewater	0
Nylon 6 and 76	Propylene	Other	0
PC	Propylene	Exports	0.434762
PC	Propylene	Longer lifetime	0.0473
PC	Propylene	Recycling	0.0160144
PC	Propylene	Energy recovery	0.0160144
PC	Propylene	Incineration	0
PC	Propylene	Landfill	0.145909
PC	Propylene	Emission to air	0
PC	Propylene	Emission to land	0
PC	Propylene	Emission to water	0
PC	Propylene	Wastewater	0
PC	Propylene	Other	0
Other polymers	Propylene	Exports	0
Other polymers	Propylene	Longer lifetime	0.0528
Other polymers	Propylene	Recycling	0.057904
Other polymers	Propylene	Energy recovery	0.074448
Other polymers	Propylene	Incineration	0
Other polymers	Propylene	Landfill	0.678304
Other polymers	Propylene	Emission to air	0
Other polymers	Propylene	Emission to land	0
Other polymers	Propylene	Emission to water	0
Other polymers	Propylene	Wastewater	0
Other polymers	Propylene	Other	0.016544
Gasoline	Propylene	Exports	0
Gasoline	Propylene	Longer lifetime	0
Gasoline	Propylene	Recycling	0
Gasoline	Propylene	Energy recovery	0.02
Gasoline	Propylene	Incineration	0
Gasoline	Propylene	Landfill	0
Gasoline	Propylene	Emission to air	0
Gasoline	Propylene	Emission to land	0
Gasoline	Propylene	Emission to water	0
Gasoline	Propylene	Wastewater	0
Gasoline	Propylene	Other	0
Solvent	Propylene	Exports	0
Solvent	Propylene	Longer lifetime	0
Solvent	Propylene	Recycling	0.1869
Solvent	Propylene	Energy recovery	0.2225
Solvent	Propylene	Incineration	0.0267
Solvent	Propylene	Landfill	0
Solvent	Propylene	Emission to air	0.0534
Solvent	Propylene	Emission to land	0
Solvent	Propylene	Emission to water	0
Solvent	Propylene	Wastewater	0
Solvent	Propylene	Other	0.4005
Wood laminates	Propylene	Exports	0
Wood laminates	Propylene	Longer lifetime	0.6365
Wood laminates	Propylene	Recycling	0
Wood laminates	Propylene	Energy recovery	0
Wood laminates	Propylene	Incineration	0
Wood laminates	Propylene	Landfill	0.0335
Wood laminates	Propylene	Emission to air	0
Wood laminates	Propylene	Emission to land	0
Wood laminates	Propylene	Emission to water	0
Wood laminates	Propylene	Wastewater	0
Wood laminates	Propylene	Other	0
Water treatment	Propylene	Exports	0
Water treatment	Propylene	Longer lifetime	0
Water treatment	Propylene	Recycling	0
Water treatment	Propylene	Energy recovery	0
Water treatment	Propylene	Incineration	0
Water treatment	Propylene	Landfill	0
Water treatment	Propylene	Emission to air	0
Water treatment	Propylene	Emission to land	0
Water treatment	Propylene	Emission to water	0
Water treatment	Propylene	Wastewater	0.12
Water treatment	Propylene	Other	0
Metals and mining	Propylene	Exports	0
Metals and mining	Propylene	Longer lifetime	0
Metals and mining	Propylene	Recycling	0
Metals and mining	Propylene	Energy recovery	0
Metals and mining	Propylene	Incineration	0
Metals and mining	Propylene	Landfill	0
Metals and mining	Propylene	Emission to air	0
Metals and mining	Propylene	Emission to land	0
Metals and mining	Propylene	Emission to water	0
Metals and mining	Propylene	Wastewater	0.02
Metals and mining	Propylene	Other	0
Cleaning agents	Propylene	Exports	0
Cleaning agents	Propylene	Longer lifetime	0
Cleaning agents	Propylene	Recycling	0
Cleaning agents	Propylene	Energy recovery	0
Cleaning agents	Propylene	Incineration	0
Cleaning agents	Propylene	Landfill	0
Cleaning agents	Propylene	Emission to air	0
Cleaning agents	Propylene	Emission to land	0
Cleaning agents	Propylene	Emission to water	0.0012
Cleaning agents	Propylene	Wastewater	0.0588
Cleaning agents	Propylene	Other	0
Paints	Propylene	Exports	0
Paints	Propylene	Longer lifetime	0.747
Paints	Propylene	Recycling	0.02241
Paints	Propylene	Energy recovery	0
Paints	Propylene	Incineration	0
Paints	Propylene	Landfill	0.06059
Paints	Propylene	Emission to air	0
Paints	Propylene	Emission to land	0
Paints	Propylene	Emission to water	0
Paints	Propylene	Wastewater	0
Paints	Propylene	Other	0
Health care	Propylene	Exports	0
Health care	Propylene	Longer lifetime	0
Health care	Propylene	Recycling	0
Health care	Propylene	Energy recovery	0
Health care	Propylene	Incineration	0
Health care	Propylene	Landfill	0.012
Health care	Propylene	Emission to air	0
Health care	Propylene	Emission to land	0
Health care	Propylene	Emission to water	0.008
Health care	Propylene	Wastewater	0.38
Health care	Propylene	Other	0
Paper and plastic additives	Propylene	Exports	0
Paper and plastic additives	Propylene	Longer lifetime	0
Paper and plastic additives	Propylene	Recycling	0.0696
Paper and plastic additives	Propylene	Energy recovery	0.0319
Paper and plastic additives	Propylene	Incineration	0
Paper and plastic additives	Propylene	Landfill	0.1885
Paper and plastic additives	Propylene	Emission to air	0
Paper and plastic additives	Propylene	Emission to land	0
Paper and plastic additives	Propylene	Emission to water	0
Paper and plastic additives	Propylene	Wastewater	0
Paper and plastic additives	Propylene	Other	0
Adhesives and sealants	Propylene	Exports	0
Adhesives and sealants	Propylene	Longer lifetime	0.423
Adhesives and sealants	Propylene	Recycling	0
Adhesives and sealants	Propylene	Energy recovery	0
Adhesives and sealants	Propylene	Incineration	0
Adhesives and sealants	Propylene	Landfill	0.027
Adhesives and sealants	Propylene	Emission to air	0
Adhesives and sealants	Propylene	Emission to land	0
Adhesives and sealants	Propylene	Emission to water	0
Adhesives and sealants	Propylene	Wastewater	0
Adhesives and sealants	Propylene	Other	0
Other industrial uses	Propylene	Exports	0
Other industrial uses	Propylene	Longer lifetime	0.03
Other industrial uses	Propylene	Recycling	0.009
Other industrial uses	Propylene	Energy recovery	0
Other industrial uses	Propylene	Incineration	0
Other industrial uses	Propylene	Landfill	0.021
Other industrial uses	Propylene	Emission to air	0
Other industrial uses	Propylene	Emission to land	0
Other industrial uses	Propylene	Emission to water	0
Other industrial uses	Propylene	Wastewater	0
Other industrial uses	Propylene	Other	0
Funcitonal fluids	Propylene	Exports	0
Funcitonal fluids	Propylene	Longer lifetime	0
Funcitonal fluids	Propylene	Recycling	0.016
Funcitonal fluids	Propylene	Energy recovery	0.0184
Funcitonal fluids	Propylene	Incineration	0
Funcitonal fluids	Propylene	Landfill	0
Funcitonal fluids	Propylene	Emission to air	0
Funcitonal fluids	Propylene	Emission to land	0
Funcitonal fluids	Propylene	Emission to water	0.0056
Funcitonal fluids	Propylene	Wastewater	0
Funcitonal fluids	Propylene	Other	0
Losses	Propylene	Exports	0
Losses	Propylene	Longer lifetime	0
Losses	Propylene	Recycling	0.1318
Losses	Propylene	Energy recovery	0.4467
Losses	Propylene	Incineration	0.0071
Losses	Propylene	Landfill	0.0455
Losses	Propylene	Emission to air	0.0148
Losses	Propylene	Emission to land	0
Losses	Propylene	Emission to water	0
Losses	Propylene	Wastewater	0.0004
Losses	Propylene	Other	0.6937
Rubbers	Butylenes	Exports	0
Rubbers	Butylenes	Longer lifetime	0.0468
Rubbers	Butylenes	Recycling	0.075
Rubbers	Butylenes	Energy recovery	0.097
Rubbers	Butylenes	Incineration	0
Rubbers	Butylenes	Landfill	0.141
Rubbers	Butylenes	Emission to air	0
Rubbers	Butylenes	Emission to land	0
Rubbers	Butylenes	Emission to water	0
Rubbers	Butylenes	Wastewater	0
Rubbers	Butylenes	Other	0
Gasoline	Butylenes	Exports	0
Gasoline	Butylenes	Longer lifetime	0
Gasoline	Butylenes	Recycling	0
Gasoline	Butylenes	Energy recovery	6.02
Gasoline	Butylenes	Incineration	0
Gasoline	Butylenes	Landfill	0
Gasoline	Butylenes	Emission to air	0
Gasoline	Butylenes	Emission to land	0
Gasoline	Butylenes	Emission to water	0
Gasoline	Butylenes	Wastewater	0
Gasoline	Butylenes	Other	0
Losses	Butylenes	Exports	0
Losses	Butylenes	Longer lifetime	0
Losses	Butylenes	Recycling	0.1128
Losses	Butylenes	Energy recovery	0.1457
Losses	Butylenes	Incineration	0.0235
Losses	Butylenes	Landfill	0
Losses	Butylenes	Emission to air	0.0047
Losses	Butylenes	Emission to land	0
Losses	Butylenes	Emission to water	0
Losses	Butylenes	Wastewater	0
Losses	Butylenes	Other	0.1833
Rubbers	Butadiene	Exports	0
Rubbers	Butadiene	Longer lifetime	0.0455
Rubbers	Butadiene	Recycling	0.07308
Rubbers	Butadiene	Energy recovery	0.094395
Rubbers	Butadiene	Incineration	0
Rubbers	Butadiene	Landfill	0.137025
Rubbers	Butadiene	Emission to air	0
Rubbers	Butadiene	Emission to land	0
Rubbers	Butadiene	Emission to water	0
Rubbers	Butadiene	Wastewater	0
Rubbers	Butadiene	Other	0
Other polymers	Butadiene	Exports	0
Other polymers	Butadiene	Longer lifetime	0.003
Other polymers	Butadiene	Recycling	0.00329
Other polymers	Butadiene	Energy recovery	0.00423
Other polymers	Butadiene	Incineration	0
Other polymers	Butadiene	Landfill	0.03854
Other polymers	Butadiene	Emission to air	0
Other polymers	Butadiene	Emission to land	0
Other polymers	Butadiene	Emission to water	0
Other polymers	Butadiene	Wastewater	0
Other polymers	Butadiene	Other	0.00094
Losses	Butadiene	Exports	0
Losses	Butadiene	Longer lifetime	0
Losses	Butadiene	Recycling	0.027
Losses	Butadiene	Energy recovery	0.004
Losses	Butadiene	Incineration	0
Losses	Butadiene	Landfill	0
Losses	Butadiene	Emission to air	0.0005
Losses	Butadiene	Emission to land	0
Losses	Butadiene	Emission to water	0
Losses	Butadiene	Wastewater	0
Losses	Butadiene	Other	0.0185
Imports	Benzene	PS	0.37
PS	Benzene	Longer lifetime	0.285757
PS	Benzene	Recycling	0.0300045
PS	Benzene	Energy recovery	0.225033
PS	Benzene	Incineration	0
PS	Benzene	Landfill	1.24518
PS	Benzene	Emission to air	0
PS	Benzene	Emission to land	0
PS	Benzene	Emission to water	0
PS	Benzene	Wastewater	0
PS	Benzene	Other	0
PUR	Benzene	Exports	0.33
PUR	Benzene	Longer lifetime	0.2784
PUR	Benzene	Recycling	0.061344
PUR	Benzene	Energy recovery	0.054528
PUR	Benzene	Incineration	0
PUR	Benzene	Landfill	0.531648
PUR	Benzene	Emission to air	0
PUR	Benzene	Emission to land	0
PUR	Benzene	Emission to water	0
PUR	Benzene	Wastewater	0
PUR	Benzene	Other	0.03408
Nylon 6 and 66	Benzene	Exports	0.32
Nylon 6 and 67	Benzene	Longer lifetime	0.0671
Nylon 6 and 68	Benzene	Recycling	0
Nylon 6 and 69	Benzene	Energy recovery	0.043432
Nylon 6 and 70	Benzene	Incineration	0
Nylon 6 and 71	Benzene	Landfill	0.499468
Nylon 6 and 72	Benzene	Emission to air	0
Nylon 6 and 73	Benzene	Emission to land	0
Nylon 6 and 74	Benzene	Emission to water	0
Nylon 6 and 75	Benzene	Wastewater	0
Nylon 6 and 76	Benzene	Other	0
Cleaning agents	Benzene	Exports	0
Cleaning agents	Benzene	Longer lifetime	0
Cleaning agents	Benzene	Recycling	0
Cleaning agents	Benzene	Energy recovery	0
Cleaning agents	Benzene	Incineration	0
Cleaning agents	Benzene	Landfill	0
Cleaning agents	Benzene	Emission to air	0
Cleaning agents	Benzene	Emission to land	0
Cleaning agents	Benzene	Emission to water	0.0032
Cleaning agents	Benzene	Wastewater	0.1568
Cleaning agents	Benzene	Other	0
Losses	Benzene	Exports	0
Losses	Benzene	Longer lifetime	0
Losses	Benzene	Recycling	0.016722
Losses	Benzene	Energy recovery	0.03739
Losses	Benzene	Incineration	0.003596
Losses	Benzene	Landfill	0.011022
Losses	Benzene	Emission to air	0.003486
Losses	Benzene	Emission to land	0
Losses	Benzene	Emission to water	0
Losses	Benzene	Wastewater	0
Losses	Benzene	Other	0.075184
PVC	Xylenes	Exports	0.03
PVC	Xylenes	Longer lifetime	0.0549
PVC	Xylenes	Recycling	0.000351
PVC	Xylenes	Energy recovery	0.004563
PVC	Xylenes	Incineration	0
PVC	Xylenes	Landfill	0.029835
PVC	Xylenes	Emission to air	0
PVC	Xylenes	Emission to land	0
PVC	Xylenes	Emission to water	0
PVC	Xylenes	Wastewater	0
PVC	Xylenes	Other	0.000351
PET	Xylenes	Exports	0.174632
PET	Xylenes	Longer lifetime	0.238829
PET	Xylenes	Recycling	0.439446
PET	Xylenes	Energy recovery	0.35705
PET	Xylenes	Incineration	0
PET	Xylenes	Landfill	1.95004
PET	Xylenes	Emission to air	0
PET	Xylenes	Emission to land	0
PET	Xylenes	Emission to water	0
PET	Xylenes	Wastewater	0
PET	Xylenes	Other	0
Other polymers	Xylenes	Exports	0
Other polymers	Xylenes	Longer lifetime	0.0084
Other polymers	Xylenes	Recycling	0.009212
Other polymers	Xylenes	Energy recovery	0.011844
Other polymers	Xylenes	Incineration	0
Other polymers	Xylenes	Landfill	0.107912
Other polymers	Xylenes	Emission to air	0
Other polymers	Xylenes	Emission to land	0
Other polymers	Xylenes	Emission to water	0
Other polymers	Xylenes	Wastewater	0
Other polymers	Xylenes	Other	0.002632
Gasoline	Xylenes	Exports	0
Gasoline	Xylenes	Longer lifetime	0
Gasoline	Xylenes	Recycling	0
Gasoline	Xylenes	Energy recovery	1.3
Gasoline	Xylenes	Incineration	0
Gasoline	Xylenes	Landfill	0
Gasoline	Xylenes	Emission to air	0
Gasoline	Xylenes	Emission to land	0
Gasoline	Xylenes	Emission to water	0
Gasoline	Xylenes	Wastewater	0
Gasoline	Xylenes	Other	0
Paints	Xylenes	Exports	0
Paints	Xylenes	Longer lifetime	0.036
Paints	Xylenes	Recycling	0.00108
Paints	Xylenes	Energy recovery	0
Paints	Xylenes	Incineration	0
Paints	Xylenes	Landfill	0.00292
Paints	Xylenes	Emission to air	0
Paints	Xylenes	Emission to land	0
Paints	Xylenes	Emission to water	0
Paints	Xylenes	Wastewater	0
Paints	Xylenes	Other	0
Losses	Xylenes	Exports	0
Losses	Xylenes	Longer lifetime	0
Losses	Xylenes	Recycling	0.3318
Losses	Xylenes	Energy recovery	0.2844
Losses	Xylenes	Incineration	0.0237
Losses	Xylenes	Landfill	0
Losses	Xylenes	Emission to air	0.0237
Losses	Xylenes	Emission to land	0
Losses	Xylenes	Emission to water	0
Losses	Xylenes	Wastewater	0
Losses	Xylenes	Other	0.1264
PUR	Toluene	Exports	0.07
PUR	Toluene	Longer lifetime	0.0609
PUR	Toluene	Recycling	0.013419
PUR	Toluene	Energy recovery	0.011928
PUR	Toluene	Incineration	0
PUR	Toluene	Landfill	0.116298
PUR	Toluene	Emission to air	0
PUR	Toluene	Emission to land	0
PUR	Toluene	Emission to water	0
PUR	Toluene	Wastewater	0
PUR	Toluene	Other	0.007455
Gasoline	Toluene	Exports	0
Gasoline	Toluene	Longer lifetime	0
Gasoline	Toluene	Recycling	0
Gasoline	Toluene	Energy recovery	2.56
Gasoline	Toluene	Incineration	0
Gasoline	Toluene	Landfill	0
Gasoline	Toluene	Emission to air	0
Gasoline	Toluene	Emission to land	0
Gasoline	Toluene	Emission to water	0
Gasoline	Toluene	Wastewater	0
Gasoline	Toluene	Other	0
Solvent	Toluene	Exports	0
Solvent	Toluene	Longer lifetime	0
Solvent	Toluene	Recycling	0.1176
Solvent	Toluene	Energy recovery	0.14
Solvent	Toluene	Incineration	0.0168
Solvent	Toluene	Landfill	0
Solvent	Toluene	Emission to air	0.0336
Solvent	Toluene	Emission to land	0
Solvent	Toluene	Emission to water	0
Solvent	Toluene	Wastewater	0
Solvent	Toluene	Other	0.252
Food	Toluene	Exports	0
Food	Toluene	Longer lifetime	0.0138
Food	Toluene	Recycling	0.002666
Food	Toluene	Energy recovery	0.000558
Food	Toluene	Incineration	0
Food	Toluene	Landfill	0.002294
Food	Toluene	Emission to air	0
Food	Toluene	Emission to land	0.00031
Food	Toluene	Emission to water	0
Food	Toluene	Wastewater	0.000186
Food	Toluene	Other	0.000186
Losses	Toluene	Exports	0
Losses	Toluene	Longer lifetime	0
Losses	Toluene	Recycling	0.0414
Losses	Toluene	Energy recovery	0.0078
Losses	Toluene	Incineration	0.0012
Losses	Toluene	Landfill	0
Losses	Toluene	Emission to air	0.0006
Losses	Toluene	Emission to land	0
Losses	Toluene	Emission to water	0
Losses	Toluene	Wastewater	0
Losses	Toluene	Other	0.009
Gasoline	Ethanol	Exports	0
Gasoline	Ethanol	Longer lifetime	0
Gasoline	Ethanol	Recycling	0
Gasoline	Ethanol	Energy recovery	37.88
Gasoline	Ethanol	Incineration	0
Gasoline	Ethanol	Landfill	0
Gasoline	Ethanol	Emission to air	0
Gasoline	Ethanol	Emission to land	0
Gasoline	Ethanol	Emission to water	0
Gasoline	Ethanol	Wastewater	0
Gasoline	Ethanol	Other	0
Solvent	Ethanol	Exports	0
Solvent	Ethanol	Longer lifetime	0
Solvent	Ethanol	Recycling	0.0084
Solvent	Ethanol	Energy recovery	0.01
Solvent	Ethanol	Incineration	0.0012
Solvent	Ethanol	Landfill	0
Solvent	Ethanol	Emission to air	0.0024
Solvent	Ethanol	Emission to land	0
Solvent	Ethanol	Emission to water	0
Solvent	Ethanol	Wastewater	0
Solvent	Ethanol	Other	0.018
Food	Ethanol	Exports	0
Food	Ethanol	Longer lifetime	0.138
Food	Ethanol	Recycling	0.02666
Food	Ethanol	Energy recovery	0.00558
Food	Ethanol	Incineration	0
Food	Ethanol	Landfill	0.02294
Food	Ethanol	Emission to air	0
Food	Ethanol	Emission to land	0.0031
Food	Ethanol	Emission to water	0
Food	Ethanol	Wastewater	0.00186
Food	Ethanol	Other	0.00186
Personal care	Ethanol	Exports	0
Personal care	Ethanol	Longer lifetime	0
Personal care	Ethanol	Recycling	0
Personal care	Ethanol	Energy recovery	0
Personal care	Ethanol	Incineration	0
Personal care	Ethanol	Landfill	0.0054
Personal care	Ethanol	Emission to air	0
Personal care	Ethanol	Emission to land	0
Personal care	Ethanol	Emission to water	0.0018
Personal care	Ethanol	Wastewater	0.0828
Personal care	Ethanol	Other	0
Health care	Ethanol	Exports	0
Health care	Ethanol	Longer lifetime	0
Health care	Ethanol	Recycling	0
Health care	Ethanol	Energy recovery	0
Health care	Ethanol	Incineration	0
Health care	Ethanol	Landfill	0.0048
Health care	Ethanol	Emission to air	0
Health care	Ethanol	Emission to land	0
Health care	Ethanol	Emission to water	0.0032
Health care	Ethanol	Wastewater	0.152
Health care	Ethanol	Other	0
Paper and plastic additives	Ethanol	Exports	0
Paper and plastic additives	Ethanol	Longer lifetime	0
Paper and plastic additives	Ethanol	Recycling	0.0096
Paper and plastic additives	Ethanol	Energy recovery	0.0044
Paper and plastic additives	Ethanol	Incineration	0
Paper and plastic additives	Ethanol	Landfill	0.026
Paper and plastic additives	Ethanol	Emission to air	0
Paper and plastic additives	Ethanol	Emission to land	0
Paper and plastic additives	Ethanol	Emission to water	0
Paper and plastic additives	Ethanol	Wastewater	0
Paper and plastic additives	Ethanol	Other	0
Rubbers	Methanol	Exports	0
Rubbers	Methanol	Longer lifetime	0.026
Rubbers	Methanol	Recycling	0.04176
Rubbers	Methanol	Energy recovery	0.05394
Rubbers	Methanol	Incineration	0
Rubbers	Methanol	Landfill	0.0783
Rubbers	Methanol	Emission to air	0
Rubbers	Methanol	Emission to land	0
Rubbers	Methanol	Emission to water	0
Rubbers	Methanol	Wastewater	0
Rubbers	Methanol	Other	0
Imports	Methanol	PS	0.01
PS	Methanol	Longer lifetime	0.00402474
PS	Methanol	Recycling	0.000422598
PS	Methanol	Energy recovery	0.00316948
PS	Methanol	Incineration	0
PS	Methanol	Landfill	0.0175378
PS	Methanol	Emission to air	0
PS	Methanol	Emission to land	0
PS	Methanol	Emission to water	0
PS	Methanol	Wastewater	0
PS	Methanol	Other	0
PUR	Methanol	Exports	0.01
PUR	Methanol	Longer lifetime	0.0116
PUR	Methanol	Recycling	0.002556
PUR	Methanol	Energy recovery	0.002272
PUR	Methanol	Incineration	0
PUR	Methanol	Landfill	0.022152
PUR	Methanol	Emission to air	0
PUR	Methanol	Emission to land	0
PUR	Methanol	Emission to water	0
PUR	Methanol	Wastewater	0
PUR	Methanol	Other	0.00142
Other polymers	Methanol	Exports	0
Other polymers	Methanol	Longer lifetime	0.0138
Other polymers	Methanol	Recycling	0.015134
Other polymers	Methanol	Energy recovery	0.019458
Other polymers	Methanol	Incineration	0
Other polymers	Methanol	Landfill	0.177284
Other polymers	Methanol	Emission to air	0
Other polymers	Methanol	Emission to land	0
Other polymers	Methanol	Emission to water	0
Other polymers	Methanol	Wastewater	0
Other polymers	Methanol	Other	0.004324
Gasoline	Methanol	Exports	0
Gasoline	Methanol	Longer lifetime	0
Gasoline	Methanol	Recycling	0
Gasoline	Methanol	Energy recovery	0.63
Gasoline	Methanol	Incineration	0
Gasoline	Methanol	Landfill	0
Gasoline	Methanol	Emission to air	0
Gasoline	Methanol	Emission to land	0
Gasoline	Methanol	Emission to water	0
Gasoline	Methanol	Wastewater	0
Gasoline	Methanol	Other	0
Solvent	Methanol	Exports	0
Solvent	Methanol	Longer lifetime	0
Solvent	Methanol	Recycling	0.1058
Solvent	Methanol	Energy recovery	0.092
Solvent	Methanol	Incineration	0.0092
Solvent	Methanol	Landfill	0.0046
Solvent	Methanol	Emission to air	0.023
Solvent	Methanol	Emission to land	0
Solvent	Methanol	Emission to water	0
Solvent	Methanol	Wastewater	0
Solvent	Methanol	Other	0.2254
Animal feed	Methanol	Exports	0
Animal feed	Methanol	Longer lifetime	0.0075
Animal feed	Methanol	Recycling	0.01125
Animal feed	Methanol	Energy recovery	0
Animal feed	Methanol	Incineration	0
Animal feed	Methanol	Landfill	0
Animal feed	Methanol	Emission to air	0
Animal feed	Methanol	Emission to land	0.01125
Animal feed	Methanol	Emission to water	0
Animal feed	Methanol	Wastewater	0
Animal feed	Methanol	Other	0
Cigarettes	Methanol	Exports	0
Cigarettes	Methanol	Longer lifetime	0
Cigarettes	Methanol	Recycling	0
Cigarettes	Methanol	Energy recovery	0
Cigarettes	Methanol	Incineration	0
Cigarettes	Methanol	Landfill	0.135
Cigarettes	Methanol	Emission to air	0
Cigarettes	Methanol	Emission to land	0.405
Cigarettes	Methanol	Emission to water	0
Cigarettes	Methanol	Wastewater	0
Cigarettes	Methanol	Other	0
Wood laminates	Methanol	Exports	0
Wood laminates	Methanol	Longer lifetime	0.7505
Wood laminates	Methanol	Recycling	0
Wood laminates	Methanol	Energy recovery	0
Wood laminates	Methanol	Incineration	0
Wood laminates	Methanol	Landfill	0.0395
Wood laminates	Methanol	Emission to air	0
Wood laminates	Methanol	Emission to land	0
Wood laminates	Methanol	Emission to water	0
Wood laminates	Methanol	Wastewater	0
Wood laminates	Methanol	Other	0
Water treatment	Methanol	Exports	0
Water treatment	Methanol	Longer lifetime	0
Water treatment	Methanol	Recycling	0
Water treatment	Methanol	Energy recovery	0
Water treatment	Methanol	Incineration	0
Water treatment	Methanol	Landfill	0
Water treatment	Methanol	Emission to air	0
Water treatment	Methanol	Emission to land	0
Water treatment	Methanol	Emission to water	0
Water treatment	Methanol	Wastewater	0.04
Water treatment	Methanol	Other	0
Cleaning agents	Methanol	Exports	0
Cleaning agents	Methanol	Longer lifetime	0
Cleaning agents	Methanol	Recycling	0
Cleaning agents	Methanol	Energy recovery	0
Cleaning agents	Methanol	Incineration	0
Cleaning agents	Methanol	Landfill	0
Cleaning agents	Methanol	Emission to air	0
Cleaning agents	Methanol	Emission to land	0
Cleaning agents	Methanol	Emission to water	0.002
Cleaning agents	Methanol	Wastewater	0.098
Cleaning agents	Methanol	Other	0
Paints	Methanol	Exports	0
Paints	Methanol	Longer lifetime	0.045
Paints	Methanol	Recycling	0.00135
Paints	Methanol	Energy recovery	0
Paints	Methanol	Incineration	0
Paints	Methanol	Landfill	0.00365
Paints	Methanol	Emission to air	0
Paints	Methanol	Emission to land	0
Paints	Methanol	Emission to water	0
Paints	Methanol	Wastewater	0
Paints	Methanol	Other	0
Personal care	Methanol	Exports	0
Personal care	Methanol	Longer lifetime	0
Personal care	Methanol	Recycling	0
Personal care	Methanol	Energy recovery	0
Personal care	Methanol	Incineration	0
Personal care	Methanol	Landfill	0.003
Personal care	Methanol	Emission to air	0
Personal care	Methanol	Emission to land	0
Personal care	Methanol	Emission to water	0.001
Personal care	Methanol	Wastewater	0.046
Personal care	Methanol	Other	0
Pulp and paper treatment	Methanol	Exports	0
Pulp and paper treatment	Methanol	Longer lifetime	0
Pulp and paper treatment	Methanol	Recycling	0
Pulp and paper treatment	Methanol	Energy recovery	0
Pulp and paper treatment	Methanol	Incineration	0
Pulp and paper treatment	Methanol	Landfill	0
Pulp and paper treatment	Methanol	Emission to air	0
Pulp and paper treatment	Methanol	Emission to land	0
Pulp and paper treatment	Methanol	Emission to water	0
Pulp and paper treatment	Methanol	Wastewater	0.02
Pulp and paper treatment	Methanol	Other	0
Health care	Methanol	Exports	0
Health care	Methanol	Longer lifetime	0
Health care	Methanol	Recycling	0
Health care	Methanol	Energy recovery	0
Health care	Methanol	Incineration	0
Health care	Methanol	Landfill	0.0021
Health care	Methanol	Emission to air	0
Health care	Methanol	Emission to land	0
Health care	Methanol	Emission to water	0.0014
Health care	Methanol	Wastewater	0.0665
Health care	Methanol	Other	0
Paper and plastic additives	Methanol	Exports	0
Paper and plastic additives	Methanol	Longer lifetime	0
Paper and plastic additives	Methanol	Recycling	0.0024
Paper and plastic additives	Methanol	Energy recovery	0.0011
Paper and plastic additives	Methanol	Incineration	0
Paper and plastic additives	Methanol	Landfill	0.0065
Paper and plastic additives	Methanol	Emission to air	0
Paper and plastic additives	Methanol	Emission to land	0
Paper and plastic additives	Methanol	Emission to water	0
Paper and plastic additives	Methanol	Wastewater	0
Paper and plastic additives	Methanol	Other	0
Adhesives and sealants	Methanol	Exports	0
Adhesives and sealants	Methanol	Longer lifetime	0.0282
Adhesives and sealants	Methanol	Recycling	0
Adhesives and sealants	Methanol	Energy recovery	0
Adhesives and sealants	Methanol	Incineration	0
Adhesives and sealants	Methanol	Landfill	0.0018
Adhesives and sealants	Methanol	Emission to air	0
Adhesives and sealants	Methanol	Emission to land	0
Adhesives and sealants	Methanol	Emission to water	0
Adhesives and sealants	Methanol	Wastewater	0
Adhesives and sealants	Methanol	Other	0
Other industrial use	Methanol	Exports	0
Other industrial use	Methanol	Longer lifetime	0.01
Other industrial use	Methanol	Recycling	0.003
Other industrial use	Methanol	Energy recovery	0
Other industrial use	Methanol	Incineration	0
Other industrial use	Methanol	Landfill	0.007
Other industrial use	Methanol	Emission to air	0
Other industrial use	Methanol	Emission to land	0
Other industrial use	Methanol	Emission to water	0
Other industrial use	Methanol	Wastewater	0
Other industrial use	Methanol	Other	0
Functional fluids	Methanol	Exports	0
Functional fluids	Methanol	Longer lifetime	0
Functional fluids	Methanol	Recycling	0.04
Functional fluids	Methanol	Energy recovery	0.046
Functional fluids	Methanol	Incineration	0
Functional fluids	Methanol	Landfill	0
Functional fluids	Methanol	Emission to air	0
Functional fluids	Methanol	Emission to land	0
Functional fluids	Methanol	Emission to water	0.014
Functional fluids	Methanol	Wastewater	0
Functional fluids	Methanol	Other	0
Losses	Methanol	Exports	0
Losses	Methanol	Longer lifetime	0
Losses	Methanol	Recycling	0.1441
Losses	Methanol	Energy recovery	0.133
Losses	Methanol	Incineration	0.012
Losses	Methanol	Landfill	0.0113
Losses	Methanol	Emission to air	0.0312
Losses	Methanol	Emission to land	0
Losses	Methanol	Emission to water	0
Losses	Methanol	Wastewater	0.0073
Losses	Methanol	Other	0.5111
Food	Sulfuric acid	Exports	0
Food	Sulfuric acid	Longer lifetime	0.7383
Food	Sulfuric acid	Recycling	0.142631
Food	Sulfuric acid	Energy recovery	0.029853
Food	Sulfuric acid	Incineration	0
Food	Sulfuric acid	Landfill	0.122729
Food	Sulfuric acid	Emission to air	0
Food	Sulfuric acid	Emission to land	0.016585
Food	Sulfuric acid	Emission to water	0
Food	Sulfuric acid	Wastewater	0.009951
Food	Sulfuric acid	Other	0.009951
Other crops	Sulfuric acid	Exports	0
Other crops	Sulfuric acid	Longer lifetime	3.09
Other crops	Sulfuric acid	Recycling	0
Other crops	Sulfuric acid	Energy recovery	0
Other crops	Sulfuric acid	Incineration	0
Other crops	Sulfuric acid	Landfill	0
Other crops	Sulfuric acid	Emission to air	0
Other crops	Sulfuric acid	Emission to land	0
Other crops	Sulfuric acid	Emission to water	0
Other crops	Sulfuric acid	Wastewater	0
Other crops	Sulfuric acid	Other	0
Animal feed	Sulfuric acid	Exports	0
Animal feed	Sulfuric acid	Longer lifetime	0.42
Animal feed	Sulfuric acid	Recycling	0.63
Animal feed	Sulfuric acid	Energy recovery	0
Animal feed	Sulfuric acid	Incineration	0
Animal feed	Sulfuric acid	Landfill	0
Animal feed	Sulfuric acid	Emission to air	0
Animal feed	Sulfuric acid	Emission to land	0.63
Animal feed	Sulfuric acid	Emission to water	0
Animal feed	Sulfuric acid	Wastewater	0
Animal feed	Sulfuric acid	Other	0
Lead acid batteries	Sulfuric acid	Exports	0
Lead acid batteries	Sulfuric acid	Longer lifetime	0.272
Lead acid batteries	Sulfuric acid	Recycling	0
Lead acid batteries	Sulfuric acid	Energy recovery	0
Lead acid batteries	Sulfuric acid	Incineration	0
Lead acid batteries	Sulfuric acid	Landfill	0
Lead acid batteries	Sulfuric acid	Emission to air	0
Lead acid batteries	Sulfuric acid	Emission to land	0
Lead acid batteries	Sulfuric acid	Emission to water	0
Lead acid batteries	Sulfuric acid	Wastewater	0.068
Lead acid batteries	Sulfuric acid	Other	0
Cigarettes	Sulfuric acid	Exports	0
Cigarettes	Sulfuric acid	Longer lifetime	0
Cigarettes	Sulfuric acid	Recycling	0
Cigarettes	Sulfuric acid	Energy recovery	0
Cigarettes	Sulfuric acid	Incineration	0
Cigarettes	Sulfuric acid	Landfill	0.0075
Cigarettes	Sulfuric acid	Emission to air	0
Cigarettes	Sulfuric acid	Emission to land	0.0225
Cigarettes	Sulfuric acid	Emission to water	0
Cigarettes	Sulfuric acid	Wastewater	0
Cigarettes	Sulfuric acid	Other	0
Metals and mining	Sulfuric acid	Exports	0
Metals and mining	Sulfuric acid	Longer lifetime	0
Metals and mining	Sulfuric acid	Recycling	0
Metals and mining	Sulfuric acid	Energy recovery	0
Metals and mining	Sulfuric acid	Incineration	0
Metals and mining	Sulfuric acid	Landfill	0
Metals and mining	Sulfuric acid	Emission to air	0
Metals and mining	Sulfuric acid	Emission to land	0
Metals and mining	Sulfuric acid	Emission to water	0
Metals and mining	Sulfuric acid	Wastewater	2.2
Metals and mining	Sulfuric acid	Other	0
Cleaning agents	Sulfuric acid	Exports	0
Cleaning agents	Sulfuric acid	Longer lifetime	0
Cleaning agents	Sulfuric acid	Recycling	0
Cleaning agents	Sulfuric acid	Energy recovery	0
Cleaning agents	Sulfuric acid	Incineration	0
Cleaning agents	Sulfuric acid	Landfill	0
Cleaning agents	Sulfuric acid	Emission to air	0
Cleaning agents	Sulfuric acid	Emission to land	0
Cleaning agents	Sulfuric acid	Emission to water	0.0016
Cleaning agents	Sulfuric acid	Wastewater	0.0784
Cleaning agents	Sulfuric acid	Other	0
Pulp and paper treatment	Sulfuric acid	Exports	0
Pulp and paper treatment	Sulfuric acid	Longer lifetime	0
Pulp and paper treatment	Sulfuric acid	Recycling	0
Pulp and paper treatment	Sulfuric acid	Energy recovery	0
Pulp and paper treatment	Sulfuric acid	Incineration	0
Pulp and paper treatment	Sulfuric acid	Landfill	0
Pulp and paper treatment	Sulfuric acid	Emission to air	0
Pulp and paper treatment	Sulfuric acid	Emission to land	0
Pulp and paper treatment	Sulfuric acid	Emission to water	0
Pulp and paper treatment	Sulfuric acid	Wastewater	0.34
Pulp and paper treatment	Sulfuric acid	Other	0
Health care	Sulfuric acid	Exports	0
Health care	Sulfuric acid	Longer lifetime	0
Health care	Sulfuric acid	Recycling	0
Health care	Sulfuric acid	Energy recovery	0
Health care	Sulfuric acid	Incineration	0
Health care	Sulfuric acid	Landfill	0.0018
Health care	Sulfuric acid	Emission to air	0
Health care	Sulfuric acid	Emission to land	0
Health care	Sulfuric acid	Emission to water	0.0012
Health care	Sulfuric acid	Wastewater	0.057
Health care	Sulfuric acid	Other	0
Functional fluids	Sulfuric acid	Exports	0
Functional fluids	Sulfuric acid	Longer lifetime	0
Functional fluids	Sulfuric acid	Recycling	0.04
Functional fluids	Sulfuric acid	Energy recovery	0.046
Functional fluids	Sulfuric acid	Incineration	0
Functional fluids	Sulfuric acid	Landfill	0
Functional fluids	Sulfuric acid	Emission to air	0
Functional fluids	Sulfuric acid	Emission to land	0
Functional fluids	Sulfuric acid	Emission to water	0.014
Functional fluids	Sulfuric acid	Wastewater	0
Functional fluids	Sulfuric acid	Other	0
Losses	Sulfuric acid	Exports	0
Losses	Sulfuric acid	Longer lifetime	0
Losses	Sulfuric acid	Recycling	6.372
Losses	Sulfuric acid	Energy recovery	0
Losses	Sulfuric acid	Incineration	0
Losses	Sulfuric acid	Landfill	0
Losses	Sulfuric acid	Emission to air	0.0708
Losses	Sulfuric acid	Emission to land	0
Losses	Sulfuric acid	Emission to water	0
Losses	Sulfuric acid	Wastewater	0
Losses	Sulfuric acid	Other	1.3372
Explosives	Ammonia	Exports	0
Explosives	Ammonia	Longer lifetime	0
Explosives	Ammonia	Recycling	0
Explosives	Ammonia	Energy recovery	0
Explosives	Ammonia	Incineration	0
Explosives	Ammonia	Landfill	0
Explosives	Ammonia	Emission to air	2.21
Explosives	Ammonia	Emission to land	0
Explosives	Ammonia	Emission to water	0
Explosives	Ammonia	Wastewater	0
Explosives	Ammonia	Other	0
Food	Ammonia	Exports	0
Food	Ammonia	Longer lifetime	1.3869
Food	Ammonia	Recycling	0.267933
Food	Ammonia	Energy recovery	0.056079
Food	Ammonia	Incineration	0
Food	Ammonia	Landfill	0.230547
Food	Ammonia	Emission to air	0
Food	Ammonia	Emission to land	0.031155
Food	Ammonia	Emission to water	0
Food	Ammonia	Wastewater	0.018693
Food	Ammonia	Other	0.018693
Other crops	Ammonia	Exports	0
Other crops	Ammonia	Longer lifetime	5.84
Other crops	Ammonia	Recycling	0
Other crops	Ammonia	Energy recovery	0
Other crops	Ammonia	Incineration	0
Other crops	Ammonia	Landfill	0
Other crops	Ammonia	Emission to air	0
Other crops	Ammonia	Emission to land	0
Other crops	Ammonia	Emission to water	0
Other crops	Ammonia	Wastewater	0
Other crops	Ammonia	Other	0
Animal feed	Ammonia	Exports	0
Animal feed	Ammonia	Longer lifetime	0.81
Animal feed	Ammonia	Recycling	1.215
Animal feed	Ammonia	Energy recovery	0
Animal feed	Ammonia	Incineration	0
Animal feed	Ammonia	Landfill	0
Animal feed	Ammonia	Emission to air	0
Animal feed	Ammonia	Emission to land	1.215
Animal feed	Ammonia	Emission to water	0
Animal feed	Ammonia	Wastewater	0
Animal feed	Ammonia	Other	0
Wood laminates	Ammonia	Exports	0
Wood laminates	Ammonia	Longer lifetime	0.627
Wood laminates	Ammonia	Recycling	0
Wood laminates	Ammonia	Energy recovery	0
Wood laminates	Ammonia	Incineration	0
Wood laminates	Ammonia	Landfill	0.033
Wood laminates	Ammonia	Emission to air	0
Wood laminates	Ammonia	Emission to land	0
Wood laminates	Ammonia	Emission to water	0
Wood laminates	Ammonia	Wastewater	0
Wood laminates	Ammonia	Other	0
Metals and mining	Ammonia	Exports	0
Metals and mining	Ammonia	Longer lifetime	0
Metals and mining	Ammonia	Recycling	0
Metals and mining	Ammonia	Energy recovery	0
Metals and mining	Ammonia	Incineration	0
Metals and mining	Ammonia	Landfill	0
Metals and mining	Ammonia	Emission to air	0
Metals and mining	Ammonia	Emission to land	0
Metals and mining	Ammonia	Emission to water	0
Metals and mining	Ammonia	Wastewater	0.09
Metals and mining	Ammonia	Other	0
Paints	Ammonia	Exports	0
Paints	Ammonia	Longer lifetime	0.018
Paints	Ammonia	Recycling	0.00054
Paints	Ammonia	Energy recovery	0
Paints	Ammonia	Incineration	0
Paints	Ammonia	Landfill	0.00146
Paints	Ammonia	Emission to air	0
Paints	Ammonia	Emission to land	0
Paints	Ammonia	Emission to water	0
Paints	Ammonia	Wastewater	0
Paints	Ammonia	Other	0
Adhesives and sealants	Ammonia	Exports	0
Adhesives and sealants	Ammonia	Longer lifetime	0.0094
Adhesives and sealants	Ammonia	Recycling	0
Adhesives and sealants	Ammonia	Energy recovery	0
Adhesives and sealants	Ammonia	Incineration	0
Adhesives and sealants	Ammonia	Landfill	0.0006
Adhesives and sealants	Ammonia	Emission to air	0
Adhesives and sealants	Ammonia	Emission to land	0
Adhesives and sealants	Ammonia	Emission to water	0
Adhesives and sealants	Ammonia	Wastewater	0
Adhesives and sealants	Ammonia	Other	0
Losses	Ammonia	Exports	0
Losses	Ammonia	Longer lifetime	0
Losses	Ammonia	Recycling	0.5194
Losses	Ammonia	Energy recovery	0.1416
Losses	Ammonia	Incineration	0
Losses	Ammonia	Landfill	0.0548
Losses	Ammonia	Emission to air	0.1534
Losses	Ammonia	Emission to land	0
Losses	Ammonia	Emission to water	0
Losses	Ammonia	Wastewater	0.0097
Losses	Ammonia	Other	1.4911
PC	Sodium hydroxide	Exports	0.151508
PC	Sodium hydroxide	Longer lifetime	0.0164833
PC	Sodium hydroxide	Recycling	0.00558079
PC	Sodium hydroxide	Energy recovery	0.00558079
PC	Sodium hydroxide	Incineration	0
PC	Sodium hydroxide	Landfill	0.0508472
PC	Sodium hydroxide	Emission to air	0
PC	Sodium hydroxide	Emission to land	0
PC	Sodium hydroxide	Emission to water	0
PC	Sodium hydroxide	Wastewater	0
PC	Sodium hydroxide	Other	0
Water treatment	Sodium hydroxide	Exports	0
Water treatment	Sodium hydroxide	Longer lifetime	0
Water treatment	Sodium hydroxide	Recycling	0
Water treatment	Sodium hydroxide	Energy recovery	0
Water treatment	Sodium hydroxide	Incineration	0
Water treatment	Sodium hydroxide	Landfill	0
Water treatment	Sodium hydroxide	Emission to air	0
Water treatment	Sodium hydroxide	Emission to land	0
Water treatment	Sodium hydroxide	Emission to water	0
Water treatment	Sodium hydroxide	Wastewater	1.29
Water treatment	Sodium hydroxide	Other	0
Metals and mining	Sodium hydroxide	Exports	0
Metals and mining	Sodium hydroxide	Longer lifetime	0
Metals and mining	Sodium hydroxide	Recycling	0
Metals and mining	Sodium hydroxide	Energy recovery	0
Metals and mining	Sodium hydroxide	Incineration	0
Metals and mining	Sodium hydroxide	Landfill	0
Metals and mining	Sodium hydroxide	Emission to air	0
Metals and mining	Sodium hydroxide	Emission to land	0
Metals and mining	Sodium hydroxide	Emission to water	0
Metals and mining	Sodium hydroxide	Wastewater	0.11
Metals and mining	Sodium hydroxide	Other	0
Cleaning agents	Sodium hydroxide	Exports	0
Cleaning agents	Sodium hydroxide	Longer lifetime	0
Cleaning agents	Sodium hydroxide	Recycling	0
Cleaning agents	Sodium hydroxide	Energy recovery	0
Cleaning agents	Sodium hydroxide	Incineration	0
Cleaning agents	Sodium hydroxide	Landfill	0
Cleaning agents	Sodium hydroxide	Emission to air	0
Cleaning agents	Sodium hydroxide	Emission to land	0
Cleaning agents	Sodium hydroxide	Emission to water	0.0202
Cleaning agents	Sodium hydroxide	Wastewater	0.9898
Cleaning agents	Sodium hydroxide	Other	0
Personal care	Sodium hydroxide	Exports	0
Personal care	Sodium hydroxide	Longer lifetime	0
Personal care	Sodium hydroxide	Recycling	0
Personal care	Sodium hydroxide	Energy recovery	0
Personal care	Sodium hydroxide	Incineration	0
Personal care	Sodium hydroxide	Landfill	0.0024
Personal care	Sodium hydroxide	Emission to air	0
Personal care	Sodium hydroxide	Emission to land	0
Personal care	Sodium hydroxide	Emission to water	0.0008
Personal care	Sodium hydroxide	Wastewater	0.0368
Personal care	Sodium hydroxide	Other	0
Pulp and paper treatment	Sodium hydroxide	Exports	0
Pulp and paper treatment	Sodium hydroxide	Longer lifetime	0
Pulp and paper treatment	Sodium hydroxide	Recycling	0
Pulp and paper treatment	Sodium hydroxide	Energy recovery	0
Pulp and paper treatment	Sodium hydroxide	Incineration	0
Pulp and paper treatment	Sodium hydroxide	Landfill	0
Pulp and paper treatment	Sodium hydroxide	Emission to air	0
Pulp and paper treatment	Sodium hydroxide	Emission to land	0
Pulp and paper treatment	Sodium hydroxide	Emission to water	0
Pulp and paper treatment	Sodium hydroxide	Wastewater	2.18
Pulp and paper treatment	Sodium hydroxide	Other	0
Other industrial use	Sodium hydroxide	Exports	0
Other industrial use	Sodium hydroxide	Longer lifetime	0.255
Other industrial use	Sodium hydroxide	Recycling	0.0765
Other industrial use	Sodium hydroxide	Energy recovery	0
Other industrial use	Sodium hydroxide	Incineration	0
Other industrial use	Sodium hydroxide	Landfill	0.1785
Other industrial use	Sodium hydroxide	Emission to air	0
Other industrial use	Sodium hydroxide	Emission to land	0
Other industrial use	Sodium hydroxide	Emission to water	0
Other industrial use	Sodium hydroxide	Wastewater	0
Other industrial use	Sodium hydroxide	Other	0
Aluminum metal	Sodium hydroxide	Exports	0.0427924
Aluminum metal	Sodium hydroxide	Longer lifetime	0.222209
Aluminum metal	Sodium hydroxide	Recycling	0.23205
Aluminum metal	Sodium hydroxide	Energy recovery	0.20475
Aluminum metal	Sodium hydroxide	Incineration	0
Aluminum metal	Sodium hydroxide	Landfill	0.928199
Aluminum metal	Sodium hydroxide	Emission to air	0
Aluminum metal	Sodium hydroxide	Emission to land	0
Aluminum metal	Sodium hydroxide	Emission to water	0
Aluminum metal	Sodium hydroxide	Wastewater	0
Aluminum metal	Sodium hydroxide	Other	0
Glass	Sodium carbonate	Exports	0
Glass	Sodium carbonate	Longer lifetime	0.924
Glass	Sodium carbonate	Recycling	0.39468
Glass	Sodium carbonate	Energy recovery	0.22308
Glass	Sodium carbonate	Incineration	0
Glass	Sodium carbonate	Landfill	1.09824
Glass	Sodium carbonate	Emission to air	0
Glass	Sodium carbonate	Emission to land	0
Glass	Sodium carbonate	Emission to water	0
Glass	Sodium carbonate	Wastewater	0
Glass	Sodium carbonate	Other	0
Food	Sodium carbonate	Exports	0
Food	Sodium carbonate	Longer lifetime	0.1035
Food	Sodium carbonate	Recycling	0.019995
Food	Sodium carbonate	Energy recovery	0.004185
Food	Sodium carbonate	Incineration	0
Food	Sodium carbonate	Landfill	0.017205
Food	Sodium carbonate	Emission to air	0
Food	Sodium carbonate	Emission to land	0.002325
Food	Sodium carbonate	Emission to water	0
Food	Sodium carbonate	Wastewater	0.001395
Food	Sodium carbonate	Other	0.001395
Animal feed	Sodium carbonate	Exports	0
Animal feed	Sodium carbonate	Longer lifetime	0.0625
Animal feed	Sodium carbonate	Recycling	0.09375
Animal feed	Sodium carbonate	Energy recovery	0
Animal feed	Sodium carbonate	Incineration	0
Animal feed	Sodium carbonate	Landfill	0
Animal feed	Sodium carbonate	Emission to air	0
Animal feed	Sodium carbonate	Emission to land	0.09375
Animal feed	Sodium carbonate	Emission to water	0
Animal feed	Sodium carbonate	Wastewater	0
Animal feed	Sodium carbonate	Other	0
Lead acid batteries	Sodium carbonate	Exports	0
Lead acid batteries	Sodium carbonate	Longer lifetime	0.008
Lead acid batteries	Sodium carbonate	Recycling	0
Lead acid batteries	Sodium carbonate	Energy recovery	0
Lead acid batteries	Sodium carbonate	Incineration	0
Lead acid batteries	Sodium carbonate	Landfill	0
Lead acid batteries	Sodium carbonate	Emission to air	0
Lead acid batteries	Sodium carbonate	Emission to land	0
Lead acid batteries	Sodium carbonate	Emission to water	0
Lead acid batteries	Sodium carbonate	Wastewater	0.002
Lead acid batteries	Sodium carbonate	Other	0
Water treatment	Sodium carbonate	Exports	0
Water treatment	Sodium carbonate	Longer lifetime	0
Water treatment	Sodium carbonate	Recycling	0
Water treatment	Sodium carbonate	Energy recovery	0
Water treatment	Sodium carbonate	Incineration	0
Water treatment	Sodium carbonate	Landfill	0
Water treatment	Sodium carbonate	Emission to air	0
Water treatment	Sodium carbonate	Emission to land	0
Water treatment	Sodium carbonate	Emission to water	0
Water treatment	Sodium carbonate	Wastewater	0.05
Water treatment	Sodium carbonate	Other	0
Cleaning agents	Sodium carbonate	Exports	0
Cleaning agents	Sodium carbonate	Longer lifetime	0
Cleaning agents	Sodium carbonate	Recycling	0
Cleaning agents	Sodium carbonate	Energy recovery	0
Cleaning agents	Sodium carbonate	Incineration	0
Cleaning agents	Sodium carbonate	Landfill	0
Cleaning agents	Sodium carbonate	Emission to air	0
Cleaning agents	Sodium carbonate	Emission to land	0
Cleaning agents	Sodium carbonate	Emission to water	0.0138
Cleaning agents	Sodium carbonate	Wastewater	0.6762
Cleaning agents	Sodium carbonate	Other	0
Paints	Sodium carbonate	Exports	0
Paints	Sodium carbonate	Longer lifetime	0.036
Paints	Sodium carbonate	Recycling	0.00108
Paints	Sodium carbonate	Energy recovery	0
Paints	Sodium carbonate	Incineration	0
Paints	Sodium carbonate	Landfill	0.00292
Paints	Sodium carbonate	Emission to air	0
Paints	Sodium carbonate	Emission to land	0
Paints	Sodium carbonate	Emission to water	0
Paints	Sodium carbonate	Wastewater	0
Paints	Sodium carbonate	Other	0
Personal care	Sodium carbonate	Exports	0
Personal care	Sodium carbonate	Longer lifetime	0
Personal care	Sodium carbonate	Recycling	0
Personal care	Sodium carbonate	Energy recovery	0
Personal care	Sodium carbonate	Incineration	0
Personal care	Sodium carbonate	Landfill	0.0012
Personal care	Sodium carbonate	Emission to air	0
Personal care	Sodium carbonate	Emission to land	0
Personal care	Sodium carbonate	Emission to water	0.0004
Personal care	Sodium carbonate	Wastewater	0.0184
Personal care	Sodium carbonate	Other	0
Pulp and paper treatment	Sodium carbonate	Exports	0
Pulp and paper treatment	Sodium carbonate	Longer lifetime	0
Pulp and paper treatment	Sodium carbonate	Recycling	0
Pulp and paper treatment	Sodium carbonate	Energy recovery	0
Pulp and paper treatment	Sodium carbonate	Incineration	0
Pulp and paper treatment	Sodium carbonate	Landfill	0
Pulp and paper treatment	Sodium carbonate	Emission to air	0
Pulp and paper treatment	Sodium carbonate	Emission to land	0
Pulp and paper treatment	Sodium carbonate	Emission to water	0
Pulp and paper treatment	Sodium carbonate	Wastewater	0.12
Pulp and paper treatment	Sodium carbonate	Other	0
Health care	Sodium carbonate	Exports	0
Health care	Sodium carbonate	Longer lifetime	0
Health care	Sodium carbonate	Recycling	0
Health care	Sodium carbonate	Energy recovery	0
Health care	Sodium carbonate	Incineration	0
Health care	Sodium carbonate	Landfill	0.0036
Health care	Sodium carbonate	Emission to air	0
Health care	Sodium carbonate	Emission to land	0
Health care	Sodium carbonate	Emission to water	0.0024
Health care	Sodium carbonate	Wastewater	0.114
Health care	Sodium carbonate	Other	0
Other industrial use	Sodium carbonate	Exports	0
Other industrial use	Sodium carbonate	Longer lifetime	0.135
Other industrial use	Sodium carbonate	Recycling	0.0405
Other industrial use	Sodium carbonate	Energy recovery	0
Other industrial use	Sodium carbonate	Incineration	0
Other industrial use	Sodium carbonate	Landfill	0.0945
Other industrial use	Sodium carbonate	Emission to air	0
Other industrial use	Sodium carbonate	Emission to land	0
Other industrial use	Sodium carbonate	Emission to water	0
Other industrial use	Sodium carbonate	Wastewater	0
Other industrial use	Sodium carbonate	Other	0
Losses	Sodium carbonate	Exports	0
Losses	Sodium carbonate	Longer lifetime	0
Losses	Sodium carbonate	Recycling	0
Losses	Sodium carbonate	Energy recovery	0
Losses	Sodium carbonate	Incineration	0
Losses	Sodium carbonate	Landfill	0
Losses	Sodium carbonate	Emission to air	0
Losses	Sodium carbonate	Emission to land	0
Losses	Sodium carbonate	Emission to water	0
Losses	Sodium carbonate	Wastewater	0
Losses	Sodium carbonate	Other	0.36
PVC	Chlorine	Exports	1.1
PVC	Chlorine	Longer lifetime	1.6714
PVC	Chlorine	Recycling	0.010686
PVC	Chlorine	Energy recovery	0.138918
PVC	Chlorine	Incineration	0
PVC	Chlorine	Landfill	0.90831
PVC	Chlorine	Emission to air	0
PVC	Chlorine	Emission to land	0
PVC	Chlorine	Emission to water	0
PVC	Chlorine	Wastewater	0
PVC	Chlorine	Other	0.010686
PC	Chlorine	Exports	0.24373
PC	Chlorine	Longer lifetime	0.0265167
PC	Chlorine	Recycling	0.00897779
PC	Chlorine	Energy recovery	0.00897779
PC	Chlorine	Incineration	0
PC	Chlorine	Landfill	0.0817976
PC	Chlorine	Emission to air	0
PC	Chlorine	Emission to land	0
PC	Chlorine	Emission to water	0
PC	Chlorine	Wastewater	0
PC	Chlorine	Other	0
Water treatment	Chlorine	Exports	0
Water treatment	Chlorine	Longer lifetime	0
Water treatment	Chlorine	Recycling	0
Water treatment	Chlorine	Energy recovery	0
Water treatment	Chlorine	Incineration	0
Water treatment	Chlorine	Landfill	0
Water treatment	Chlorine	Emission to air	0
Water treatment	Chlorine	Emission to land	0
Water treatment	Chlorine	Emission to water	0
Water treatment	Chlorine	Wastewater	1.32
Water treatment	Chlorine	Other	0
Cleaning agents	Chlorine	Exports	0
Cleaning agents	Chlorine	Longer lifetime	0
Cleaning agents	Chlorine	Recycling	0
Cleaning agents	Chlorine	Energy recovery	0
Cleaning agents	Chlorine	Incineration	0
Cleaning agents	Chlorine	Landfill	0
Cleaning agents	Chlorine	Emission to air	0
Cleaning agents	Chlorine	Emission to land	0
Cleaning agents	Chlorine	Emission to water	0.0102
Cleaning agents	Chlorine	Wastewater	0.4998
Cleaning agents	Chlorine	Other	0
Paints	Chlorine	Exports	0
Paints	Chlorine	Longer lifetime	0.513
Paints	Chlorine	Recycling	0.01539
Paints	Chlorine	Energy recovery	0
Paints	Chlorine	Incineration	0
Paints	Chlorine	Landfill	0.04161
Paints	Chlorine	Emission to air	0
Paints	Chlorine	Emission to land	0
Paints	Chlorine	Emission to water	0
Paints	Chlorine	Wastewater	0
Paints	Chlorine	Other	0
Personal care	Chlorine	Exports	0
Personal care	Chlorine	Longer lifetime	0
Personal care	Chlorine	Recycling	0
Personal care	Chlorine	Energy recovery	0
Personal care	Chlorine	Incineration	0
Personal care	Chlorine	Landfill	0.0036
Personal care	Chlorine	Emission to air	0
Personal care	Chlorine	Emission to land	0
Personal care	Chlorine	Emission to water	0.0012
Personal care	Chlorine	Wastewater	0.0552
Personal care	Chlorine	Other	0
Pulp and paper treatment	Chlorine	Exports	0
Pulp and paper treatment	Chlorine	Longer lifetime	0
Pulp and paper treatment	Chlorine	Recycling	0
Pulp and paper treatment	Chlorine	Energy recovery	0
Pulp and paper treatment	Chlorine	Incineration	0
Pulp and paper treatment	Chlorine	Landfill	0
Pulp and paper treatment	Chlorine	Emission to air	0
Pulp and paper treatment	Chlorine	Emission to land	0
Pulp and paper treatment	Chlorine	Emission to water	0
Pulp and paper treatment	Chlorine	Wastewater	0.13
Pulp and paper treatment	Chlorine	Other	0
Paper and plastic additives	Chlorine	Exports	0
Paper and plastic additives	Chlorine	Longer lifetime	0
Paper and plastic additives	Chlorine	Recycling	0.0672
Paper and plastic additives	Chlorine	Energy recovery	0.0308
Paper and plastic additives	Chlorine	Incineration	0
Paper and plastic additives	Chlorine	Landfill	0.182
Paper and plastic additives	Chlorine	Emission to air	0
Paper and plastic additives	Chlorine	Emission to land	0
Paper and plastic additives	Chlorine	Emission to water	0
Paper and plastic additives	Chlorine	Wastewater	0
Paper and plastic additives	Chlorine	Other	0
Losses	Chlorine	Exports	0
Losses	Chlorine	Longer lifetime	0
Losses	Chlorine	Recycling	0.719988
Losses	Chlorine	Energy recovery	0.296832
Losses	Chlorine	Incineration	0.015048
Losses	Chlorine	Landfill	0.0126
Losses	Chlorine	Emission to air	0.0252
Losses	Chlorine	Emission to land	0
Losses	Chlorine	Emission to water	0
Losses	Chlorine	Wastewater	0
Losses	Chlorine	Other	0.828016
Fertilizers	Ammonia	Emission to air	0.68
Fertilizers	Ammonia	Emission to land	3.86
Fertilizers	Sulfuric acid	Emission to land	2.05

## Sheet: Ethylene
From	Subcategory	To	Subcategory	Quantity (Mt)	Details / notes
Production	N/A	Ethylene	N/A	32.76
Ethylene	N/A	Export	N/A	0.14
Ethylene	N/A	HDPE	N/A	8.48
Ethylene Tier 2	Ethylene vinyl acetate	HDPE	N/A	0.06
Ethylene	N/A	LDPE/LLDPE	N/A	10.67
Ethylene Tier 2	Ethylene vinyl acetate	LDPE/LLDPE	N/A	0.23
Ethylene Tier 2	Ethylene vinyl alcohol	LDPE/LLDPE	N/A	0.04
Ethylene	N/A	Ethylene Tier 1	Ethylene oxide	3.59
Other	N/A	Ethylene Tier 1	Ethylene oxide	4.5	O2
Ethylene	N/A	Ethylene Tier 1	Ethylene dichloride	3.91
Chlorine	N/A	Ethylene Tier 1	Ethylene dichloride	3.97
By-product HCl	N/A	Ethylene Tier 1	Ethylene dichloride	5.92
Ethylene	N/A	Ethylene Tier 1	Ethylbenzene	1.08
Benzene	N/A	Ethylene Tier 1	Ethylbenzene	3
Ethylene	N/A	Ethylene Tier 1	Vinyl acetate	0.46
Methanol Tier 1	Acetic acid	Ethylene Tier 1	Vinyl acetate	0.98
Other	N/A	Ethylene Tier 1	Vinyl acetate	0.26	O2
Ethylene	N/A	Ethylene Tier 1	Acetaldehyde	0.05
Other	N/A	Ethylene Tier 1	Acetaldehyde	0.04	H2O
Ethylene Tier 1	Ethylene oxide	Side product	N/A	3.8	CO2, H2O
Ethylene Tier 1	Vinyl acetate	Side product	N/A	0.29	H2O
Ethylene	N/A	Ethylene Tier 2	Ethylene vinyl acetate	0.32
Ethylene	N/A	Ethylene Tier 2	Ethylene vinyl alcohol	0.09
Ethylene	N/A	Other	N/A	3.78
Ethylene	N/A	Losses	N/A	0.19
Chlorine	N/A	Losses	N/A	1.26
Methanol Tier 1	Acetic Acid	Losses	N/A	0.07
Ethylene Tier 1	Ethylene oxide	Export	N/A	0.23
Ethylene Tier 1	Ethylene oxide	Ethylene Tier 2	Ethylene glycol	2.39
Other	N/A	Ethylene Tier 2	Ethylene glycol	0.98	H2O
Ethylene Tier 1	Ethylene oxide	Ethylene Tier 2	Ethoxylates	0.77
Other	N/A	Ethylene Tier 2	Ethoxylates	0.52	CO, H2
Imports	N/A	Ethylene Tier 2	Ethoxylates	0.11
Ethylene Tier 1	Ethylene oxide	Ethylene Tier 2	Ethanolamines	0.39
Ammonia	N/A	Ethylene Tier 2	Ethanolamines	0.15
Ethylene Tier 1	Ethylene oxide	Ethylene Tier 2	E-series glycol ethers	0.13
Propylene Tier 1	Butanol	Ethylene Tier 2	E-series glycol ethers	0.19
Ethylene Tier 1	Ethylene oxide	Ethylene Tier 2	Polyethylene glycol	0.11
Ethylene Tier 2	Ethylene glycol	Ethylene Tier 2	Polyethylene glycol	0.15
Ethylene Tier 1	Ethylene oxide	Ethylene Tier 2	Polyether polyols	0.12
Propylene Tier 1	Propylene oxide	Ethylene Tier 2	Polyether polyols	1.08
Propylene Tier 3	Tetrahydrofuran	Ethylene Tier 2	Polyether polyols	0.06
Ethylene Tier 1	Ethylene oxide	Other	N/A	0.06
Ethylene Tier 1	Ethylene dichloride	Ethylene Tier 2	Vinyl chloride	13.08
Ethylene Tier 1	Ethylene dichloride	Ethylene Tier 2	Trichloroethylene	0.06
Chlorine	N/A	Ethylene Tier 2	Trichloroethylene	0.09
Ethylene Tier 1	Ethylene dichloride	Other	N/A	0.08
Ethylene Tier 1	Ethylbenzene	Ethylene Tier 2	Styrene	4.08
Ethylene Tier 1	Vinyl acetate	Ethylene Tier 2	Polyvinyl acetate	0.66
Ethylene Tier 1	Vinyl acetate	Ethylene Tier 2	Polyvinyl alcohol	0.1
Methanol	N/A	Ethylene Tier 2	Polyvinyl alcohol	0.08
Ethylene Tier 1	Vinyl acetate	Ethylene Tier 2	Ethylene vinyl acetate	0.06
Ethylene Tier 1	Vinyl acetate	Ethylene Tier 2	Ethylene vinyl alcohol	0.06
Ethylene Tier 1	Acetaldehyde	Personal care	N/A	0.01
Ethylene Tier 1	Acetaldehyde	Propylene Tier 2	n-butyl acetate	0.02
Ethylene Tier 1	Acetaldehyde	MethanolTier 2	Pentaerythritol	0.01
Ethylene Tier 1	Acetaldehyde	Animal feeds	N/A	0.03
Ethylene Tier 1	Acetaldehyde	Other	N/A	0.02
Ethylene Tier 1	Ethylene oxide	Losses	Ethanolamines	0.06
Ammonia	N/A	Losses	Ethanolamines	0.03
Ethylene Tier 1	Ethylene oxide	Losses	E-series glycol ethers	0.03
Propylene Tier 1	Butanol	Losses	E-series glycol ethers	0.04
Ethylene Tier 1	Ethylene dichloride	Losses	Vinyl chloride	0.54
Ethylene Tier 1	Ethylene dichloride	Export	N/A	0.04
Ethylene Tier 1	Vinyl acetate	Export	N/A	0.53
Ethylene Tier 2	Ethylene glycol	Antifreeze	N/A	0.84
Ethylene Tier 2	Ethylene glycol	PET	N/A	1.14
Ethylene Tier 2	Polyvinyl acetate	PET	N/A	0.02
Ethylene Tier 2	Styrene	PET	N/A	0.22
Ethylene Tier 2	Ethylene vinyl alcohol	PET	N/A	0.01
Ethylene Tier 2	Ethylene vinyl acetate	PET	N/A	0.01
Ethylene Tier 3	Styrene-butadiene latex	PET	N/A	0.14
Propylene Tier 2	Acrylate esters	PET	N/A	0.04
Propylene Tier 2	Propylene glycol	PET	N/A	0.11
Xylenes Tier 2	Terephthalic acid	PET	N/A	2.74
Xylenes Tier 2	Dimethyl terephthalate	PET	N/A	0.36
Xylenes Tier 2	Isophthalic acid	PET	N/A	0.06
Imports	N/A	PET	N/A	0.52
Ethylene Tier 2	Ethylene glycol	PUR	N/A	0.12
Ethylene Tier 2	Polyether polyols	PUR	N/A	0.72
Propylene Tier 2	Butanediol	PUR	N/A	0.03
Benzene Tier 3	Methylene diphenyl diisocyanate	PUR	N/A	1.29
Toluene Tier 1	Toluene diisocyanate	PUR	N/A	0.28
Methanol Tier 4	Carbon tetrachloride	PUR	N/A	0.05
Ethylene Tier 2	Ethylene glycol	Export	N/A	0.56
Ethylene Tier 2	Ethylene glycol	Other industrial use	N/A	0.05
Ethylene Tier 2	Ethylene glycol	Other polymers	N/A	0.09
Ethylene Tier 2	Ethylene glycol	Other	N/A	0.15
Ethylene Tier 2	Ethoxylates	Side product	N/A	0.82	Unknown
Ethylene Tier 2	Ethoxylates	Cleaning agents	N/A	0.58
Ethylene tier 2	Ethanolamine	Cleaning agents	N/A	0.07
Ethylene Tier 2	Polyethylene glycol	Cleaning agents	N/A	0.02
Ethylene Tier 2	E-series glycol ethers	Cleaning agents	N/A	0.03
Ethylene Tier 3	Ethyleneamines	Cleaning agents	N/A	0.02
Ethylene Tier 2	Ethanolamines	Other industrial use	N/A	0.22
Ethylene Tier 3	Polycarboxylate ethers	Other industrial use	N/A	0.04
Ethylene Tier 2	Polyethylene glycol	Other industrial use	N/A	0.01
Ethylene Tier 2	Ethanolamines	Metals and minerals	N/A	0.04
Ethylene Tier 2	Ethanolamines	Ethylene Tier 3	Ethyleneamines	0.09
Ethylene Tier 2	Ethanolamines	Wood laminates	N/A	0.02
Ethylene Tier 2	Ethanolamines	Other	N/A	0.02
Ethylene Tier 2	Ethanolamines	Export	N/A	0.08
Ethylene Tier 2	E-series glycol ethers	Functional fluids	N/A	0.03
Ethylene Tier 2	Polyethylene glycol	Functional fluids	N/A	0.02
Ethylene Tier 3	Ethyleneamines	Functional fluids	N/A	0.02
Ethylene Tier 2	E-series glycol ethers	Paints and coatings	N/A	0.08
Ethylene Tier 2	Polyvinyl acetate	Paints and coatings	N/A	0.34
Ethylene Tier 3	Ethyleneamines	Paints and coatings	N/A	0.01
Other	N/A	Paints and coatings	N/A	0.01	Carbon black
Ethylene Tier 2	E-series glycol ethers	Other	N/A	0.04
Ethylene Tier 2	E-series glycol ethers	Export	N/A	0.14
Ethylene Tier 2	Polyethylene glycol	Pharmaceuticals	N/A	0.02
Ethylene Tier 2	Polyethylene glycol	Personal care	N/A	0.01
Ethylene Tier 2	Polyethylene glycol	Ethylene Tier 3	Polycarboxylate ethers	0.04
Ethylene Tier 2	Polyethylene glycol	Other	N/A	0.03
Ethylene Tier 2	Polyethylene glycol	Export	N/A	0.11
Ethylene Tier 2	Polyether polyols	Export	N/A	0.54
Ethylene Tier 2	Vinyl chloride	PVC	N/A	6.96
Xylenes Tier 2	Phthalic anhydride	PVC	N/A	0.12
Ethylene Tier 2	Ethylene vinyl acetate	PVC	N/A	0.01
Ethylene Tier 2	Vinyl chloride	Other	N/A	0.08
Ethylene Tier 2	Vinyl chloride	Side product	N/A	4.82	By-product HCl
Ethylene Tier 2	Vinyl chloride	Export	N/A	0.78
Ethylene Tier 2	Trichloroethylene	Ethylene Tier 3	HFC-125	0.02
Sulfuric acid Tier 1	Hydrofluoric acid	Ethylene Tier 3	HFC-125	0.02
Ethylene Tier 2	Trichloroethylene	Ethylene Tier 3	HFC-134a	0.06
Sulfuric acid Tier 1	Hydrofluoric acid	Ethylene Tier 3	HFC-134a	0.04
Ethylene Tier 2	Trichloroethylene	Side product	N/A	0.07	By-product HCl
Ethylene Tier 2	Styrene	PS	N/A	1.92
Methanol Tier 4	Carbon tetrachloride	PS	N/A	0.02
Ethylene Tier 2	Styrene	Other polymers	N/A	0.23
Ethylene Tier 2	Styrene	Ethylene Tier 3	Styrene-butadiene latex	0.14
Butadiene	N/A	Ethylene Tier 3	Styrene-butadiene latex	0.1
Imports	N/A	Ethylene Tier 3	Styrene-butadiene latex	0.05
Ethylene Tier 2	Styrene	Ethylene Tier 3	Styrene-butadiene rubber	0.19
Butadiene	N/A	Ethylene Tier 3	Styrene-butadiene rubber	0.32
Ethylene Tier 2	Styrene	Side product	N/A	0.08	H2
Ethylene Tier 2	Styrene	Export	N/A	1.29
Ethylene Tier 2	Polyvinyl acetate	Adhesives	N/A	0.24
Ethylene Tier 2	Polyvinyl alcohol	Adhesives	N/A	0.04
Ethylene Tier 2	Polyvinyl acetate	Paper and plastic additives	N/A	0.03
Ethylene Tier 2	Polyvinyl alcohol	Paper and plastic additives	N/A	0.03
Other	Carbon black	Paper and plastic additives	N/A	0.16
Ethylene Tier 3	Styrene-butadiene latex	Paper and plastic additives	N/A	0.15
Ethylene Tier 2	Polyvinyl acetate	Pulp and paper treatment	N/A	0.03
Ethylene Tier 2	Polyvinyl alcohol	Other polymers	N/A	0.08
Ethylene Tier 2	Ethylene vinyl acetate	Other polymers	N/A	0.07
Ethylene Tier 2	Ethylene vinyl alcohol	Other polymers	N/A	0.03
Ethylene Tier 3	HFC-125	Other polymers	N/A	0.04
Ethylene Tier 3	HFC-134a	Other polymers	N/A	0.04
Ethylene Tier 2	Ethylene vinyl alcohol	Exports	N/A	0.07
Ethylene Tier 2	Polyvinyl alcohol	Other	N/A	0.01
Ethylene Tier 2	Polyvinyl alcohol	Side product	N/A	0.02	H2O
Ethylene Tier 3	Styrene-butadiene rubbers	Rubbers	N/A	0.49
Other	Carbon black	Rubbers	N/A	1.16
Ethylene Tier 3	Styrene-butadiene rubbers	Export	N/A	0.02
Ethylene Tier 3	Ethyleneamines	Nylon 6	N/A	0.03
Ethylene Tier 3	Ethyleneamines	Other	N/A	0.01
Ethylene Tier 2	Ethylene glycol	Losses	N/A	0.27	From PET production
Ethylene Tier 2	Vinyl chloride	Losses	N/A	0.44	From PVC production
Ethylene Tier 2	Styrene	Losses	N/A	0.01	From other polymers production
Ethylene Tier 3	HFC-125	Side product	N/A	0.02	HCl
Ethylene Tier 3	HFC-134a	Side product	N/A	0.05	HCl
Import	N/A	Ethylene Tier 3	HFC-125	0.02
Ethylene Tier 3	HFC-134a	Export	N/A	0.01
PET	N/A	Side product	N/A	0.66	H2O
PUR	N/A	Side product	N/A	0.12	N2
PUR	N/A	Export	N/A	0.64
PVC	N/A	Export	N/A	2.01

## Sheet: Propylene
From	Subcategory	To	Subcategory	Quantity (Mt)	Details / notes
Production	N/A	Propylene	N/A	12.68
Imports	N/A	Propylene	N/A	2.65
Propylene	N/A	PP	N/A	7.43
Propylene	N/A	Losses	N/A	0.23	from PP production
PP	N/A	Export	N/A	1.63
Propylene	N/A	Propylene Tier 1	Propylene oxide	1.39
Sodium hydroxide	N/A	Propylene Tier 1	Propylene oxide	1.2
Chlorine	N/A	Propylene Tier 1	Propylene oxide	1.17
Other	N/A	Propylene Tier 1	Propylene oxide	0.46	OH (supplied as HOCl)
Propylene	N/A	Losses	N/A	0.14	from propylene oxide production
Propylene Tier 1	Propylene Oxide	Side product	N/A	2.29	NaCl, H2O
Propylene Tier 1	Propylene Oxide	Export	N/A	0.13
Propylene	N/A	Propylene Tier 1	Acrylonitrile	1.04
Ammonia	N/A	Propylene Tier 1	Acrylonitrile	0.42
Other	N/A	Propylene Tier 1	Acrylonitrile	1.17	O2
Propylene	N/A	Losses	N/A	0.34	from acrylonitrile production
Ammonia	N/A	Losses	N/A	0.23	from acrylonitrile production
Propylene Tier 1	Acrylonitrile	Side product	N/A	1.33	H2O
Propylene Tier 1	Acrylonitrile	Export	N/A	0.22
Propylene	N/A	Propylene Tier 1	Cumene	0.92
Benzene	N/A	Propylene Tier 1	Cumene	1.71
Imports	N/A	Propylene Tier 1	Cumene	0.13
Propylene	N/A	Propylene Tier 1	Acrylic acid	0.69
Other	N/A	Propylene Tier 1	Acrylic acid	0.77	O2
Propylene	N/A	Losses	N/A	0.08	from Acrylic acid production
Propylene Tier 1	Acrylic acid	Side product	N/A	0.29	H2O
Propylene Tier 1	Acrylic acid	Export	N/A	0.2
Propylene	N/A	Propylene Tier 1	2-Ethylhexanol	0.25
Other	N/A	Propylene Tier 1	2-Ethylhexanol	0.29	CO, H2
Propylene	N/A	Losses	N/A	0.06	from 2-ethylhexanol production
Propylene Tier 1	2-Ethylhexanol	Side product	N/A	0.15	CO2
Propylene Tier 1	2-Ethylhexanol	Export	N/A	0.02
Propylene	N/A	Propylene Tier 1	Isopropanol	0.31
Other	N/A	Propylene Tier 1	Isopropanol	0.14	H2O
Propylene Tier 2	Acetone	Propylene Tier 1	Isopropanol	0.04
Propylene	N/A	Propylene Tier 1	Butanol	0.51
Other	N/A	Propylene Tier1	Butanol	0.39	CO, H2
Propylene Tier 1	Butanol	Export	N/A	0.04
Propylene	N/A	Propylene Tier 1	Epichlorohydrin	0.1
Chlorine	N/A	Propylene Tier 1	Epichlorohydrin	0.35
Sodium hydroxide	N/A	Propylene Tier 1	Epichlorohydrin	0.13
Propylene Tier 1	Epichlorohydrin	Side product	N/A	0.14
Propylene Tier 1	Epichlorohydrin	Side product	N/A	0.18	NaCl
Propylene Tier 1	Epichlorohydrin	Export	N/A	0.03	By-product HCl
Propylene	N/A	Other	N/A	1.84
Propylene Tier 1	Propylene oxide	Propylene Tier 2	Propylene Glycol	0.48
Other	N/A	Propylene Tier 2	Propylene Glycol	0.15	H2O
Propylene Tier 2	Propylene glycol	Export	N/A	0.12
Propylene Tier 1	Propylene oxide	Propylene Tier 2	Butanediol	0.04
Methanol Tier 1	Formaldehyde	Propylene Tier 2	Butanediol	0.18
Other	Acetlyene	Propylene Tier 2	Butanediol	0.06
Propylene Tier 1	Propylene oxide	Losses	N/A	0.01	from butanediol production
Propylene Tier 2	Butanediol	Export	N/A	0.01
Propylene Tier 1	Propylene oxide	Propylene Tier 2	P-series glycol ethers	0.11
Methanol	N/A	Propylene Tier 2	P-series glycol ethers	0.06
Propylene Tier 1	Propylene oxide	Losses	N/A	0.02	from P-series glycol ethers
Propylene Tier 2	P-series glycol ethers	Export	N/A	0.03
Propylene Tier 1	Propylene oxide	Other	N/A	0.06
Propylene Tier 1	Propylene oxide	Ethylene Tier 2	Polyether polyols	1.08
Propylene Tier 1	Acrylonitrile	Propylene Tier 2	Acrylamide	0.16
Other	N/A	Propylene Tier 2	Acrylamide	0.06	H2O
Propylene Tier 2	Acrylamide	Export	N/A	0.02
Propylene Tier 1	Acrylonitrile	Losses	N/A	0.13	from acrylamide production
Propylene Tier 1	Acrylonitrile	Propylene Tier 2	Adiponitrile	0.49
Butadiene	N/A	Propylene Tier 2	Adiponitrile	0.29
Ammonia Tier 1	Hydrogen cyanide	Propylene Tier 2	Adiponitrile	0.38
Butadiene	N/A	Losses	N/A	0.04	from adiponitrile production
Propylene Tier 2	Adiponitrile	Export	N/A	0.5
Propylene Tier 1	Acrylonitrile	Propylene Tier 2	Nitrile rubber	0.01
Butadiene	N/A	Propylene Tier 2	Nitrile rubber	0.01
Butadiene	N/A	Losses	N/A	0.01	from nitrile rubber production
Import	N/A	Propylene Tier 2	Nitrile rubber	0.03
Propylene Tier 1	Acrylonitrile	Other industrial uses	Carbon fiber	0.06
Other industrial uses	Carbon fiber	Side product	N/A	0.03	CO2, NH3
Propylene Tier 1	Acrylonitrile	Other polymers	ABS	0.12
Propylene Tier 1	Acrylonitrile	Other	N/A	0.11
Propylene Tier 1	Cumene	Propylene Tier 2	Phenol	1.79
Other	N/A	Propylene Tier 2	Phenol	0.37	O2
Propylene Tier 1	Cumene	Propylene Tier 2	Acetone	0.97
Other	N/A	Propylene Tier 2	Acetone	0.37	O2
Propylene Tier 2	Phenol	Export	N/A	0.07
Import	N/A	Propylene Tier 2	Acetone	0.08
Propylene Tier 1	Acrylic acid	Propylene Tier 2	Acrylate esters	0.45
Propylene Tier 1	Butanol	Propylene Tier 2	Acrylate esters	0.4
Propylene Tier 1	2-Ethylhexanol	Propylene Tier 2	Acrylate esters	0.12
Propylene Tier 1	Isopropanol	Propylene Tier 2	Acrylate esters	0.02
Propylene Tier 2	Acrylate esters	Side product	N/A	0.11	H2O
Propylene Tier 2	Acrylate esters	Export	N/A	0.24
Propylene Tier 1	Acrylic acid	Other polymers	Superabsorbents	0.36
Propylene Tier 1	Acrylic acid	Other	N/A	0.08
Propylene Tier 1	Acrylic acid	Cleaning agents	N/A	0.03
Propylene Tier 1	Acrylic acid	Paper and plastic additives	N/A	0.01
Propylene Tier 1	Acrylic acid	Water treatment	N/A	0.04
Propylene Tier 1	2-Ethylhexanol	Direct solvent	N/A	0.03
Propylene Tier 1	2-Ethylhexanol	Functional fluids	N/A	0.02
Propylene Tier 1	2-Ethylhexanol	Cleaning agents	N/A	0.02
Propylene Tier 1	2-ethylhexanol	Paper and plastic additives	N/A	0.18
Propylene Tier 1	Isopropanol	Propylene Tier 2	MIBK/MIBC	0.02
Propylene Tier 1	Isopropanol	Losses	N/A	0.01	MIBK/MIBC
Propylene Tier 1	Isopropanol	Direct solvent	N/A	0.23
Propylene Tier 1	Isopropanol	Pharmaceuticals	N/A	0.17
Propylene Tier 2	Acetone	Propylene Tier 2	MIBK/MIBC	0.06
Propylene Tier 2	Acetone	Losses	N/A	0.02	MIBK/MIBC
Propylene Tier 3	MIBK/MIBC	Export	N/A	0.01
Propylene Tier 1	Butanol	Ethylene Tier 2	E-series glycol ethers	0.19
Propylene Tier 1	Butanol	Losses	E-series glycol ethers	0.04
Propylene Tier 1	Butanol	Paper and plastic additives	N/A	0.01
Propylene Tier 1	Butanol	Direct solvent	N/A	0.01
Propylene Tier 1	Butanol	Propylene Tier 2	n-butyl acetate	0.12
Propylene Tier 1	Butanol	Losses	N/A	0.01	from n-butyl acetate
Methanol Tier 1	Acetic acid	Propylene Tier 2	n-butyl acetate	0.11
Ethylene Tier 1	Acetaldehyde	Propylene Tier 2	n-butyl acetate	0.02
Propylene Tier 2	n-butyl acetate	Side product	N/A	0.03	H2O
Propylene Tier 2	n-butyl acetate	Export	N/A	0.06
Propylene Tier 1	Butanol	Other	N/A	0.08
Propylene Tier 1	Epichlorohydrin	Paints and coatings	N/A	0.09
Propylene Tier 1	Epichlorohydrin	Adhesives	N/A	0.09
Propylene Tier 1	Epichlorohydrin	Other	N/A	0.05
Propylene Tier 2	Acetone	Direct solvent	N/A	0.5
Propylene Tier 3	Polyacrlamide	Metals and minerals	N/A	0.01
Propylene Tier 2	Propylene glycol	Pharmaceuticals	N/A	0.23
Propylene Tier 2	Propylene glycol	PET	N/A	0.11
Propylene Tier 2	Propylene glycol	Other	N/A	0.17
Propylene Tier 2	Butanediol	Propylene Tier 3	Tetrahydrofuran	0.08
Propylene Tier 3	Tetrahydrofuran	Side product	N/A	0.02	H2O
Imports	N/A	Propylene Tier 3	Tetrahydrofuran	0.02
Propylene Tier 2	Butanediol	Propylene Tier 3	gamma-butyrolactone	0.12
Propylene Tier 3	gamma-butyrolactone	Side product	N/A	0.01	H2
Propylene Tier 2	Butanediol	Other polymers	polybutylene terephthalate	0.02
Propylene Tier 2	Butanediol	Other	N/A	0.02
Propylene Tier 2	Butanediol	PUR	N/A	0.03
Propylene Tier 2	P-series glycol ethers	Cleaning agents	N/A	0.01
Propylene Tier 2	P-series glycol ethers	Paints and coatings	N/A	0.07
Propylene Tier 2	P-series glycol ethers	Other	N/A	0.06
Propylene Tier 2	Acrylamide	Propylene Tier 3	Polyacrylamide	0.19
Propylene Tier 2	Acrylamide	Other	N/A	0.01
Propylene Tier 2	Adiponitrile	Propylene Tier 3	Hexamethylenediamine	0.64
Other	N/A	Propylene Tier 3	Hexamethylenediamine	0.05	H2
Propylene Tier 2	Adiponitrile	Losses	N/A	0.02	from HMDA production
Propylene Tier 3	Hexamethylenediamine	Export	N/A	0.1
Propylene Tier 2	Nitrile rubber	Rubbers	N/A	0.05
Propylene Tier 2	Phenol	Propylene Tier 3	Bisphenol A	0.84
Propylene Tier 2	Acetone	Propylene Tier 3	Bisphenol A	0.24
Propylene Tier 3	Bisphenol A	Side product	N/A	0.08	H2O
Propylene Tier 3	Bisphenol A	Export	N/A	0.16
Propylene Tier 2	Phenol	Wood laminates	N/A	0.67
Propylene Tier 2	Phenol	Benzene Tier 1	KA oil	0.4
Propylene Tier 2	Phenol	Losses	N/A	0.04	From KA oil prodution
Propylene Tier 2	Phenol	Other	N/A	0.14
Propylene Tier 2	Acetone	Propylene Tier 3	Methyl methacrylate	0.47
Methanol	N/A	Propylene Tier 3	Methyl methacrylate	0.28
Ammonia Tier 1	Hydrogen cyanide	Propylene Tier 3	Methyl methacrylate	0.21
Sulfuric acid	N/A	Propylene Tier 3	Methyl methacrylate	1.1
Propylene Tier 3	Methyl methacrylate	Side product	Ammonium sulfate	1.36
Propylene Tier 2	Acetone	Other	N/A	0.09
Propylene Tier 2	Acrylate esters	Paints and coatings	N/A	0.3
Propylene Tier 2	Acrylate esters	Paper and plastic additives	N/A	0.07
Propylene Tier 2	Acrylate esters	PET	N/A	0.04
Propylene Tier 2	Acrylate esters	Adhesives and sealants	N/A	0.19
Propylene Tier 2	Acrylate esters	Other	N/A	0.04
Propylene Tier 2	MIBK/MIBC	Rubbers	N/A	0.01
Propylene Tier 2	MIBK/MIBC	Functional fluids	N/A	0.02
Propylene Tier 2	MIBK/MIBC	Paints and coatings	N/A	0.02
Propylene Tier 2	MIBK/MIBC	Other	N/A	0.02
Propylene Tier 2	n-butyl acetate	Paints and coatings	N/A	0.16
Propylene Tier 3	Tetrahydrofuran	Ethylene Tier 2	Polyether polyols	0.06
Propylene Tier 3	Tetrahydrofuran	Direct solvent	N/A	0.02
Propylene Tier 3	Gamma-butyrolactone	Propylene Tier 4	N-methyl-2-pyrrolidone	0.09
Methanol Tier 1	Methylamine	Propylene Tier 4	N-methyl-2-pyrrolidone	0.02
Propylene Tier 4	N-methyl-2-pyrrolidone	Side product	N/A	0.02	H2O
Propylene Tier 3	Gamma-butyrolactone	Other	N/A	0.02
Propylene Tier 3	Polyacrylamide	Export	N/A	0.03
Propylene Tier 3	Polyacrylamide	Paper and plastic additives	N/A	0.02
Propylene Tier 3	Polyacrylamide	Gasoline	N/A	0.02
Propylene Tier 3	Polyacrylamide	water treatment	N/A	0.08
Propylene Tier 3	Polyacrylamide	Metals and minerals	N/A	0.01
Propylene Tier 3	Polyacrylamide	Other	N/A	0.03
Propylene Tier 3	Methyl methacrylate	Paints and coatings	N/A	0.19
Propylene Tier 3	Methyl methacrylate	Other polymers	PMMA	0.38
Propylene Tier 3	Methyl methacrylate	Other	N/A	0.13
Other polymers	PMMA	Export	N/A	0.05
Propylene Tier 3	Hexamethylenediamine	Nylons	N/A	0.38
Benzene Tier 2	Caprolactam	Nylons	N/A	0.45
ethylene Tier 3	Ethyleneamines	Nylons	N/A	0.03
Benzene Tier 2	Adipic acid	Nylons	N/A	0.48
Propylene Tier 3	Hexamethylenediamine	Losses	N/A	0.18	from nylon production
Benzene Tier 2	Adipic acid	Losses	N/A	0.05	from nylon production
Nylons	N/A	Side product	N/A	0.06	H2O
Nylons	N/A	Export	N/A	0.46
Propylene Tier 3	Hexamethylenediamine	Other	N/A	0.03
Propylene Tier 3	Bisphenol A	Adhesives and sealants	N/A	0.17
Propylene Tier 3	Bisphenol A	Polycarbonate	N/A	0.66
Propylene Tier 3	Bisphenol A	Losses	N/A	0.01	from PC production
Chlorine Tier 1	Phosgene	Polycarbonate	N/A	0.37
Sodium hydroxide	N/A	Polycarbonate	N/A	0.23
Polycarbonate	N/A	Side product	N/A	0.44	NaCl, H2O
Polycarbonate	N/A	Export	N/A	0.39
Propylene Tier 4	N-methyl-2-pyrrolidone	Paints and coatings	N/A	0.01
Propylene Tier 4	N-methyl-2-pyrrolidone	Direct solvent	N/A	0.1

## Sheet: Butylenes
From	Subcategory	To	Subcategory	Quantity (Mt)	Details / notes
Production	N/A	Butylenes	N/A	5.94
Imports	N/A	Butylenes	N/A	2.54
Butylenes	N/A	Gasoline	N/A	6.02
Butylenes	N/A	Butylenes Tier 1	Methyl tert-butyl ether	1.19
Methanol	N/A	Butylenes Tier 1	Methyl tert-butyl ether	0.5
Butylenes	N/A	Butylenes Tier 1	Ethyl tert-butyl ether	0.68
Ethanol	N/A	Butylenes Tier 1	Ethyl tert-butyl ether	0.55
Butylenes	N/A	Other	N/A	0.59
Butylenes Tier 1	Methyl tert-butyl ether	Export	N/A	0.55
Butylenes Tier 1	Ethyl tert-butyl ether	Export	N/A	1.23
Butylenes Tier 1	Methyl tert-butyl ether	Butylenes Tier 2	Butyl rubber	0.46
Butylenes Tier 1	Methyl tert-butyl ether	Losses	N/A	0.47	from butyl rubber
Butylenes Tier 1	Methyl tert-butyl ether	Gasoline	N/A	0.21
Butylenes Tier 2	Butyl rubber and polyisobutylene	Rubbers	N/A	0.18
Butylenes Tier 2	Butyl rubber and polyisobutylene	Export	N/A	0.12
Butylenes Tier 2	Butyl rubber and polyisobutylene	Side product	N/A	0.16	Methanol

## Sheet: Butadiene
From	Subcategory	To	Subcategory	Quantity (Mt)	Details / notes
Production	N/A	Butadiene	N/A	1.32
Imports	N/A	Butadiene	N/A	0.07
Butadiene	N/A	Ethylene Tier 3	Styrene-butadiene latex	0.1
Butadiene	N/A	Ethylene Tier 3	Styrene-butadiene rubber	0.32
Butadiene	N/A	Propylene Tier 2	Adiponitrile	0.29
Butadiene	N/A	Losses	N/A	0.04	from adiponitrile production
Butadiene	N/A	Propylene Tier 2	Nitrile rubber	0.01
Butadiene	N/A	Losses	N/A	0.01	from nitrile rubber production
Butadiene	N/A	Butadiene Tier 1	N/A	0.46
Butadiene	N/A	Other polymers	ABS	0.05
Butadiene	N/A	Other	N/A	0.11
Butadiene Tier 1	Polybutadiene	Rubbers	N/A	0.35
Butadiene Tier 1	Polybutadiene	Export	N/A	0.11

## Sheet: Benzene
From	Subcategory	To	Subcategory	Quantity (Mt)	Details / notes
Production	N/A	Benzene	N/A	5.61
Imports	N/A	Benzene	N/A	0.5
Benzene	N/A	Ethylene Tier 1	Ethylbenzene	3
Benzene	N/A	Propylene Tier 1	Cumene	1.71
Benzene	N/A	Benzene Tier 1	Nitrobenzene	0.79
Ammonia Tier 1	Nitric acid	Benzene Tier 1	Nitrobenzene	0.64
Imports	N/A	Benzene Tier 1	Nitrobenzene	0.13
Benzene	N/A	Benzene Tier 1	KA oil	0.4
Propylene Tier 2	Phenol	Benzene Tier 1	KA oil	0.4
Other	N/A	Benzene Tier 1	KA oil	0.12	H2, O2
Ammonia Tier 1	Nitric acid	Losses	Nitrobenzene	0.04
Benzene	N/A	Losses	KA oil	0.03
Propylene Tier 2	Phenol	Losses	N/A	0.04	From KA oil prodution
Benzene	N/A	Benzene Tier 1	Alkylbenzene	0.18
Other	N/A	Benzene Tier 1	Alkylbenzene	0.2	Paraffin
Benzene Tier 1	Nitrobenzene	Side product	N/A	0.18	H2O
Benzene Tier 1	Nitrobenzene	Benzene Tier 2	Aniline	1.38
Other	N/A	Benzene Tier 2	Aniline	0.02	H2
Imports	N/A	Benzene Tier 2	Aniline	0.02
Benzene Tier 1	KA oil	Benzene Tier 2	Adipic acid	0.43
Benzene Tier 1	KA oil	Benzene Tier 2	Caprolactam	0.35
Benzene Tier 1	KA oil	Other	N/A	0.14
Ammonia Tier 1	Nitric acid	Benzene Tier 2	Adipic acid	0.22
Ammonia Tier 1	Nitric acid	Losses	from adipic acid	0.29
Ammonia	N/A	Benzene Tier 2	Caprolactam	0.36
Sulfuric acid	N/A	Benzene Tier 2	Caprolactam	0.29
Imports	N/A	Benzene Tier 2	Adipic acid	0.03
Imports	N/A	Benzene Tier 2	Caprolactam	0.05
Benzene Tier 1	Alkylbenzene	Cleaning agents	N/A	0.16
Benzene Tier 1	Alkylbenzene	Export	N/A	0.22
Benzene Tier 2	Aniline	Side product	N/A	0.36	O2
Benzene Tier 2	Aniline	Benzene Tier 3	MDI	0.85
Benzene Tier 2	Aniline	Other	N/A	0.15
Benzene Tier 2	Aniline	Losses	N/A	0.06	from MDI
Methanol Tier 1	Formaldehyde	Benzene Tier 3	MDI	0.18
Chlorine Tier 1	Phosgene	Benzene Tier 3	MDI	1.04
Imports	N/A	Benzene Tier 3	MDI	0.07
Benzene Tier 2	Adipic acid	Other	N/A	0.15
Benzene Tier 2	Adipic acid	Nylons	N/A	0.48
Propylene Tier 3	Hexamethylenediamine	Nylons	N/A	0.38
Benzene Tier 2	Caprolactam	Nylons	N/A	0.45
ethylene Tier 3	Ethyleneamines	Nylons	N/A	0.03
Propylene Tier 3	Hexamethylenediamine	Losses	N/A	0.18	from nylon production
Benzene Tier 2	Adipic acid	Losses	N/A	0.05	from nylon production
Benzene Tier 2	Caprolactam	Side product	N/A	0.6	Ammonium sulfate
Benzene Tier 3	MDI	Side product	N/A	0.08	H2O
Benzene Tier 3	MDI	Side product	N/A	0.77	By-product HCl
Ethylene Tier 2	Ethylene glycol	PUR	N/A	0.12
Ethylene Tier 2	Polyether polyols	PUR	N/A	0.72
Propylene Tier 2	Butanediol	PUR	N/A	0.03
Benzene Tier 3	Methylene diphenyl diisocyanate	PUR	N/A	1.29
Toluene Tier 1	Toluene diisocyanate	PUR	N/A	0.28
Methanol Tier 4	Carbon tetrachloride	PUR	N/A	0.05

## Sheet: Toluene
From	Subcategory	To	Subcategory	Quantity (Mt)	Details / notes
Production	N/A	Toluene	N/A	3.03
Imports	N/A	Toluene	N/A	0.43
Toluene	N/A	End product	Gasoline	2.56
Toluene	N/A	End product	Direct solvent	0.56
Toluene	N/A	Toluene Tier 1	Toluene diisocyanate	0.18
Toluene	N/A	Losses	N/A	0.06	TDI production
Ammonia Tier 1	Nitric acid	Toluene Tier 1	Toluene diisocyanate	0.25
Ammonia Tier 1	Nitric acid	Losses	N/A	0.09	TDI production
Chlorine Tier 1	Phosgene	Toluene Tier 1	Toluene diisocyanate	0.39
Other	N/A	Toluene Tier 1	Toluene diisocyanate	0.02	H2
Toluene	N/A	Toluene Tier 1	Benzoic acid	0.04
Toluene	N/A	Losses	N/A	0.06	Benzoic acid production
Other	N/A	Toluene Tier 1	Benzoic acid	0.04	O2
Toluene Tier 1	Toluene diisocyanate	Export	N/A	0.07
Toluene Tier 1	Toluene diisocyanate	Side product	N/A	0.21	H2O
Toluene Tier 1	Toluene diisocyanate	Side product	N/A	0.28	By-product HCl
Toluene Tier 1	Toluene diisocyanate	PUR	N/A	0.28
Toluene Tier 1	Benzoic acid	Export	N/A	0.01
Toluene Tier 1	Benzoic acid	Side product	N/A	0.01	H2O
Toluene Tier 1	Benzoic acid	Toluene Tier 2	Na/K Benzoate	0.02
Toluene Tier 1	Benzoic acid	Paper and plastic additives	N/A	0.04
Toluene Tier 2	Na/K Benzoate	Food	N/A	0.02

## Sheet: Xylenes
From	Subcategory	To	Subcategory	Quantity (Mt)	Details / notes
Production	N/A	Xylenes	N/A	4.19
Imports	N/A	Toluene	N/A	0.29
Xylenes	N/A	Xylenes Tier 1	m-Xylenes	0.1
Xylenes	N/A	Xylenes Tier 1	p-Xylenes	2.11
Xylenes	N/A	Xylenes Tier 1	o-Xylenes	0.26
Xylenes	N/A	Losses	N/A	0.03	m-Xylenes
Xylenes	N/A	Losses	N/A	0.67	p-Xylenes
Xylenes	N/A	Losses	N/A	0.01	o-Xylenes
Xylenes Tier 1	m-Xylenes	Export	N/A	0.03
Xylenes Tier 1	m-Xylenes	Xylenes Tier 2	Isophthalic acid	0.07
Other	N/A	Xylenes Tier 2	Isophthalic acid	0.05	O2
Imports	N/A	Xylenes Tier 2	Isophthalic acid	0.03
Xylenes Tier 1	p-Xylenes	Xylenes Tier 2	Terephthalic acid	1.5
Methanol Tier 1	Acetic acid	Xylenes Tier 2	Terephthalic acid	0.13
Methanol Tier 1	Acetic acid	Losses	N/A	0.13	from TPA
Other	N/A	Xylenes Tier 2	Terephthalic acid	1.35	O2
Imports	N/A	Xylenes Tier 2	Terephthalic acid	0.42
Xylenes Tier 1	p-Xylenes	Xylenes Tier 2	Dimethyl terephthalate	0.22
Methanol	N/A	Xylenes Tier 2	Dimethyl terephthalate	0.13
Other	N/A	Xylenes Tier 2	Dimethyl terephthalate	0.19	O2
Xylenes Tier 1	p-Xylenes	Export	N/A	0.31
Xylenes Tier 1	o-Xylenes	Export	N/A	0.05
Xylenes Tier 1	o-Xylenes	Xylenes Tier 2	Phthalic anhydride	0.17
Other	N/A	Xylenes Tier 2	Phthalic anhydride	0.16	O2
Imports	N/A	Xylenes Tier 2	Phthalic anhydride	0.02
Xylenes Tier 1	o-Xylenes	Other	N/A	0.04
Xylenes Tier 1	p-Xylenes	Losses	N/A	0.08	Terephthalic acid
Xylenes Tier 2	Isophthalic acid	Side product	N/A	0.01	H2O
Xylenes Tier 2	Isophthalic acid	PET	N/A	0.06
Xylene Tier 2	Isophthalic acid	Paints and coatings	N/A	0.01
Xylenes Tier 2	Isophthalic acid	Other polymers	N/A	0.04
Xylenes Tier 2	Isophthalic acid		N/A	0.03
Xylenes Tier 2	Phthalic anhydride	PVC	N/A	0.12
Xylenes Tier 2	Phthalic anhydride	Paints and coatings	N/A	0.03
Xylenes Tier 2	Phthalic anhydride	Other polymers	N/A	0.07
Xylenes Tier 2	Phthalic anhydride	Other	N/A	0.04
Xylenes Tier 2	Phthalic anhydride	Side product	N/A	0.09	H2O
Xylenes Tier 2	Terephthalic acid	Side product	N/A	0.5	H2O
Xylenes Tier 2	Terephthalic acid	PET	N/A	2.74
Xylenes Tier 2	Terephthalic acid	Other polymers	PBT	0.03
Xylenes Tier 2	Dimethyl terephthalate	Export	N/A	0.03
Xylenes Tier 2	Dimethyl terephthalate	PET	N/A	0.36
Xylenes Tier 2	Dimethyl terephthalate	Side product	N/A	0.15	H2O

## Sheet: Methanol
From	Subcategory	To	Subcategory	Quantity (Mt)	Details / notes
Production	N/A	Methanol	N/A	7.98
Imports	N/A	Methanol	N/A	1.71
Methanol	N/A	Methanol Tier 1	Formaldehyde	1.65
Methanol	N/A	Losses	N/A	0.36	Formaldehyde
Imports	N/A	Methanol Tier 1	Formaldehyde	0.22
Methanol	N/A	Methanol Tier 1	Acetic acid	1.07
Methanol	N/A	Losses	N/A	0.12	Acetic acid
Other	N/A	Methanol Tier 1	Acetic acid	0.94
Imports	N/A	Methanol Tier 1	Acetic acid	0.18
Methanol	N/A	Biodiesel	N/A	0.63
Methanol	N/A	Direct solvent	N/A	0.46
Methanol	N/A	Methanol Tier 1	Methylamines	0.23
Methanol	N/A	Losses	N/A	0.08	Methylamines
Ammonia	N/A	Methanol Tier 1	Methylamines	0.12
Ammonia	N/A	Losses	N/A	0.02	Methylamines
Methanol	N/A	Methanol Tier 1	Methyl chloride	0.42
Methanol	N/A	Losses	N/A	0.02	Methyl chloride
Chlorine	N/A	Methanol Tier 1	Methyl chloride	0.15
By-product HCl	N/A	Methanol Tier 1	Methyl chloride	0.32
Methanol	N/A	Ethylene Tier 2	Polyvinyl alcohol	0.08
Methanol	N/A	Propylene Tier 2	P-series glycol ethers	0.06
Methanol	N/A	Propylene Tier 3	Methyl methacrylate	0.28
Methanol	N/A	Butylenes Tier 1	Methyl tert-butyl ether	0.5
Methanol	N/A	Xylenes Tier 2	Dimethyl terephthalate	0.13
Methanol	N/A	Other	N/A	0.18
Methanol Tier 1	Formaldehyde	Side product	N/A	0.02	H2
Methanol Tier 1	Formaldehyde	Other polymers	Polyacetals	0.16
Methanol Tier 1	Formaldehyde	Losses	Polyacetals	0.03
Methanol Tier 1	Formaldehyde	MethanolTier 2	Pentaerythritol	0.02
Methanol Tier 1	Formaldehyde	Losses	Pentaerythritol	0.02
Ethylene Tier 1	Acetaldehyde	MethanolTier 2	Pentaerythritol	0.01
Sodium hydroxide	N/A	MethanolTier 2	Pentaerythritol	0.02
Methanol Tier 1	Formaldehyde	Wood laminates	N/A	0.79
Methanol Tier 1	Formaldehyde	Propylene Tier 2	Butanediol	0.18
Methanol Tier 1	Formaldehyde	Benzene Tier 3	MDI	0.18
Methanol Tier 1	Formaldehyde	Other	N/A	0.47
Methanol Tier 1	Acetic acid	MethanolTier 2	Acetic anhydride	0.66
Imports	N/A	MethanolTier 2	Acetic anhydride	0.11
Methanol Tier 1	Acetic acid	Ethylene Tier 1	Vinyl acetate	0.98
Methanol Tier 1	Acetic Acid	Losses	N/A	0.07
Methanol Tier 1	Acetic acid	Propylene Tier 2	n-butyl acetate	0.11
Methanol Tier 1	Acetic acid	Xylenes Tier 2	Terephthalic acid	0
Methanol Tier 1	Acetic acid	Losses	N/A	0.13	from TPA
Methanol Tier 1	Acetic acid	Other	N/A	0.24
Methanol Tier 1	Methylamines	Side product	N/A	0.13	H2O
Methanol Tier 1	Methylamine	Cleaning agents	N/A	0.05
Methanol Tier 1	Methylamine	Other industrial use	Pesticides	0.02
Methanol Tier 1	Methylamine	Animal feeds	N/A	0.03
Methanol Tier 1	Methylamine	Pulp and paper treatment	N/A	0.02
Methanol Tier 1	Methylamine	Water treatment	N/A	0.04
Methanol Tier 1	Methylamine	Propylene Tier 4	N-methyl-2-pyrrolidone	0.02
Methanol Tier 1	Methylamines	Other	N/A	0.04
Methanol Tier 1	Methyl chloride	Export	N/A	0.07
Methanol Tier 1	Methyl chloride	Side product	N/A	0.23	H2O
Methanol Tier 1	Methyl chloride	MethanolTier 2	Methylene chloride	0.13
Chlorine	N/A	MethanolTier 2	Methylene chloride	0.17
Methanol Tier 1	Methyl chloride	Cleaning agents	N/A	0.02
Methanol Tier 1	Methyl chloride	MethanolTier 2	Methyl chlorosilanes	0.42
Other	Silicon	MethanolTier 2	Methyl chlorosilanes	0.12
Methanol Tier 1	Methyl chloride	MethanolTier 2	Methyl cellulose	0.02
Other	Cellulose	MethanolTier 2	Methyl cellulose	0.02
Other polymers	Polyacetals	Export	N/A	0.06
Methanol Tier 2	Pentaerythritol	Functional fluids	N/A	0.01
Methanol Tier 2	Pentaerythritol	Paints and coatings	N/A	0.02
Methanol Tier 2	Pentaerythritol	Adhesives and sealants	N/A	0.01
Methanol Tier 2	Pentaerythritols	Other	N/A	0.01
MethanolTier 2	Acetic anhydride	Side product	N/A	0.1	H2O
Methanol Tier 2	Acetic anhydride	Other	N/A	0.11
Methanol Tier 2	Acetic anhydride	Pharmaceuticals	N/A	0.02
Methanol Tier 2	Acetic anhydride	Cigarettes	N/A	0.54
Other polymers	Cellulose	Cigarettes	N/A	0.25
Sulfuric acid	N/A	Cigarettes	N/A	0.03
Methanol Tier 2	Methylene chloride	Side product	N/A	0.09	By-product HCl
Methanol Tier 2	Methylene chloride	Methanol Tier 3	Chloroform	0.12
Chlorine	N/A	Methanol Tier 3	Chloroform	0.1
Methanol Tier 2	Methylene chloride	Methanol Tier 3	HFC-32	0.04
Sulfuric acid Tier 1	HF	Methanol Tier 3	HFC-32	0.02
Methanol Tier 2	Methylene chloride	Paints and coatings	N/A	0.01
Methanol Tier 2	Methylene chloride	Pharmaceuticals	N/A	0.02
Methanol Tier 2	Methylene chloride	Other	N/A	0.02
Methanol Tier 2	Methyl chlorosilanes	Methanol Tier 3	Silicones	0.54
Other	N/A	Methanol Tier 3	Silicones	0.08	H2O
Imports	N/A	Methanol Tier 3	Silicones	0.06
Methanol Tier 2	Methyl cellulose	Pharmaceuticals	N/A	0.02
Methanol Tier 2	Methyl cellulose	Adhesives and sealants	N/A	0.01
Methanol Tier 2	Methyl cellulose	Other	N/A	0.01
Cigarettes	N/A	Side product	N/A	0.25	Acetic acid, H2O
Methanol Tier 3	Chloroform	Side product	N/A	0.06	By-product HCl
Methanol Tier 3	Chloroform	Methanol Tier 4	Carbon tetrachloride	0.05
Chlorine	N/A	Methanol Tier 4	Carbon tetrachloride	0.03
Imports	N/A	Methanol Tier 4	Carbon tetrachloride	0.03
Methanol Tier 3	Chloroform	Methanol Tier 4	HCFC-22	0.09
Methanol Tier 3	Chloroform	Losses	HCFC-22	0.02
Sulfuric acid Tier 1	HF	Methanol Tier 4	HCFC-22	0.03
Methanol Tier 3	HFC-32	Side product	N/A	0.03	By-product HCl
Methanol Tier 3	HFC-32	Functional fluids	Air conditioning	0.03
Methanol Tier 3	Silicones	Side product	N/A	0.31	By-product HCl
Methanol Tier 3	Silicones	Pharmaceuticals	N/A	0.01
Methanol Tier 3	Silicones	Personal care	N/A	0.05
Methanol Tier 3	Silicones	Cleaning agents	N/A	0.03
Methanol Tier 3	Silicones	Functional fluids	N/A	0.04
Methanol Tier 3	Silicones	Paints and coatings	N/A	0.02
Methanol Tier 3	Silicones	Paper and plastic additives	N/A	0.01
Methanol Tier 3	Silicones	Adhesives and sealants	N/A	0.01
Methanol Tier 3	Silicones	Methanol Tier 4	Silicone rubbers	0.2
Methanol Tier 4	Carbon tetrachloride	Side product	N/A	0.02	By-product HCl
Methanol Tier 4	Carbon tetrachloride	Functional fluids	Refrigerants	0.02
Methanol Tier 4	Carbon tetrachloride	PUR	N/A	0.05
Methanol Tier 4	Carbon tetrachloride	PS	N/A	0.02
Methanol Tier 4	HCFC-22	Side product	N/A	0.05	By-product HCl
Methanol Tier 4	HCFC-22	Other polymers	Fluoropolymers	0.07
Methanol Tier 4	Silicone rubbers	Rubbers	N/A	0.2

## Sheet: Ethanol
From	Subcategory	To	Subcategory	Quantity (Mt)	Details / notes
Production	N/A	Ethanol	N/A	43.69
Ethanol	N/A	Exports	N/A	4.43
Ethanol	N/A	Paper and plastic additives	N/A	0.04
Ethanol	N/A	Direct solvent	N/A	0.04
Ethanol	N/A	Pharmaceuticals	N/A	0.16
Ethanol	N/A	Butylenes Tier 1	Ethyl tert-butyl ether	0.55
Ethanol	N/A	Food	N/A	0.2
Ethanol	N/A	Gasoline	N/A	37.88
Ethanol	N/A	Personal care and costmetics	N/A	0.09
Ethanol	N/A	Other	N/A	0.3

[truncated: 5 more sheets: Ammonia, Chlorine, Sodium hydroxide, Sulfuric acid, Sodium carbonate]
